# Supplementary material for: Quantifying crowding-ventilation effect on respiratory infections
Source: Research Square preprint supplement (doi:10.21203/rs.3.rs-7664648/v1), 2025-10-09
Supplement: Supplementary file 2 [file Figure 1b.xlsx]

## Sheet: Figure 1b
Figure 1b. CO2 concentration build-up profiles for two crowding levels, at a ventilation rate of 10 L/s per person and 4-hour co-exposure
Time (h)	Continued Hour	Outdoor air change rate (h-1)
		n=20	n=0.5
0	0	400	400
0.01	0.01	545.015	403.99
0.02	0.02	663.744	407.96
0.03	0.03	760.951	411.91
0.04	0.04	840.537	415.841
0.05	0.05	905.696	419.752
0.06	0.06	959.045	423.644
0.07	0.07	1002.72	427.516
0.08	0.08	1038.48	431.368
0.09	0.09	1067.76	435.202
0.1	0.1	1091.73	439.016
0.11	0.11	1111.36	442.812
0.12	0.12	1127.43	446.588
0.13	0.13	1140.58	450.346
0.14	0.14	1151.35	454.085
0.15	0.15	1160.17	457.805
0.16	0.16	1167.39	461.507
0.17	0.17	1173.3	465.19
0.18	0.18	1178.14	468.855
0.19	0.19	1182.1	472.502
0.2	0.2	1185.35	476.13
0.21	0.21	1188	479.74
0.22	0.22	1190.18	483.333
0.23	0.23	1191.96	486.907
0.24	0.24	1193.42	490.464
0.25	0.25	1194.61	494.002
0.26	0.26	1195.59	497.524
0.27	0.27	1196.39	501.027
0.28	0.28	1197.04	504.513
0.29	0.29	1197.58	507.982
0.3	0.3	1198.02	511.434
0.31	0.31	1198.38	514.868
0.32	0.32	1198.67	518.285
0.33	0.33	1198.91	521.685
0.34	0.34	1199.11	525.068
0.35	0.35	1199.27	528.434
0.36	0.36	1199.4	531.784
0.37	0.37	1199.51	535.117
0.38	0.38	1199.6	538.433
0.39	0.39	1199.67	541.732
0.4	0.4	1199.73	545.015
0.41	0.41	1199.78	548.282
0.42	0.42	1199.82	551.533
0.43	0.43	1199.85	554.767
0.44	0.44	1199.88	557.985
0.45	0.45	1199.9	561.187
0.46	0.46	1199.92	564.373
0.47	0.47	1199.93	567.543
0.48	0.48	1199.95	570.698
0.49	0.49	1199.96	573.836
0.5	0.5	1199.96	576.959
0.51	0.51	1199.97	580.067
0.52	0.52	1199.98	583.159
0.53	0.53	1199.98	586.235
0.54	0.54	1199.98	589.296
0.55	0.55	1199.99	592.342
0.56	0.56	1199.99	595.373
0.57	0.57	1199.99	598.389
0.58	0.58	1199.99	601.389
0.59	0.59	1199.99	604.375
0.6	0.6	1200	607.345
0.61	0.61	1200	610.301
0.62	0.62	1200	613.242
0.63	0.63	1200	616.169
0.64	0.64	1200	619.081
0.65	0.65	1200	621.978
0.66	0.66	1200	624.861
0.67	0.67	1200	627.73
0.68	0.68	1200	630.584
0.69	0.69	1200	633.424
0.7	0.7	1200	636.25
0.71	0.71	1200	639.061
0.72	0.72	1200	641.859
0.73	0.73	1200	644.643
0.74	0.74	1200	647.413
0.75	0.75	1200	650.169
0.76	0.76	1200	652.911
0.77	0.77	1200	655.639
0.78	0.78	1200	658.355
0.79	0.79	1200	661.056
0.8	0.8	1200	663.744
0.81	0.81	1200	666.419
0.82	0.82	1200	669.08
0.83	0.83	1200	671.728
0.84	0.84	1200	674.363
0.85	0.85	1200	676.984
0.86	0.86	1200	679.593
0.87	0.87	1200	682.188
0.88	0.88	1200	684.771
0.89	0.89	1200	687.341
0.9	0.9	1200	689.897
0.91	0.91	1200	692.442
0.92	0.92	1200	694.973
0.93	0.93	1200	697.492
0.94	0.94	1200	699.998
0.95	0.95	1200	702.492
0.96	0.96	1200	704.973
0.97	0.97	1200	707.442
0.98	0.98	1200	709.899
0.99	0.99	1200	712.343
1	1	1200	714.775
1.01	1.01	1200	717.196
1.02	1.02	1200	719.604
1.03	1.03	1200	722
1.04	1.04	1200	724.384
1.05	1.05	1200	726.756
1.06	1.06	1200	729.116
1.07	1.07	1200	731.465
1.08	1.08	1200	733.801
1.09	1.09	1200	736.127
1.1	1.1	1200	738.44
1.11	1.11	1200	740.742
1.12	1.12	1200	743.033
1.13	1.13	1200	745.312
1.14	1.14	1200	747.58
1.15	1.15	1200	749.836
1.16	1.16	1200	752.081
1.17	1.17	1200	754.315
1.18	1.18	1200	756.538
1.19	1.19	1200	758.75
1.2	1.2	1200	760.951
1.21	1.21	1200	763.14
1.22	1.22	1200	765.319
1.23	1.23	1200	767.487
1.24	1.24	1200	769.644
1.25	1.25	1200	771.791
1.26	1.26	1200	773.927
1.27	1.27	1200	776.052
1.28	1.28	1200	778.166
1.29	1.29	1200	780.27
1.3	1.3	1200	782.363
1.31	1.31	1200	784.446
1.32	1.32	1200	786.519
1.33	1.33	1200	788.581
1.34	1.34	1200	790.633
1.35	1.35	1200	792.675
1.36	1.36	1200	794.706
1.37	1.37	1200	796.728
1.38	1.38	1200	798.739
1.39	1.39	1200	800.74
1.4	1.4	1200	802.732
1.41	1.41	1200	804.713
1.42	1.42	1200	806.685
1.43	1.43	1200	808.646
1.44	1.44	1200	810.598
1.45	1.45	1200	812.54
1.46	1.46	1200	814.473
1.47	1.47	1200	816.396
1.48	1.48	1200	818.309
1.49	1.49	1200	820.213
1.5	1.5	1200	822.107
1.51	1.51	1200	823.992
1.52	1.52	1200	825.867
1.53	1.53	1200	827.733
1.54	1.54	1200	829.59
1.55	1.55	1200	831.437
1.56	1.56	1200	833.275
1.57	1.57	1200	835.104
1.58	1.58	1200	836.924
1.59	1.59	1200	838.735
1.6	1.6	1200	840.537
1.61	1.61	1200	842.33
1.62	1.62	1200	844.114
1.63	1.63	1200	845.889
1.64	1.64	1200	847.655
1.65	1.65	1200	849.412
1.66	1.66	1200	851.161
1.67	1.67	1200	852.9
1.68	1.68	1200	854.632
1.69	1.69	1200	856.354
1.7	1.7	1200	858.068
1.71	1.71	1200	859.773
1.72	1.72	1200	861.47
1.73	1.73	1200	863.159
1.74	1.74	1200	864.839
1.75	1.75	1200	866.51
1.76	1.76	1200	868.174
1.77	1.77	1200	869.829
1.78	1.78	1200	871.475
1.79	1.79	1200	873.114
1.8	1.8	1200	874.744
1.81	1.81	1200	876.366
1.82	1.82	1200	877.981
1.83	1.83	1200	879.587
1.84	1.84	1200	881.185
1.85	1.85	1200	882.775
1.86	1.86	1200	884.357
1.87	1.87	1200	885.931
1.88	1.88	1200	887.498
1.89	1.89	1200	889.056
1.9	1.9	1200	890.607
1.91	1.91	1200	892.15
1.92	1.92	1200	893.686
1.93	1.93	1200	895.213
1.94	1.94	1200	896.734
1.95	1.95	1200	898.246
1.96	1.96	1200	899.751
1.97	1.97	1200	901.249
1.98	1.98	1200	902.739
1.99	1.99	1200	904.221
2	2	1200	905.696
2.01	2.01	1200	907.164
2.02	2.02	1200	908.625
2.03	2.03	1200	910.078
2.04	2.04	1200	911.524
2.05	2.05	1200	912.963
2.06	2.06	1200	914.394
2.07	2.07	1200	915.819
2.08	2.08	1200	917.236
2.09	2.09	1200	918.647
2.1	2.1	1200	920.05
2.11	2.11	1200	921.446
2.12	2.12	1200	922.835
2.13	2.13	1200	924.218
2.14	2.14	1200	925.593
2.15	2.15	1200	926.962
2.16	2.16	1200	928.324
2.17	2.17	1200	929.679
2.18	2.18	1200	931.027
2.19	2.19	1200	932.368
2.2	2.2	1200	933.703
2.21	2.21	1200	935.031
2.22	2.22	1200	936.353
2.23	2.23	1200	937.668
2.24	2.24	1200	938.976
2.25	2.25	1200	940.278
2.26	2.26	1200	941.573
2.27	2.27	1200	942.862
2.28	2.28	1200	944.145
2.29	2.29	1200	945.421
2.3	2.3	1200	946.691
2.31	2.31	1200	947.954
2.32	2.32	1200	949.211
2.33	2.33	1200	950.462
2.34	2.34	1200	951.706
2.35	2.35	1200	952.945
2.36	2.36	1200	954.177
2.37	2.37	1200	955.403
2.38	2.38	1200	956.623
2.39	2.39	1200	957.837
2.4	2.4	1200	959.045
2.41	2.41	1200	960.246
2.42	2.42	1200	961.442
2.43	2.43	1200	962.632
2.44	2.44	1200	963.816
2.45	2.45	1200	964.994
2.46	2.46	1200	966.166
2.47	2.47	1200	967.332
2.48	2.48	1200	968.493
2.49	2.49	1200	969.647
2.5	2.5	1200	970.796
2.51	2.51	1200	971.939
2.52	2.52	1200	973.077
2.53	2.53	1200	974.209
2.54	2.54	1200	975.335
2.55	2.55	1200	976.455
2.56	2.56	1200	977.57
2.57	2.57	1200	978.68
2.58	2.58	1200	979.783
2.59	2.59	1200	980.882
2.6	2.6	1200	981.975
2.61	2.61	1200	983.062
2.62	2.62	1200	984.144
2.63	2.63	1200	985.221
2.64	2.64	1200	986.292
2.65	2.65	1200	987.358
2.66	2.66	1200	988.418
2.67	2.67	1200	989.473
2.68	2.68	1200	990.523
2.69	2.69	1200	991.568
2.7	2.7	1200	992.608
2.71	2.71	1200	993.642
2.72	2.72	1200	994.671
2.73	2.73	1200	995.695
2.74	2.74	1200	996.714
2.75	2.75	1200	997.728
2.76	2.76	1200	998.737
2.77	2.77	1200	999.741
2.78	2.78	1200	1000.74
2.79	2.79	1200	1001.73
2.8	2.8	1200	1002.72
2.81	2.81	1200	1003.71
2.82	2.82	1200	1004.69
2.83	2.83	1200	1005.66
2.84	2.84	1200	1006.63
2.85	2.85	1200	1007.59
2.86	2.86	1200	1008.55
2.87	2.87	1200	1009.51
2.88	2.88	1200	1010.46
2.89	2.89	1200	1011.4
2.9	2.9	1200	1012.34
2.91	2.91	1200	1013.28
2.92	2.92	1200	1014.21
2.93	2.93	1200	1015.14
2.94	2.94	1200	1016.06
2.95	2.95	1200	1016.98
2.96	2.96	1200	1017.89
2.97	2.97	1200	1018.8
2.98	2.98	1200	1019.7
2.99	2.99	1200	1020.6
3	3	1200	1021.5
3.01	3.01	1200	1022.39
3.02	3.02	1200	1023.27
3.03	3.03	1200	1024.15
3.04	3.04	1200	1025.03
3.05	3.05	1200	1025.9
3.06	3.06	1200	1026.77
3.07	3.07	1200	1027.64
3.08	3.08	1200	1028.5
3.09	3.09	1200	1029.35
3.1	3.1	1200	1030.2
3.11	3.11	1200	1031.05
3.12	3.12	1200	1031.89
3.13	3.13	1200	1032.73
3.14	3.14	1200	1033.56
3.15	3.15	1200	1034.39
3.16	3.16	1200	1035.22
3.17	3.17	1200	1036.04
3.18	3.18	1200	1036.86
3.19	3.19	1200	1037.67
3.2	3.2	1200	1038.48
3.21	3.21	1200	1039.29
3.22	3.22	1200	1040.09
3.23	3.23	1200	1040.89
3.24	3.24	1200	1041.68
3.25	3.25	1200	1042.47
3.26	3.26	1200	1043.26
3.27	3.27	1200	1044.04
3.28	3.28	1200	1044.82
3.29	3.29	1200	1045.59
3.3	3.3	1200	1046.36
3.31	3.31	1200	1047.13
3.32	3.32	1200	1047.89
3.33	3.33	1200	1048.65
3.34	3.34	1200	1049.4
3.35	3.35	1200	1050.15
3.36	3.36	1200	1050.9
3.37	3.37	1200	1051.64
3.38	3.38	1200	1052.38
3.39	3.39	1200	1053.12
3.4	3.4	1200	1053.85
3.41	3.41	1200	1054.58
3.42	3.42	1200	1055.31
3.43	3.43	1200	1056.03
3.44	3.44	1200	1056.75
3.45	3.45	1200	1057.46
3.46	3.46	1200	1058.17
3.47	3.47	1200	1058.88
3.48	3.48	1200	1059.58
3.49	3.49	1200	1060.28
3.5	3.5	1200	1060.98
3.51	3.51	1200	1061.67
3.52	3.52	1200	1062.36
3.53	3.53	1200	1063.05
3.54	3.54	1200	1063.73
3.55	3.55	1200	1064.41
3.56	3.56	1200	1065.09
3.57	3.57	1200	1065.76
3.58	3.58	1200	1066.43
3.59	3.59	1200	1067.1
3.6	3.6	1200	1067.76
3.61	3.61	1200	1068.42
3.62	3.62	1200	1069.08
3.63	3.63	1200	1069.73
3.64	3.64	1200	1070.38
3.65	3.65	1200	1071.03
3.66	3.66	1200	1071.67
3.67	3.67	1200	1072.31
3.68	3.68	1200	1072.95
3.69	3.69	1200	1073.58
3.7	3.7	1200	1074.21
3.71	3.71	1200	1074.84
3.72	3.72	1200	1075.46
3.73	3.73	1200	1076.08
3.74	3.74	1200	1076.7
3.75	3.75	1200	1077.32
3.76	3.76	1200	1077.93
3.77	3.77	1200	1078.54
3.78	3.78	1200	1079.14
3.79	3.79	1200	1079.75
3.8	3.8	1200	1080.35
3.81	3.81	1200	1080.94
3.82	3.82	1200	1081.54
3.83	3.83	1200	1082.13
3.84	3.84	1200	1082.71
3.85	3.85	1200	1083.3
3.86	3.86	1200	1083.88
3.87	3.87	1200	1084.46
3.88	3.88	1200	1085.04
3.89	3.89	1200	1085.61
3.9	3.9	1200	1086.18
3.91	3.91	1200	1086.75
3.92	3.92	1200	1087.31
3.93	3.93	1200	1087.88
3.94	3.94	1200	1088.43
3.95	3.95	1200	1088.99
3.96	3.96	1200	1089.54
3.97	3.97	1200	1090.1
3.98	3.98	1200	1090.64
3.99	3.99	1200	1091.19
