# Supplementary material for: Quantifying crowding-ventilation effect on respiratory infections
Source: Research Square preprint supplement (doi:10.21203/rs.3.rs-7664648/v1), 2025-10-09
Supplement: Supplementary file 4 [file Figure 1c.xlsx]

## Sheet: Effective clean flow rate Fig1c
Table 1. Effective clean flow rate for various crowding levels, at ventilation rates of 0.5, 10 and 100 L/s person, and a co-exposure of 4 hours.
Exposure time (hour)	4
Volume per person (m3)	ACH at a ventilation rate of 0.5, 10 and 100 L/s.p (h-1)			Effective clean flow rate (L/s.p)				clean air equivalent asymptote in Figure 1c
	0.5	10	100	qc = 0.5 L/s.p	qc = 10 L/s.p	qc = 100 L/s.p		qc = 0.5 L/s.p	qc = 10 L/s.p	qc = 100 L/s.p
2	0.9	18	180	0.685108	10.1408	100.139		0.5	10	100
4	0.45	9	90	0.932354	10.2857	100.279		0.5	10	100
8	0.225	4.5	45	1.46786	10.5882	100.559		0.5	10	100
16	0.1125	2.25	22.5	2.56767	11.2498	101.124			10	100
32	0.05625	1.125	11.25	4.78393	12.8165	102.273			10	100
64	0.028125	0.5625	5.625	9.22532	16.6003	104.651			10	100
128	0.0140625	0.28125	2.8125	18.1127	25.0193	109.756				100
256	0.00703125	0.140625	1.40625	35.8897	42.5225	121.527				100
512	0.00351563	0.0703125	0.703125	71.4448	77.931	150.196
1024	0.00175781	0.0351562	0.351562	142.556	148.966	215.911
2048	0.000878906	0.0175781	0.175781	284.778	291.15	354.825
4096	0.000439453	0.00878906	0.0878906	569.222	575.575	637.462
8192	0.000219727	0.00439453	0.0439453	1138.11	1144.45	1205.41
16384	0.000109863	0.00219727	0.0219727	2275.89	2282.23	2342.71
32768	5.49316e-05	0.00109863	0.0109863	4551.44	4557.78	4618.02
65536	2.74658e-05	0.000549316	0.00549316	9102.56	9108.89	9169.01
131072	1.37329e-05	0.000274658	0.00274658	18204.8	18211.1	18271.2
262144	6.86646e-06	0.000137329	0.00137329	36409.2	36415.6	36475.6
524288	3.43323e-06	6.86646e-05	0.000686646	72818.1	72824.4	72884.5
1048576	1.71661e-06	3.43323e-05	0.000343323	145636	145642	145702
