# Supplementary material for: Quantifying crowding-ventilation effect on respiratory infections
Source: Research Square preprint supplement (doi:10.21203/rs.3.rs-7664648/v1), 2025-10-09
Supplement: Supplementary file 6 [file Figure 1d.xlsx]

## Sheet: Effective clean flow rate Fig1d
Table 1. Effective clean flow rate for various crowding levels, at ventilation rates of 0.5 and 10 L/s person, and a co-exposure of 1 and 4 hours.						Table 2. Effective clean flow rate for typical crowding levels of 2, 16, 32 and 64 m3/person, at ventilation rates of 0.5 and 10 L/s person, and a co-exposure of 1 and 4 hours (extracted from Table 1 and provide completed data for Figure 1d).
Exposure time (hr)	4
Volume per person (m3)	ACH at a ventilation rate of 0.5 and 10 L/s.p (h-1)		Effective clean flow rate (L/s.p)			Volume per person (m3)	Effective clean flow rate for combinations of ventilation rate & exposure time
	0.5	10	qc = 0.5 L/s.p	qc = 10 L/s.p			10 L/s.p & 4 hours	10 L/s.p & 1 hours	0.5 L/s.p & 4 hours	0.5 L/s.p & 1 hours
2	0.9	18	0.685108	10.1408		2	10.1408	10.5882	0.685108	1.46786
4	0.45	9	0.932354	10.2857		16	11.2498	16.6003	2.56767	9.22532
8	0.225	4.5	1.46786	10.5882		32	12.8165	25.0193	4.78393	18.1127
16	0.1125	2.25	2.56767	11.2498		64	16.6003	42.5225	9.22532	35.8897
32	0.05625	1.125	4.78393	12.8165
64	0.028125	0.5625	9.22532	16.6003
128	0.0140625	0.28125	18.1127	25.0193
256	0.00703125	0.140625	35.8897	42.5225
512	0.00351563	0.0703125	71.4448	77.931
1024	0.00175781	0.0351562	142.556	148.966
2048	0.000878906	0.0175781	284.778	291.15
4096	0.000439453	0.00878906	569.222	575.575
8192	0.000219727	0.00439453	1138.11	1144.45
16384	0.000109863	0.00219727	2275.89	2282.23
continued
Exposure time (hr)	1
Volume per person (m3)	ACH at a ventilation rate of 0.5 and 10 L/s.p (h-1)		Effective clean flow rate (L/s.p)
	0.5	10	qc = 0.5 L/s.p	qc = 10 L/s.p
2	0.9	18	1.46786	10.5882
4	0.45	9	2.56767	11.2498
8	0.225	4.5	4.78393	12.8165
16	0.1125	2.25	9.22532	16.6003
32	0.05625	1.125	18.1127	25.0193
64	0.028125	0.5625	35.8897	42.5225
128	0.0140625	0.28125	71.4448	77.931
256	0.00703125	0.140625	142.556	148.966
512	0.00351563	0.0703125	284.778	291.15
1024	0.00175781	0.0351562	569.222	575.575
2048	0.000878906	0.0175781	1138.11	1144.45
4096	0.000439453	0.00878906	2275.89	2282.23
8192	0.000219727	0.00439453	4551.44	4557.78
16384	0.000109863	0.00219727	9102.56	9108.89
