# Supplementary material for: Quantifying crowding-ventilation effect on respiratory infections
Source: Research Square preprint supplement (doi:10.21203/rs.3.rs-7664648/v1), 2025-10-09
Supplement: Supplementary file 8 [file Figure 1e.xlsx]

## Sheet: Figure 1e
Figure 1e. CO2 concentration build-up and decay profiles for two crowding levels, at a ventilation rate of 10 L/s per person and 4-hour co-exposure & 4-hour post-exposure
Time (h)	Continued Hour	Outdoor air change rate (h-1)
		n=20	n=0.5
0	0	400	400
0.01	0.01	545.015	403.99
0.02	0.02	663.744	407.96
0.03	0.03	760.951	411.91
0.04	0.04	840.537	415.841
0.05	0.05	905.696	419.752
0.06	0.06	959.045	423.644
0.07	0.07	1002.72	427.516
0.08	0.08	1038.48	431.368
0.09	0.09	1067.76	435.202
0.1	0.1	1091.73	439.016
0.11	0.11	1111.36	442.812
0.12	0.12	1127.43	446.588
0.13	0.13	1140.58	450.346
0.14	0.14	1151.35	454.085
0.15	0.15	1160.17	457.805
0.16	0.16	1167.39	461.507
0.17	0.17	1173.3	465.19
0.18	0.18	1178.14	468.855
0.19	0.19	1182.1	472.502
0.2	0.2	1185.35	476.13
0.21	0.21	1188	479.74
0.22	0.22	1190.18	483.333
0.23	0.23	1191.96	486.907
0.24	0.24	1193.42	490.464
0.25	0.25	1194.61	494.002
0.26	0.26	1195.59	497.524
0.27	0.27	1196.39	501.027
0.28	0.28	1197.04	504.513
0.29	0.29	1197.58	507.982
0.3	0.3	1198.02	511.434
0.31	0.31	1198.38	514.868
0.32	0.32	1198.67	518.285
0.33	0.33	1198.91	521.685
0.34	0.34	1199.11	525.068
0.35	0.35	1199.27	528.434
0.36	0.36	1199.4	531.784
0.37	0.37	1199.51	535.117
0.38	0.38	1199.6	538.433
0.39	0.39	1199.67	541.732
0.4	0.4	1199.73	545.015
0.41	0.41	1199.78	548.282
0.42	0.42	1199.82	551.533
0.43	0.43	1199.85	554.767
0.44	0.44	1199.88	557.985
0.45	0.45	1199.9	561.187
0.46	0.46	1199.92	564.373
0.47	0.47	1199.93	567.543
0.48	0.48	1199.95	570.698
0.49	0.49	1199.96	573.836
0.5	0.5	1199.96	576.959
0.51	0.51	1199.97	580.067
0.52	0.52	1199.98	583.159
0.53	0.53	1199.98	586.235
0.54	0.54	1199.98	589.296
0.55	0.55	1199.99	592.342
0.56	0.56	1199.99	595.373
0.57	0.57	1199.99	598.389
0.58	0.58	1199.99	601.389
0.59	0.59	1199.99	604.375
0.6	0.6	1200	607.345
0.61	0.61	1200	610.301
0.62	0.62	1200	613.242
0.63	0.63	1200	616.169
0.64	0.64	1200	619.081
0.65	0.65	1200	621.978
0.66	0.66	1200	624.861
0.67	0.67	1200	627.73
0.68	0.68	1200	630.584
0.69	0.69	1200	633.424
0.7	0.7	1200	636.25
0.71	0.71	1200	639.061
0.72	0.72	1200	641.859
0.73	0.73	1200	644.643
0.74	0.74	1200	647.413
0.75	0.75	1200	650.169
0.76	0.76	1200	652.911
0.77	0.77	1200	655.639
0.78	0.78	1200	658.355
0.79	0.79	1200	661.056
0.8	0.8	1200	663.744
0.81	0.81	1200	666.419
0.82	0.82	1200	669.08
0.83	0.83	1200	671.728
0.84	0.84	1200	674.363
0.85	0.85	1200	676.984
0.86	0.86	1200	679.593
0.87	0.87	1200	682.188
0.88	0.88	1200	684.771
0.89	0.89	1200	687.341
0.9	0.9	1200	689.897
0.91	0.91	1200	692.442
0.92	0.92	1200	694.973
0.93	0.93	1200	697.492
0.94	0.94	1200	699.998
0.95	0.95	1200	702.492
0.96	0.96	1200	704.973
0.97	0.97	1200	707.442
0.98	0.98	1200	709.899
0.99	0.99	1200	712.343
1	1	1200	714.775
1.01	1.01	1200	717.196
1.02	1.02	1200	719.604
1.03	1.03	1200	722
1.04	1.04	1200	724.384
1.05	1.05	1200	726.756
1.06	1.06	1200	729.116
1.07	1.07	1200	731.465
1.08	1.08	1200	733.801
1.09	1.09	1200	736.127
1.1	1.1	1200	738.44
1.11	1.11	1200	740.742
1.12	1.12	1200	743.033
1.13	1.13	1200	745.312
1.14	1.14	1200	747.58
1.15	1.15	1200	749.836
1.16	1.16	1200	752.081
1.17	1.17	1200	754.315
1.18	1.18	1200	756.538
1.19	1.19	1200	758.75
1.2	1.2	1200	760.951
1.21	1.21	1200	763.14
1.22	1.22	1200	765.319
1.23	1.23	1200	767.487
1.24	1.24	1200	769.644
1.25	1.25	1200	771.791
1.26	1.26	1200	773.927
1.27	1.27	1200	776.052
1.28	1.28	1200	778.166
1.29	1.29	1200	780.27
1.3	1.3	1200	782.363
1.31	1.31	1200	784.446
1.32	1.32	1200	786.519
1.33	1.33	1200	788.581
1.34	1.34	1200	790.633
1.35	1.35	1200	792.675
1.36	1.36	1200	794.706
1.37	1.37	1200	796.728
1.38	1.38	1200	798.739
1.39	1.39	1200	800.74
1.4	1.4	1200	802.732
1.41	1.41	1200	804.713
1.42	1.42	1200	806.685
1.43	1.43	1200	808.646
1.44	1.44	1200	810.598
1.45	1.45	1200	812.54
1.46	1.46	1200	814.473
1.47	1.47	1200	816.396
1.48	1.48	1200	818.309
1.49	1.49	1200	820.213
1.5	1.5	1200	822.107
1.51	1.51	1200	823.992
1.52	1.52	1200	825.867
1.53	1.53	1200	827.733
1.54	1.54	1200	829.59
1.55	1.55	1200	831.437
1.56	1.56	1200	833.275
1.57	1.57	1200	835.104
1.58	1.58	1200	836.924
1.59	1.59	1200	838.735
1.6	1.6	1200	840.537
1.61	1.61	1200	842.33
1.62	1.62	1200	844.114
1.63	1.63	1200	845.889
1.64	1.64	1200	847.655
1.65	1.65	1200	849.412
1.66	1.66	1200	851.161
1.67	1.67	1200	852.9
1.68	1.68	1200	854.632
1.69	1.69	1200	856.354
1.7	1.7	1200	858.068
1.71	1.71	1200	859.773
1.72	1.72	1200	861.47
1.73	1.73	1200	863.159
1.74	1.74	1200	864.839
1.75	1.75	1200	866.51
1.76	1.76	1200	868.174
1.77	1.77	1200	869.829
1.78	1.78	1200	871.475
1.79	1.79	1200	873.114
1.8	1.8	1200	874.744
1.81	1.81	1200	876.366
1.82	1.82	1200	877.981
1.83	1.83	1200	879.587
1.84	1.84	1200	881.185
1.85	1.85	1200	882.775
1.86	1.86	1200	884.357
1.87	1.87	1200	885.931
1.88	1.88	1200	887.498
1.89	1.89	1200	889.056
1.9	1.9	1200	890.607
1.91	1.91	1200	892.15
1.92	1.92	1200	893.686
1.93	1.93	1200	895.213
1.94	1.94	1200	896.734
1.95	1.95	1200	898.246
1.96	1.96	1200	899.751
1.97	1.97	1200	901.249
1.98	1.98	1200	902.739
1.99	1.99	1200	904.221
2	2	1200	905.696
2.01	2.01	1200	907.164
2.02	2.02	1200	908.625
2.03	2.03	1200	910.078
2.04	2.04	1200	911.524
2.05	2.05	1200	912.963
2.06	2.06	1200	914.394
2.07	2.07	1200	915.819
2.08	2.08	1200	917.236
2.09	2.09	1200	918.647
2.1	2.1	1200	920.05
2.11	2.11	1200	921.446
2.12	2.12	1200	922.835
2.13	2.13	1200	924.218
2.14	2.14	1200	925.593
2.15	2.15	1200	926.962
2.16	2.16	1200	928.324
2.17	2.17	1200	929.679
2.18	2.18	1200	931.027
2.19	2.19	1200	932.368
2.2	2.2	1200	933.703
2.21	2.21	1200	935.031
2.22	2.22	1200	936.353
2.23	2.23	1200	937.668
2.24	2.24	1200	938.976
2.25	2.25	1200	940.278
2.26	2.26	1200	941.573
2.27	2.27	1200	942.862
2.28	2.28	1200	944.145
2.29	2.29	1200	945.421
2.3	2.3	1200	946.691
2.31	2.31	1200	947.954
2.32	2.32	1200	949.211
2.33	2.33	1200	950.462
2.34	2.34	1200	951.706
2.35	2.35	1200	952.945
2.36	2.36	1200	954.177
2.37	2.37	1200	955.403
2.38	2.38	1200	956.623
2.39	2.39	1200	957.837
2.4	2.4	1200	959.045
2.41	2.41	1200	960.246
2.42	2.42	1200	961.442
2.43	2.43	1200	962.632
2.44	2.44	1200	963.816
2.45	2.45	1200	964.994
2.46	2.46	1200	966.166
2.47	2.47	1200	967.332
2.48	2.48	1200	968.493
2.49	2.49	1200	969.647
2.5	2.5	1200	970.796
2.51	2.51	1200	971.939
2.52	2.52	1200	973.077
2.53	2.53	1200	974.209
2.54	2.54	1200	975.335
2.55	2.55	1200	976.455
2.56	2.56	1200	977.57
2.57	2.57	1200	978.68
2.58	2.58	1200	979.783
2.59	2.59	1200	980.882
2.6	2.6	1200	981.975
2.61	2.61	1200	983.062
2.62	2.62	1200	984.144
2.63	2.63	1200	985.221
2.64	2.64	1200	986.292
2.65	2.65	1200	987.358
2.66	2.66	1200	988.418
2.67	2.67	1200	989.473
2.68	2.68	1200	990.523
2.69	2.69	1200	991.568
2.7	2.7	1200	992.608
2.71	2.71	1200	993.642
2.72	2.72	1200	994.671
2.73	2.73	1200	995.695
2.74	2.74	1200	996.714
2.75	2.75	1200	997.728
2.76	2.76	1200	998.737
2.77	2.77	1200	999.741
2.78	2.78	1200	1000.74
2.79	2.79	1200	1001.73
2.8	2.8	1200	1002.72
2.81	2.81	1200	1003.71
2.82	2.82	1200	1004.69
2.83	2.83	1200	1005.66
2.84	2.84	1200	1006.63
2.85	2.85	1200	1007.59
2.86	2.86	1200	1008.55
2.87	2.87	1200	1009.51
2.88	2.88	1200	1010.46
2.89	2.89	1200	1011.4
2.9	2.9	1200	1012.34
2.91	2.91	1200	1013.28
2.92	2.92	1200	1014.21
2.93	2.93	1200	1015.14
2.94	2.94	1200	1016.06
2.95	2.95	1200	1016.98
2.96	2.96	1200	1017.89
2.97	2.97	1200	1018.8
2.98	2.98	1200	1019.7
2.99	2.99	1200	1020.6
3	3	1200	1021.5
3.01	3.01	1200	1022.39
3.02	3.02	1200	1023.27
3.03	3.03	1200	1024.15
3.04	3.04	1200	1025.03
3.05	3.05	1200	1025.9
3.06	3.06	1200	1026.77
3.07	3.07	1200	1027.64
3.08	3.08	1200	1028.5
3.09	3.09	1200	1029.35
3.1	3.1	1200	1030.2
3.11	3.11	1200	1031.05
3.12	3.12	1200	1031.89
3.13	3.13	1200	1032.73
3.14	3.14	1200	1033.56
3.15	3.15	1200	1034.39
3.16	3.16	1200	1035.22
3.17	3.17	1200	1036.04
3.18	3.18	1200	1036.86
3.19	3.19	1200	1037.67
3.2	3.2	1200	1038.48
3.21	3.21	1200	1039.29
3.22	3.22	1200	1040.09
3.23	3.23	1200	1040.89
3.24	3.24	1200	1041.68
3.25	3.25	1200	1042.47
3.26	3.26	1200	1043.26
3.27	3.27	1200	1044.04
3.28	3.28	1200	1044.82
3.29	3.29	1200	1045.59
3.3	3.3	1200	1046.36
3.31	3.31	1200	1047.13
3.32	3.32	1200	1047.89
3.33	3.33	1200	1048.65
3.34	3.34	1200	1049.4
3.35	3.35	1200	1050.15
3.36	3.36	1200	1050.9
3.37	3.37	1200	1051.64
3.38	3.38	1200	1052.38
3.39	3.39	1200	1053.12
3.4	3.4	1200	1053.85
3.41	3.41	1200	1054.58
3.42	3.42	1200	1055.31
3.43	3.43	1200	1056.03
3.44	3.44	1200	1056.75
3.45	3.45	1200	1057.46
3.46	3.46	1200	1058.17
3.47	3.47	1200	1058.88
3.48	3.48	1200	1059.58
3.49	3.49	1200	1060.28
3.5	3.5	1200	1060.98
3.51	3.51	1200	1061.67
3.52	3.52	1200	1062.36
3.53	3.53	1200	1063.05
3.54	3.54	1200	1063.73
3.55	3.55	1200	1064.41
3.56	3.56	1200	1065.09
3.57	3.57	1200	1065.76
3.58	3.58	1200	1066.43
3.59	3.59	1200	1067.1
3.6	3.6	1200	1067.76
3.61	3.61	1200	1068.42
3.62	3.62	1200	1069.08
3.63	3.63	1200	1069.73
3.64	3.64	1200	1070.38
3.65	3.65	1200	1071.03
3.66	3.66	1200	1071.67
3.67	3.67	1200	1072.31
3.68	3.68	1200	1072.95
3.69	3.69	1200	1073.58
3.7	3.7	1200	1074.21
3.71	3.71	1200	1074.84
3.72	3.72	1200	1075.46
3.73	3.73	1200	1076.08
3.74	3.74	1200	1076.7
3.75	3.75	1200	1077.32
3.76	3.76	1200	1077.93
3.77	3.77	1200	1078.54
3.78	3.78	1200	1079.14
3.79	3.79	1200	1079.75
3.8	3.8	1200	1080.35
3.81	3.81	1200	1080.94
3.82	3.82	1200	1081.54
3.83	3.83	1200	1082.13
3.84	3.84	1200	1082.71
3.85	3.85	1200	1083.3
3.86	3.86	1200	1083.88
3.87	3.87	1200	1084.46
3.88	3.88	1200	1085.04
3.89	3.89	1200	1085.61
3.9	3.9	1200	1086.18
3.91	3.91	1200	1086.75
3.92	3.92	1200	1087.31
3.93	3.93	1200	1087.88
3.94	3.94	1200	1088.43
3.95	3.95	1200	1088.99
3.96	3.96	1200	1089.54
3.97	3.97	1200	1090.1
3.98	3.98	1200	1090.64
3.99	3.99	1200	1091.19
4	4	1200	1091.73
4.01	0.01	1054.98	1088.28
4.02	0.02	936.256	1084.85
4.03	0.03	839.049	1081.43
4.04	0.04	759.463	1078.03
4.05	0.05	694.304	1074.65
4.06	0.06	640.955	1071.29
4.07	0.07	597.278	1067.94
4.08	0.08	561.517	1064.61
4.09	0.09	532.239	1061.29
4.1	0.1	508.268	1058
4.11	0.11	488.643	1054.71
4.12	0.12	472.574	1051.45
4.13	0.13	459.419	1048.2
4.14	0.14	448.648	1044.97
4.15	0.15	439.83	1041.75
4.16	0.16	432.61	1038.55
4.17	0.17	426.699	1035.36
4.18	0.18	421.859	1032.2
4.19	0.19	417.897	1029.04
4.2	0.2	414.653	1025.9
4.21	0.21	411.996	1022.78
4.22	0.22	409.822	1019.68
4.23	0.23	408.041	1016.59
4.24	0.24	406.584	1013.51
4.25	0.25	405.39	1010.45
4.26	0.26	404.413	1007.41
4.27	0.27	403.613	1004.38
4.28	0.28	402.958	1001.36
4.29	0.29	402.422	998.363
4.3	0.3	401.983	995.379
4.31	0.31	401.624	992.41
4.32	0.32	401.329	989.455
4.33	0.33	401.088	986.515
4.34	0.34	400.891	983.59
4.35	0.35	400.73	980.679
4.36	0.36	400.597	977.783
4.37	0.37	400.489	974.901
4.38	0.38	400.4	972.034
4.39	0.39	400.328	969.181
4.4	0.4	400.268	966.342
4.41	0.41	400.22	963.517
4.42	0.42	400.18	960.707
4.43	0.43	400.147	957.91
4.44	0.44	400.121	955.128
4.45	0.45	400.099	952.359
4.46	0.46	400.081	949.604
4.47	0.47	400.066	946.863
4.48	0.48	400.054	944.135
4.49	0.49	400.044	941.422
4.5	0.5	400.036	938.721
4.51	0.51	400.03	936.034
4.52	0.52	400.024	933.361
4.53	0.53	400.02	930.701
4.54	0.54	400.016	928.054
4.55	0.55	400.013	925.42
4.56	0.56	400.011	922.8
4.57	0.57	400.009	920.192
4.58	0.58	400.007	917.598
4.59	0.59	400.006	915.016
4.6	0.6	400.005	912.448
4.61	0.61	400.004	909.892
4.62	0.62	400.003	907.349
4.63	0.63	400.003	904.818
4.64	0.64	400.002	902.3
4.65	0.65	400.002	899.795
4.66	0.66	400.001	897.302
4.67	0.67	400.001	894.822
4.68	0.68	400.001	892.354
4.69	0.69	400.001	889.899
4.7	0.7	400.001	887.455
4.71	0.71	400.001	885.024
4.72	0.72	400	882.605
4.73	0.73	400	880.198
4.74	0.74	400	877.803
4.75	0.75	400	875.42
4.76	0.76	400	873.049
4.77	0.77	400	870.689
4.78	0.78	400	868.342
4.79	0.79	400	866.006
4.8	0.8	400	863.682
4.81	0.81	400	861.369
4.82	0.82	400	859.068
4.83	0.83	400	856.778
4.84	0.84	400	854.5
4.85	0.85	400	852.233
4.86	0.86	400	849.978
4.87	0.87	400	847.734
4.88	0.88	400	845.5
4.89	0.89	400	843.279
4.9	0.9	400	841.068
4.91	0.91	400	838.868
4.92	0.92	400	836.679
4.93	0.93	400	834.501
4.94	0.94	400	832.334
4.95	0.95	400	830.178
4.96	0.96	400	828.032
4.97	0.97	400	825.897
4.98	0.98	400	823.773
4.99	0.99	400	821.66
5	1	400	819.557
5.01	1.01	400	817.464
5.02	1.02	400	815.382
5.03	1.03	400	813.31
5.04	1.04	400	811.249
5.05	1.05	400	809.198
5.06	1.06	400	807.157
5.07	1.07	400	805.126
5.08	1.08	400	803.105
5.09	1.09	400	801.095
5.1	1.1	400	799.095
5.11	1.11	400	797.104
5.12	1.12	400	795.123
5.13	1.13	400	793.153
5.14	1.14	400	791.192
5.15	1.15	400	789.241
5.16	1.16	400	787.299
5.17	1.17	400	785.368
5.18	1.18	400	783.446
5.19	1.19	400	781.533
5.2	1.2	400	779.63
5.21	1.21	400	777.737
5.22	1.22	400	775.853
5.23	1.23	400	773.978
5.24	1.24	400	772.113
5.25	1.25	400	770.257
5.26	1.26	400	768.411
5.27	1.27	400	766.573
5.28	1.28	400	764.745
5.29	1.29	400	762.926
5.3	1.3	400	761.116
5.31	1.31	400	759.315
5.32	1.32	400	757.522
5.33	1.33	400	755.739
5.34	1.34	400	753.965
5.35	1.35	400	752.2
5.36	1.36	400	750.443
5.37	1.37	400	748.695
5.38	1.38	400	746.956
5.39	1.39	400	745.226
5.4	1.4	400	743.504
5.41	1.41	400	741.791
5.42	1.42	400	740.086
5.43	1.43	400	738.39
5.44	1.44	400	736.702
5.45	1.45	400	735.023
5.46	1.46	400	733.352
5.47	1.47	400	731.689
5.48	1.48	400	730.035
5.49	1.49	400	728.389
5.5	1.5	400	726.751
5.51	1.51	400	725.121
5.52	1.52	400	723.5
5.53	1.53	400	721.886
5.54	1.54	400	720.281
5.55	1.55	400	718.683
5.56	1.56	400	717.094
5.57	1.57	400	715.512
5.58	1.58	400	713.939
5.59	1.59	400	712.373
5.6	1.6	400	710.815
5.61	1.61	400	709.265
5.62	1.62	400	707.722
5.63	1.63	400	706.188
5.64	1.64	400	704.661
5.65	1.65	400	703.141
5.66	1.66	400	701.629
5.67	1.67	400	700.125
5.68	1.68	400	698.628
5.69	1.69	400	697.138
5.7	1.7	400	695.656
5.71	1.71	400	694.182
5.72	1.72	400	692.715
5.73	1.73	400	691.255
5.74	1.74	400	689.802
5.75	1.75	400	688.357
5.76	1.76	400	686.919
5.77	1.77	400	685.488
5.78	1.78	400	684.064
5.79	1.79	400	682.647
5.8	1.8	400	681.237
5.81	1.81	400	679.834
5.82	1.82	400	678.439
5.83	1.83	400	677.05
5.84	1.84	400	675.668
5.85	1.85	400	674.293
5.86	1.86	400	672.925
5.87	1.87	400	671.564
5.88	1.88	400	670.21
5.89	1.89	400	668.862
5.9	1.9	400	667.521
5.91	1.91	400	666.187
5.92	1.92	400	664.859
5.93	1.93	400	663.538
5.94	1.94	400	662.224
5.95	1.95	400	660.916
5.96	1.96	400	659.615
5.97	1.97	400	658.32
5.98	1.98	400	657.031
5.99	1.99	400	655.749
6	2	400	654.474
6.01	2.01	400	653.205
6.02	2.02	400	651.942
6.03	2.03	400	650.685
6.04	2.04	400	649.435
6.05	2.05	400	648.191
6.06	2.06	400	646.953
6.07	2.07	400	645.721
6.08	2.08	400	644.496
6.09	2.09	400	643.276
6.1	2.1	400	642.063
6.11	2.11	400	640.856
6.12	2.12	400	639.654
6.13	2.13	400	638.459
6.14	2.14	400	637.27
6.15	2.15	400	636.087
6.16	2.16	400	634.909
6.17	2.17	400	633.737
6.18	2.18	400	632.572
6.19	2.19	400	631.412
6.2	2.2	400	630.258
6.21	2.21	400	629.109
6.22	2.22	400	627.966
6.23	2.23	400	626.829
6.24	2.24	400	625.698
6.25	2.25	400	624.572
6.26	2.26	400	623.452
6.27	2.27	400	622.338
6.28	2.28	400	621.229
6.29	2.29	400	620.126
6.3	2.3	400	619.028
6.31	2.31	400	617.935
6.32	2.32	400	616.848
6.33	2.33	400	615.767
6.34	2.34	400	614.691
6.35	2.35	400	613.62
6.36	2.36	400	612.554
6.37	2.37	400	611.494
6.38	2.38	400	610.44
6.39	2.39	400	609.39
6.4	2.4	400	608.346
6.41	2.41	400	607.306
6.42	2.42	400	606.273
6.43	2.43	400	605.244
6.44	2.44	400	604.22
6.45	2.45	400	603.202
6.46	2.46	400	602.188
6.47	2.47	400	601.18
6.48	2.48	400	600.176
6.49	2.49	400	599.178
6.5	2.5	400	598.184
6.51	2.51	400	597.196
6.52	2.52	400	596.213
6.53	2.53	400	595.234
6.54	2.54	400	594.26
6.55	2.55	400	593.291
6.56	2.56	400	592.327
6.57	2.57	400	591.368
6.58	2.58	400	590.414
6.59	2.59	400	589.464
6.6	2.6	400	588.519
6.61	2.61	400	587.579
6.62	2.62	400	586.643
6.63	2.63	400	585.712
6.64	2.64	400	584.786
6.65	2.65	400	583.864
6.66	2.66	400	582.947
6.67	2.67	400	582.035
6.68	2.68	400	581.127
6.69	2.69	400	580.224
6.7	2.7	400	579.325
6.71	2.71	400	578.43
6.72	2.72	400	577.54
6.73	2.73	400	576.655
6.74	2.74	400	575.774
6.75	2.75	400	574.897
6.76	2.76	400	574.025
6.77	2.77	400	573.157
6.78	2.78	400	572.293
6.79	2.79	400	571.434
6.8	2.8	400	570.579
6.81	2.81	400	569.728
6.82	2.82	400	568.882
6.83	2.83	400	568.039
6.84	2.84	400	567.201
6.85	2.85	400	566.367
6.86	2.86	400	565.538
6.87	2.87	400	564.712
6.88	2.88	400	563.89
6.89	2.89	400	563.073
6.9	2.9	400	562.26
6.91	2.91	400	561.45
6.92	2.92	400	560.645
6.93	2.93	400	559.844
6.94	2.94	400	559.047
6.95	2.95	400	558.254
6.96	2.96	400	557.464
6.97	2.97	400	556.679
6.98	2.98	400	555.897
6.99	2.99	400	555.12
7	3	400	554.346
7.01	3.01	400	553.576
7.02	3.02	400	552.81
7.03	3.03	400	552.048
7.04	3.04	400	551.29
7.05	3.05	400	550.535
7.06	3.06	400	549.785
7.07	3.07	400	549.038
7.08	3.08	400	548.294
7.09	3.09	400	547.555
7.1	3.1	400	546.819
7.11	3.11	400	546.086
7.12	3.12	400	545.358
7.13	3.13	400	544.633
7.14	3.14	400	543.911
7.15	3.15	400	543.194
7.16	3.16	400	542.48
7.17	3.17	400	541.769
7.18	3.18	400	541.062
7.19	3.19	400	540.358
7.2	3.2	400	539.658
7.21	3.21	400	538.962
7.22	3.22	400	538.269
7.23	3.23	400	537.579
7.24	3.24	400	536.893
7.25	3.25	400	536.21
7.26	3.26	400	535.531
7.27	3.27	400	534.855
7.28	3.28	400	534.182
7.29	3.29	400	533.513
7.3	3.3	400	532.847
7.31	3.31	400	532.184
7.32	3.32	400	531.525
7.33	3.33	400	530.869
7.34	3.34	400	530.216
7.35	3.35	400	529.567
7.36	3.36	400	528.921
7.37	3.37	400	528.278
7.38	3.38	400	527.638
7.39	3.39	400	527.001
7.4	3.4	400	526.368
7.41	3.41	400	525.738
7.42	3.42	400	525.111
7.43	3.43	400	524.487
7.44	3.44	400	523.866
7.45	3.45	400	523.248
7.46	3.46	400	522.633
7.47	3.47	400	522.022
7.48	3.48	400	521.413
7.49	3.49	400	520.807
7.5	3.5	400	520.205
7.51	3.51	400	519.605
7.52	3.52	400	519.009
7.53	3.53	400	518.415
7.54	3.54	400	517.825
7.55	3.55	400	517.237
7.56	3.56	400	516.652
7.57	3.57	400	516.071
7.58	3.58	400	515.492
7.59	3.59	400	514.916
7.6	3.6	400	514.342
7.61	3.61	400	513.772
7.62	3.62	400	513.205
7.63	3.63	400	512.64
7.64	3.64	400	512.078
7.65	3.65	400	511.519
7.66	3.66	400	510.963
7.67	3.67	400	510.41
7.68	3.68	400	509.859
7.69	3.69	400	509.311
7.7	3.7	400	508.766
7.71	3.71	400	508.223
7.72	3.72	400	507.684
7.73	3.73	400	507.147
7.74	3.74	400	506.612
7.75	3.75	400	506.081
7.76	3.76	400	505.551
7.77	3.77	400	505.025
7.78	3.78	400	504.501
7.79	3.79	400	503.98
7.8	3.8	400	503.461
7.81	3.81	400	502.945
7.82	3.82	400	502.432
7.83	3.83	400	501.921
7.84	3.84	400	501.413
7.85	3.85	400	500.907
7.86	3.86	400	500.404
7.87	3.87	400	499.903
7.88	3.88	400	499.405
7.89	3.89	400	498.909
7.9	3.9	400	498.415
7.91	3.91	400	497.925
7.92	3.92	400	497.436
7.93	3.93	400	496.95
7.94	3.94	400	496.467
7.95	3.95	400	495.986
7.96	3.96	400	495.507
7.97	3.97	400	495.031
7.98	3.98	400	494.557
7.99	3.99	400	494.085
8	4	400	493.616
