# Supplementary material for: Quantifying crowding-ventilation effect on respiratory infections
Source: Research Square preprint supplement (doi:10.21203/rs.3.rs-7664648/v1), 2025-10-09
Supplement: Supplementary file 10 [file Figure 1f.xlsx]

## Sheet: ventilation vs VTAC
Table 1. Effective clean flow rate, physical clean flow rate and VTAC asymptote for various crowding levels, at a ventilation rate of 10 L/s per person, and 4 hours co-exposure and 0-, 1- and 2-hour post-exposure periods.
Exposure time (hr)	4
Volume per person (m3)	ACH at a ventilation rate of 10 L/s.p (h-1)	Combinations of ventilation rate & co- and post-exposure time			Clean air equivalent (L/s.p)	VTAC asymptote (L/s.p)
	10	4 h, qc = 10 L/s.p	4+1 h, qc = 10 L/s.p	4+2 h, qc = 10 L/s.p		4h co-exposure	4+1 h co-&post-exposure	4+2 h co-&post-exposure
2	18	10.1408	10	10	10	na	na	na
4	9	10.2857	10	10	10	na	na	na
8	4.5	10.5882	10.0062	10.0001	10	na	na	na
15	2.4	11.1627	10.0954	10.0086	10	na	na	na
16	2.25	11.2498	10.1185	10.0124	10	na	na	na
32	1.125	12.8165	10.7682	10.2371	10	na	na	na
40	0.9	13.7022	11.2341	10.4675	10	na	na	na
80	0.45	18.6471	14.1981	12.3234	10	na	na	na
160	0.225	29.3571	21.12	17.2542	na	na	na	na
320	0.1125	51.3534	35.6618	28.0129	na	44.4444	na	na
640	0.05625	95.6786	65.1479	50.0505	na	88.8889	59.2593	na
1000	0.036	145.635	98.4284	74.9828	na	138.889	92.5926	na
1280	0.028125	184.506	124.334	94.4008	na	177.778	118.519	88.8889
2560	0.0140625	362.253	242.815	183.242	na	355.556	237.037	177.778
5120	0.00703125	717.793	479.834	360.996	na	711.111	474.074	355.556
10240	0.00351563	1428.9	953.898	716.54	na	1422.22	948.148	711.111
20480	0.00175781	2851.12	1902.04	1427.64	na	2844.44	1896.3	1422.22
40960	0.000878906	5695.56	3798.34	2849.86	na	5688.89	3792.59	2844.44
81920	0.000439453	11384.4	7590.93	5694.31	na	11377.8	7585.19	5688.89
163840	0.000219727	22762.2	15176.1	11383.2	na	22755.6	15170.4	11377.8
327680	0.000109863	45517.8	30346.5	22761	na	45511.1	30340.7	22755.6
655360	5.49316e-05	91028.9	60687.2	45516.5	na	91022.2	60681.5	45511.1
1310720	2.74658e-05	182051	121369	91027.6	na	182044	121363	91022.2
