# Supplementary material for: Quantifying crowding-ventilation effect on respiratory infections
Source: Research Square preprint supplement (doi:10.21203/rs.3.rs-7664648/v1), 2025-10-09
Supplement: Supplementary file 12 [file Figure 2a.xlsx]

## Sheet: Intake fraction time Fig2a
Table 1. Intake fraction time for various crowding levels, at ventilation rates of 0.5, 10 and 100 L/s person, a co-exposure of 1 and 4 hours and an inhalation flow rate of 0.1 L/s.
Exposure time (hr):	1			Inhalation flow rate (L/s):	0.1
Volume per person (m3)	ACH at a ventilation rate of 0.5, 10 and 100 L/s.p (h-1)			Intake fraction time (hr)
	0.5	10	100	qc = 0.5 L/s.p	qc = 10 L/s.p	qc = 100 L/s.p
2	0.9	18	180	0.0681266	0.00944444	0.000994444
4	0.45	9	90	0.0389458	0.00888903	0.000988889
8	0.225	4.5	45	0.0209033	0.00780246	0.000977778
16	0.1125	2.25	22.5	0.0108397	0.006024	0.000955556
32	0.05625	1.125	11.25	0.005521	0.00399691	0.000911112
64	0.028125	0.5625	5.625	0.00278632	0.00235169	0.000822863
128	0.0140625	0.28125	2.8125	0.00139968	0.00128319	0.000665797
256	0.00703125	0.140625	1.40625	0.00070148	0.000671293	0.000463154
512	0.00351563	0.0703125	0.703125	0.000351151	0.000343466	0.000281829
1024	0.00175781	0.0351562	0.351562	0.000175678	0.000173739	0.000156872
2048	0.000878906	0.0175781	0.175781	8.78649e-05	8.73779e-05	8.29594e-05
4096	0.000439453	0.00878906	0.0878906	4.39389e-05	4.38168e-05	4.26857e-05
8192	0.000219727	0.00439453	0.0439453	2.1971e-05	2.19405e-05	2.16543e-05
16384	0.000109863	0.00219727	0.0219727	1.09859e-05	1.09783e-05	1.09063e-05
Continued
Exposure time (hr):	4			Inhalation flow rate (L/s):	0.1
Volume per person (m3)	ACH at a ventilation rate of 0.5, 10 and 100 L/s.p (h-1)			Intake fraction time (hr)
	0.5	10	100	qc = 0.5 L/s.p	qc = 10 L/s.p	qc = 100 L/s.p
2	0.9	18	180	0.58385	0.0394444	0.00399444
4	0.45	9	90	0.429022	0.0388889	0.00398889
8	0.225	4.5	45	0.272506	0.0377778	0.00397778
16	0.1125	2.25	22.5	0.155783	0.0355561	0.00395556
32	0.05625	1.125	11.25	0.0836132	0.0312099	0.00391111
64	0.028125	0.5625	5.625	0.0433589	0.024096	0.00382222
128	0.0140625	0.28125	2.8125	0.022084	0.0159876	0.00364445
256	0.00703125	0.140625	1.40625	0.0111453	0.00940678	0.00329145
512	0.00351563	0.0703125	0.703125	0.00559873	0.00513274	0.00266319
1024	0.00175781	0.0351562	0.351562	0.00280592	0.00268517	0.00185262
2048	0.000878906	0.0175781	0.175781	0.0014046	0.00137386	0.00112732
4096	0.000439453	0.00878906	0.0878906	0.000702713	0.000694957	0.000627489
8192	0.000219727	0.00439453	0.0439453	0.00035146	0.000349512	0.000331837
16384	0.000109863	0.00219727	0.0219727	0.000175756	0.000175267	0.000170743
32768	5.49316e-05	0.00109863	0.0109863	8.78842e-05	8.7762e-05	8.66172e-05
65536	2.74658e-05	0.000549316	0.00549316	4.39437e-05	4.39131e-05	4.36252e-05
131072	1.37329e-05	0.000274658	0.00274658	2.19723e-05	2.19646e-05	2.18924e-05
262144	6.86646e-06	0.000137329	0.00137329	1.09862e-05	1.09843e-05	1.09662e-05
524288	3.43323e-06	6.86646e-05	0.000686646	5.49314e-06	5.49266e-06	5.48814e-06
1048576	1.71661e-06	3.43323e-05	0.000343323	2.74658e-06	2.74646e-06	2.74533e-06
