# Supplementary material for: Quantifying crowding-ventilation effect on respiratory infections
Source: Research Square preprint supplement (doi:10.21203/rs.3.rs-7664648/v1), 2025-10-09
Supplement: Supplementary file 14 [file Figure 2b.xlsx]

## Sheet: Intake fraction time Fig2a
Table 1. Intake fraction time for various crowding levels, at ventilation rates of 0.5 and 10 L/s person, two co-exposure time of 1 and 4 hours, and an inhalation flow rate of 0.1 L/s.									Table 2. Intake fraction time for typical crowding levels of 2, 16, 32 and 64 m3/person, at ventilation rates of 0.5 and 10 L/s person, and a co-exposure of 1 and 4 hours (extracted from Table 1 and provide completed data for Figure 2b).
Exposure time (hr)	1		Inhalation flow rate (L/s):	0.1
Volume per person (m3)	ACH at a ventilation rate of 0.5 and 10 L/s.p (h-1)		Intake fraction time (hr)						Volume per person (m3)	Intake fraction time for combinations of ventilation rate & exposure time
	0.5	10	qc = 0.5 L/s.p	qc = 10 L/s.p						10 L/s.p & 4 hours	10 L/s.p & 1 hours	0.5 L/s.p & 4 hours	0.5 L/s.p & 1 hours
2	0.9	18	0.0681266	0.00944444					2	0.0394444	0.00944444	0.58385	0.0681266
4	0.45	9	0.0389458	0.00888903					16	0.0355561	0.006024	0.155783	0.0108397
8	0.225	4.5	0.0209033	0.00780246					32	0.0312099	0.00399691	0.0836132	0.005521
16	0.1125	2.25	0.0108397	0.006024					64	0.024096	0.00235169	0.0433589	0.00278632
32	0.05625	1.125	0.005521	0.00399691
64	0.028125	0.5625	0.00278632	0.00235169
128	0.0140625	0.28125	0.00139968	0.00128319
256	0.00703125	0.140625	0.00070148	0.000671293
512	0.00351563	0.0703125	0.000351151	0.000343466
1024	0.00175781	0.0351562	0.000175678	0.000173739
2048	0.000878906	0.0175781	8.78649e-05	8.73779e-05
4096	0.000439453	0.00878906	4.39389e-05	4.38168e-05
8192	0.000219727	0.00439453	2.1971e-05	2.19405e-05
16384	0.000109863	0.00219727	1.09859e-05	1.09783e-05
Continued
Exposure time (hr)	4		Inhalation flow rate (L/s):	0.1
Volume per person (m3)	ACH at a ventilation rate of 0.5 and 10 L/s.p (h-1)		Intake fraction time (hr)
	0.5	10	qc = 0.5 L/s.p	qc = 10 L/s.p
2	0.9	18	0.58385	0.0394444
4	0.45	9	0.429022	0.0388889
8	0.225	4.5	0.272506	0.0377778
16	0.1125	2.25	0.155783	0.0355561
32	0.05625	1.125	0.0836132	0.0312099
64	0.028125	0.5625	0.0433589	0.024096
128	0.0140625	0.28125	0.022084	0.0159876
256	0.00703125	0.140625	0.0111453	0.00940678
512	0.00351563	0.0703125	0.00559873	0.00513274
1024	0.00175781	0.0351562	0.00280592	0.00268517
2048	0.000878906	0.0175781	0.0014046	0.00137386
4096	0.000439453	0.00878906	0.000702713	0.000694957
8192	0.000219727	0.00439453	0.00035146	0.000349512
16384	0.000109863	0.00219727	0.000175756	0.000175267
32768	5.49316e-05	0.00109863	8.78842e-05	8.7762e-05
65536	2.74658e-05	0.000549316	4.39437e-05	4.39131e-05
131072	1.37329e-05	0.000274658	2.19723e-05	2.19646e-05
262144	6.86646e-06	0.000137329	1.09862e-05	1.09843e-05
524288	3.43323e-06	6.86646e-05	5.49314e-06	5.49266e-06
1048576	1.71661e-06	3.43323e-05	2.74658e-06	2.74646e-06
