# Supplementary material for: Quantifying crowding-ventilation effect on respiratory infections
Source: Research Square preprint supplement (doi:10.21203/rs.3.rs-7664648/v1), 2025-10-09
Supplement: Supplementary file 16 [file Figure 2c.xlsx]

## Sheet: Incidence vs spaciousness Fig2c
Table 1. Incidence rates of acute respiratory infections (#/10,000 person-day) versus spaciousness in earthquake shelters, collected from Kawano et al. (2016)
Area (m2)	Volume (m3)	Incidence /10000 persons per day	normalized Incidence /10000 person-day
1	3	30	0.86121
2.2	6.6	16	0.459312
3	9	15	0.430605
4	12	16	0.459312
6	18	10	0.28707
8	24	12	0.4
10	30	3	0.1
11	33	1	0.0333333
Kawano, T., Tsugawa, Y., Nishiyama, K., Morita, H., Yamamura, O. and Hasegawa, K., 2016. Shelter crowding and increased incidence of acute respiratory infection in evacuees following the Great Eastern Japan Earthquake and tsunami. Epidemiology & Infection, 144(4), 787–795.



[truncated: 4 more columns]
