# Supplementary material for: Quantifying crowding-ventilation effect on respiratory infections
Source: Research Square preprint supplement (doi:10.21203/rs.3.rs-7664648/v1), 2025-10-09
Supplement: Supplementary file 18 [file Figure 2d.xlsx]

## Sheet: Infectino risk Fig2d
Kawano et al., 2016 (Earthquake shelters, ARI)
Area (m2)	Volume (m3)	Incidence /10000 persons per day	normalized Incidence /10000 person-day
1	3	30	0.86121
2.2	6.6	16	0.459312
3	9	15	0.430605
4	12	16	0.459312
6	18	10	0.28707
8	24	12	0.344484
10	30	3	0.086121
11	33	1	0.028707
Kawano, T., Tsugawa, Y., Nishiyama, K., Morita, H., Yamamura, O. and Hasegawa, K., 2016. Shelter crowding and increased incidence of acute respiratory infection in evacuees following the Great Eastern Japan Earthquake and tsunami. Epidemiology & Infection, 144(4), 787–795.
Walker and Gordon, 1980 (Army camps, influenza)
Area (sq ft)	Area (m2)	Volume (m3)	Proportion influenza	Porportion (normalized)
55	5.10966	12.7742	24.5	0.51763
59	5.48128	13.7032	20.8	0.439457
68	6.3174	15.7935	19.3	0.407766
103	9.56901	23.9225	13.6	0.287337
114	10.5909	26.4774	9.8	0.207052
Walker Jr, B. and Gordon, T., 1980. Health and high density confinement in jails and prisons. Federal Probation, 44(1), 53–58.
Aligne, 2016 (Army camps, influenza)
Area (sq ft)	Area (m2)	Volume (m3)	Incidence per 1000	normalized Incidence per 1000
45	4.18063	10.0335	267	0.544251
46	4.27354	10.2565	286	0.58298
47	4.36644	10.4795	160	0.326143
50	4.64515	11.1484	90.5	0.184474
70	6.50321	15.6077	87.7	0.178767
75	6.96772	16.7225	74	0.150841
78.5	7.29289	17.5029	25.4	0.0517751
Aligne, C.A., 2016. Overcrowding and mortality during the influenza pandemic of 1918: Evidence from US Army Campus AA Humphreys, Virginia. American Journal of Public Health, 106(4), 642–644.
Hoge et al. 1994 (Pheumococcal, jail)
Area (sq ft)	Area (m2)	Volume (m3)	attack rate	Porportion (normalized)
28	2.60128	6.50321	4.4	0.411828
31	2.87999	7.19998	7.3	0.68326
45	4.18063	10.4516	3.1	0.290152
73	6.78192	16.9548	0	0
Hoge, C.W., Reichler, M.R., Dominguez, E.A., Bremer, J.C., Mastro, T.D., Hendricks, K.A., Musher, D.M., Elliott, J.A., Facklam, R.R. and Breiman, R.F., 1994. An epidemic of pneumococcal disease in an overcrowded, inadequately ventilated jail. New England Journal of Medicine, 331(10), 643–648.
Leibowitz et al. (2021) (Prisons, COVID-19)				Design criteria and planning guidelines: 60 sq ft
density	Area (sq ft)	Area (m2)	Volume (m3)	attack rate	Porportion (normalized)
0.7	85.7143	7.96311	19.9078	1900	0.2375
0.85	70.5882	6.55786	16.3946	3000	0.375
1.05	57.1429	5.30874	13.2719	4050	0.50625
Leibowitz, A.I., Siedner, M.J., Tsai, A.C. and Mohareb, A.M., 2021. Association between prison crowding and COVID-19 incidence rates in Massachusetts prisons, April 2020-January 2021. JAMA Internal Medicine, 181(10), 1315–1321.
Sun et al (2011) (Domitorties, common cold)
Persons per room	Area (sq ft)	Area (m2)	Volume (m3)	Incidences >10 times	Porportion (normalized)
3	6.66667	6.66667	16.6667	478.7	0.560717
4	5	5	12.5	471.8	0.552635
5	4	4	10	503.7	0.59
Sun, Y., Wang, Z., Zhang, Y. and Sundell, J., 2011. In China, students in crowded dormitories with a low ventilation rate have more common colds: evidence for airborne transmission. PloS One, 6(11), p.e27140.
Table 1. Modeling simulations for various crowding levels, at a ventilation rate of 0.5 L/s.p, and exposure time of 4 and 12 hours.
Volume per person (m3)	ACH at a ventilation rate of 0.5 L/s.p (h-1)	Infection risk at exposure time of 12 and 4 hours
	0.5	12	4
0.4	4.5	0.981481	0.944444
0.6	3	0.972222	0.916667
0.8	2.25	0.962963	0.888903
1	1.8	0.953704	0.861215
1.2	1.5	0.944444	0.833746
1.4	1.28571	0.935185	0.806691
1.6	1.125	0.925926	0.780246
1.8	1	0.916667	0.754579
2	0.9	0.907409	0.729812
2.2	0.818182	0.898154	0.706026
2.4	0.75	0.888903	0.683262
2.6	0.692308	0.879659	0.661534
2.8	0.642857	0.870428	0.640832
3	0.6	0.861215	0.621132
3.2	0.5625	0.852025	0.6024
3.4	0.529412	0.842867	0.584593
3.6	0.5	0.833746	0.567668
3.8	0.473684	0.824672	0.551578
4	0.45	0.815651	0.536277
4.2	0.428571	0.806691	0.521721
4.4	0.409091	0.797799	0.507864
4.5	0.4	0.793381	0.501185
4.6	0.391304	0.788982	0.494666
4.8	0.375	0.780246	0.482087
5	0.36	0.771597	0.470089
5.2	0.346154	0.76304	0.458637
5.4	0.333333	0.754579	0.447698
5.6	0.321429	0.746218	0.437241
5.8	0.310345	0.737962	0.427238
6	0.3	0.729812	0.417662
6.2	0.290323	0.721772	0.408487
6.4	0.28125	0.713842	0.399691
6.6	0.272727	0.706026	0.391252
6.8	0.264706	0.698323	0.383149
7	0.257143	0.690735	0.375364
7.2	0.25	0.683262	0.367879
7.4	0.243243	0.675905	0.360679
7.6	0.236842	0.668662	0.353747
7.8	0.230769	0.661534	0.347069
8	0.225	0.654521	0.340633
8.2	0.219512	0.64762	0.334425
8.4	0.214286	0.640832	0.328435
8.6	0.209302	0.634156	0.322651
8.8	0.204545	0.62759	0.317063
9	0.2	0.621132	0.311661
9.2	0.195652	0.614783	0.306437
9.4	0.191489	0.608539	0.301382
9.6	0.1875	0.6024	0.296489
9.8	0.183673	0.596363	0.291749
10	0.18	0.590428	0.287156
10.2	0.176471	0.584593	0.282703
10.4	0.173077	0.578855	0.278384
10.6	0.169811	0.573214	0.274194
10.8	0.166667	0.567668	0.270126
11	0.163636	0.562214	0.266175
11.2	0.160714	0.556851	0.262337
11.4	0.157895	0.551578	0.258607
11.6	0.155172	0.546392	0.25498
11.8	0.152542	0.541292	0.251452
12	0.15	0.536277	0.248019
12.2	0.147541	0.531344	0.244678
12.4	0.145161	0.526493	0.241425
12.6	0.142857	0.521721	0.238257
12.8	0.140625	0.517026	0.235169
13	0.138462	0.512408	0.23216
13.2	0.136364	0.507864	0.229227
13.4	0.134328	0.503394	0.226366
13.6	0.132353	0.498995	0.223575
13.8	0.130435	0.494666	0.220851
14	0.128571	0.490406	0.218192
14.2	0.126761	0.486213	0.215597
14.4	0.125	0.482087	0.213061
14.6	0.123288	0.478025	0.210585
14.8	0.121622	0.474026	0.208164
15	0.12	0.470089	0.205799
15.2	0.118421	0.466212	0.203486
15.4	0.116883	0.462395	0.201224
15.6	0.115385	0.458637	0.199012
15.8	0.113924	0.454935	0.196847
16	0.1125	0.451289	0.194729
16.2	0.111111	0.447698	0.192656
16.4	0.109756	0.44416	0.190626
16.6	0.108434	0.440675	0.188638
16.8	0.107143	0.437241	0.186691
17	0.105882	0.433858	0.184784
17.2	0.104651	0.430524	0.182915
17.4	0.103448	0.427238	0.181083
17.6	0.102273	0.424	0.179287
17.8	0.101124	0.420808	0.177527
18	0.1	0.417662	0.1758
18.2	0.0989011	0.41456	0.174107
18.4	0.0978261	0.411502	0.172446
18.6	0.0967742	0.408487	0.170816
18.8	0.0957447	0.405514	0.169216
19	0.0947368	0.402582	0.167646
19.2	0.09375	0.399691	0.166105
19.4	0.0927835	0.396839	0.164591
19.6	0.0918367	0.394026	0.163105
19.8	0.0909091	0.391252	0.161646
20	0.09	0.388514	0.160212
20.2	0.0891089	0.385814	0.158803
20.4	0.0882353	0.383149	0.157419
20.6	0.0873786	0.38052	0.156059
20.8	0.0865385	0.377925	0.154722
21	0.0857143	0.375364	0.153407
21.2	0.0849057	0.372837	0.152115
21.4	0.0841121	0.370342	0.150844
21.6	0.0833333	0.367879	0.149594
21.8	0.0825688	0.365448	0.148365
22	0.0818182	0.363048	0.147155
22.2	0.0810811	0.360679	0.145965
22.4	0.0803571	0.358339	0.144794
22.6	0.079646	0.356028	0.143642
22.8	0.0789474	0.353747	0.142508
23	0.0782609	0.351493	0.141391
23.2	0.0775862	0.349268	0.140292
23.4	0.0769231	0.347069	0.13921
23.6	0.0762712	0.344898	0.138144
23.8	0.0756303	0.342752	0.137095
24	0.075	0.340633	0.136061
24.2	0.0743802	0.338539	0.135042
24.4	0.0737705	0.33647	0.134039
24.6	0.0731707	0.334425	0.133051
24.8	0.0725806	0.332405	0.132077
25	0.072	0.330408	0.131117
25.2	0.0714286	0.328435	0.130171
25.4	0.0708661	0.326485	0.129238
25.6	0.0703125	0.324557	0.128319
25.8	0.0697674	0.322651	0.127412
26	0.0692308	0.320767	0.126518
26.2	0.0687023	0.318904	0.125637
26.4	0.0681818	0.317063	0.124768
26.6	0.0676692	0.315242	0.123911
26.8	0.0671642	0.313442	0.123065
27	0.0666667	0.311661	0.122231
27.2	0.0661765	0.309901	0.121408
27.4	0.0656934	0.308159	0.120596
27.6	0.0652174	0.306437	0.119795
27.8	0.0647482	0.304734	0.119005
28	0.0642857	0.303049	0.118225
28.2	0.0638298	0.301382	0.117454
28.4	0.0633803	0.299734	0.116694
28.6	0.0629371	0.298102	0.115944
28.8	0.0625	0.296489	0.115203
29	0.062069	0.294892	0.114472
29.2	0.0616438	0.293312	0.11375
29.4	0.0612245	0.291749	0.113036
29.6	0.0608108	0.290202	0.112332
29.8	0.0604027	0.288671	0.111636
30	0.06	0.287156	0.110949
30.2	0.0596026	0.285656	0.110271
30.4	0.0592105	0.284172	0.1096
30.6	0.0588235	0.282703	0.108938
30.8	0.0584416	0.281249	0.108284
31	0.0580645	0.279809	0.107637
31.2	0.0576923	0.278384	0.106998
31.4	0.0573248	0.276973	0.106367
31.6	0.056962	0.275577	0.105743
31.8	0.0566038	0.274194	0.105126
32	0.05625	0.272824	0.104517
32.2	0.0559006	0.271468	0.103914
32.4	0.0555556	0.270126	0.103318
32.6	0.0552147	0.268796	0.102729
32.8	0.054878	0.267479	0.102147
33	0.0545455	0.266175	0.101572
33.2	0.0542169	0.264883	0.101002
33.4	0.0538922	0.263604	0.100439
33.6	0.0535714	0.262337	0.0998828
33.8	0.0532544	0.261082	0.0993323
34	0.0529412	0.259838	0.0987878
34.2	0.0526316	0.258607	0.0982492
34.4	0.0523256	0.257386	0.0977165
34.6	0.0520231	0.256177	0.0971895
34.8	0.0517241	0.25498	0.0966682
35	0.0514286	0.253793	0.0961524
35.2	0.0511364	0.252617	0.0956421
35.4	0.0508475	0.251452	0.0951371
35.6	0.0505618	0.250297	0.0946375
35.8	0.0502793	0.249153	0.0941431
36	0.05	0.248019	0.0936538
36.2	0.0497238	0.246896	0.0931695
36.4	0.0494505	0.245782	0.0926903
36.6	0.0491803	0.244678	0.0922159
36.8	0.048913	0.243584	0.0917464
37	0.0486486	0.2425	0.0912816
37.2	0.0483871	0.241425	0.0908215
37.4	0.0481283	0.24036	0.090366
37.6	0.0478723	0.239304	0.089915
37.8	0.047619	0.238257	0.0894685
38	0.0473684	0.237219	0.0890265
38.2	0.0471204	0.23619	0.0885887
38.4	0.046875	0.235169	0.0881553
38.6	0.0466321	0.234158	0.0877261
38.8	0.0463918	0.233155	0.087301
39	0.0461538	0.23216	0.08688
39.2	0.0459184	0.231174	0.0864631
39.4	0.0456853	0.230197	0.0860501
39.6	0.0454545	0.229227	0.085641
39.8	0.0452261	0.228265	0.0852359
40	0.045	0.227312	0.0848345
40.2	0.0447761	0.226366	0.0844369
40.4	0.0445545	0.225428	0.084043
40.6	0.044335	0.224497	0.0836528
40.8	0.0441176	0.223575	0.0832661
41	0.0439024	0.222659	0.082883
41.2	0.0436893	0.221752	0.0825035
41.4	0.0434783	0.220851	0.0821273
41.6	0.0432692	0.219958	0.0817546
41.8	0.0430622	0.219072	0.0813853
42	0.0428571	0.218192	0.0810192
42.2	0.042654	0.21732	0.0806565
42.4	0.0424528	0.216455	0.080297
42.6	0.0422535	0.215597	0.0799406
42.8	0.0420561	0.214745	0.0795874
43	0.0418605	0.2139	0.0792374
43.2	0.0416667	0.213061	0.0788903
43.4	0.0414747	0.212229	0.0785464
43.6	0.0412844	0.211404	0.0782053
43.8	0.0410959	0.210585	0.0778673
44	0.0409091	0.209772	0.0775321
44.2	0.040724	0.208965	0.0771998
44.4	0.0405405	0.208164	0.0768704
44.6	0.0403587	0.20737	0.0765437
44.8	0.0401786	0.206581	0.0762198
45	0.04	0.205799	0.0758987
45.2	0.039823	0.205022	0.0755802
45.4	0.0396476	0.204251	0.0752644
45.6	0.0394737	0.203486	0.0749512
45.8	0.0393013	0.202726	0.0746406
46	0.0391304	0.201973	0.0743326
46.2	0.038961	0.201224	0.0740271
46.4	0.0387931	0.200481	0.0737241
46.6	0.0386266	0.199744	0.0734236
46.8	0.0384615	0.199012	0.0731255
47	0.0382979	0.198285	0.0728298
47.2	0.0381356	0.197564	0.0725365
47.4	0.0379747	0.196847	0.0722455
47.6	0.0378151	0.196136	0.0719569
47.8	0.0376569	0.19543	0.0716706
48	0.0375	0.194729	0.0713865
48.2	0.0373444	0.194033	0.0711047
48.4	0.0371901	0.193342	0.0708251
48.6	0.037037	0.192656	0.0705477
48.8	0.0368852	0.191974	0.0702724
49	0.0367347	0.191298	0.0699993
49.2	0.0365854	0.190626	0.0697283
49.4	0.0364372	0.189959	0.0694594
49.6	0.0362903	0.189296	0.0691925
49.8	0.0361446	0.188638	0.0689277
50	0.036	0.187985	0.0686649
50.2	0.0358566	0.187336	0.0684041
50.4	0.0357143	0.186691	0.0681453
50.6	0.0355731	0.186051	0.0678884
50.8	0.0354331	0.185415	0.0676335
51	0.0352941	0.184784	0.0673804
51.2	0.0351562	0.184156	0.0671293
51.4	0.0350195	0.183533	0.06688
51.6	0.0348837	0.182915	0.0666326
51.8	0.034749	0.1823	0.0663869
52	0.0346154	0.181689	0.0661431
52.2	0.0344828	0.181083	0.0659011
52.4	0.0343511	0.18048	0.0656608
52.6	0.0342205	0.179882	0.0654223
52.8	0.0340909	0.179287	0.0651855
53	0.0339623	0.178696	0.0649504
53.2	0.0338346	0.17811	0.064717
53.4	0.0337079	0.177527	0.0644852
53.6	0.0335821	0.176947	0.0642552
53.8	0.0334572	0.176372	0.0640267
54	0.0333333	0.1758	0.0637999
54.2	0.0332103	0.175232	0.0635747
54.4	0.0330882	0.174668	0.063351
54.6	0.032967	0.174107	0.0631289
54.8	0.0328467	0.173549	0.0629084
55	0.0327273	0.172996	0.0626894
55.2	0.0326087	0.172446	0.062472
55.4	0.032491	0.171899	0.062256
55.6	0.0323741	0.171355	0.0620415
55.8	0.0322581	0.170816	0.0618285
56	0.0321429	0.170279	0.0616169
56.2	0.0320285	0.169746	0.0614068
56.4	0.0319149	0.169216	0.0611981
56.6	0.0318021	0.168689	0.0609909
56.8	0.0316901	0.168166	0.060785
57	0.0315789	0.167646	0.0605805
57.2	0.0314685	0.167129	0.0603774
57.4	0.0313589	0.166615	0.0601756
57.6	0.03125	0.166105	0.0599752
57.8	0.0311419	0.165597	0.0597761
58	0.0310345	0.165093	0.0595784
58.2	0.0309278	0.164591	0.0593819
58.4	0.0308219	0.164093	0.0591867
58.6	0.0307167	0.163598	0.0589928
58.8	0.0306122	0.163105	0.0588002
59	0.0305085	0.162616	0.0586088
59.2	0.0304054	0.162129	0.0584187
59.4	0.030303	0.161646	0.0582298
59.6	0.0302013	0.161165	0.0580421
59.8	0.0301003	0.160687	0.0578556
60	0.03	0.160212	0.0576703
60.2	0.0299003	0.15974	0.0574862
60.4	0.0298013	0.15927	0.0573033
60.6	0.029703	0.158803	0.0571215
60.8	0.0296053	0.158339	0.0569409
61	0.0295082	0.157878	0.0567614
61.2	0.0294118	0.157419	0.056583
61.4	0.029316	0.156963	0.0564058
61.6	0.0292208	0.15651	0.0562296
61.8	0.0291262	0.156059	0.0560546
62	0.0290323	0.155611	0.0558806
62.2	0.0289389	0.155165	0.0557077
62.4	0.0288462	0.154722	0.0555359
62.6	0.028754	0.154281	0.0553652
62.8	0.0286624	0.153843	0.0551955
63	0.0285714	0.153407	0.0550268
63.2	0.028481	0.152974	0.0548591
63.4	0.0283912	0.152543	0.0546925
63.6	0.0283019	0.152115	0.0545269
63.8	0.0282132	0.151689	0.0543623
64	0.028125	0.151265	0.0541986
64.2	0.0280374	0.150844	0.054036
64.4	0.0279503	0.150425	0.0538743
64.6	0.0278638	0.150008	0.0537136
64.8	0.0277778	0.149594	0.0535539
65	0.0276923	0.149182	0.053395
65.2	0.0276074	0.148772	0.0532372
65.4	0.0275229	0.148365	0.0530802
65.6	0.027439	0.147959	0.0529242
65.8	0.0273556	0.147556	0.0527691
66	0.0272727	0.147155	0.0526149
66.2	0.0271903	0.146756	0.0524616
66.4	0.0271084	0.14636	0.0523092
66.6	0.027027	0.145965	0.0521577
66.8	0.0269461	0.145573	0.052007
67	0.0268657	0.145182	0.0518573
67.2	0.0267857	0.144794	0.0517083
67.4	0.0267062	0.144408	0.0515603
67.6	0.0266272	0.144024	0.051413
67.8	0.0265487	0.143642	0.0512667
68	0.0264706	0.143262	0.0511211
68.2	0.026393	0.142884	0.0509764
68.4	0.0263158	0.142508	0.0508324
68.6	0.0262391	0.142134	0.0506893
68.8	0.0261628	0.141761	0.050547
69	0.026087	0.141391	0.0504055
69.2	0.0260116	0.141023	0.0502648
69.4	0.0259366	0.140657	0.0501249
69.6	0.0258621	0.140292	0.0499857
69.8	0.025788	0.139929	0.0498474
70	0.0257143	0.139569	0.0497097
70.2	0.025641	0.13921	0.0495729
70.4	0.0255682	0.138853	0.0494368
70.6	0.0254958	0.138498	0.0493014
70.8	0.0254237	0.138144	0.0491668
71	0.0253521	0.137792	0.0490329
71.2	0.0252809	0.137443	0.0488997
71.4	0.0252101	0.137095	0.0487673
71.6	0.0251397	0.136748	0.0486355
71.8	0.0250696	0.136404	0.0485045
72	0.025	0.136061	0.0483742
72.2	0.0249307	0.13572	0.0482446
72.4	0.0248619	0.13538	0.0481156
72.6	0.0247934	0.135042	0.0479874
72.8	0.0247253	0.134706	0.0478598
73	0.0246575	0.134372	0.047733
73.2	0.0245902	0.134039	0.0476067
73.4	0.0245232	0.133708	0.0474812
73.6	0.0244565	0.133379	0.0473563
73.8	0.0243902	0.133051	0.0472321
74	0.0243243	0.132724	0.0471085
74.2	0.0242588	0.1324	0.0469856
74.4	0.0241935	0.132077	0.0468633
74.6	0.0241287	0.131755	0.0467416
74.8	0.0240642	0.131435	0.0466206
75	0.024	0.131117	0.0465002
75.2	0.0239362	0.1308	0.0463804
75.4	0.0238727	0.130484	0.0462612
75.6	0.0238095	0.130171	0.0461427
75.8	0.0237467	0.129858	0.0460247
76	0.0236842	0.129547	0.0459073
76.2	0.023622	0.129238	0.0457906
76.4	0.0235602	0.12893	0.0456744
76.6	0.0234987	0.128624	0.0455588
76.8	0.0234375	0.128319	0.0454439
77	0.0233766	0.128015	0.0453294
77.2	0.0233161	0.127713	0.0452156
77.4	0.0232558	0.127412	0.0451023
77.6	0.0231959	0.127113	0.0449896
77.8	0.0231362	0.126815	0.0448775
78	0.0230769	0.126518	0.0447659
78.2	0.0230179	0.126223	0.0446549
78.4	0.0229592	0.12593	0.0445444
78.6	0.0229008	0.125637	0.0444345
78.8	0.0228426	0.125346	0.0443251
79	0.0227848	0.125056	0.0442162
79.2	0.0227273	0.124768	0.0441079
79.4	0.02267	0.124481	0.0440001
79.6	0.0226131	0.124195	0.0438928
79.8	0.0225564	0.123911	0.0437861
80	0.0225	0.123628	0.0436798
80.2	0.0224439	0.123346	0.0435741
80.4	0.0223881	0.123065	0.0434689
80.6	0.0223325	0.122786	0.0433642
80.8	0.0222772	0.122508	0.04326
81	0.0222222	0.122231	0.0431563
81.2	0.0221675	0.121956	0.0430531
81.4	0.022113	0.121681	0.0429504
81.6	0.0220588	0.121408	0.0428482
81.8	0.0220049	0.121137	0.0427465
82	0.0219512	0.120866	0.0426452
82.2	0.0218978	0.120596	0.0425444
82.4	0.0218447	0.120328	0.0424441
82.6	0.0217918	0.120061	0.0423443
82.8	0.0217391	0.119795	0.0422449
83	0.0216867	0.119531	0.0421461
83.2	0.0216346	0.119267	0.0420476
83.4	0.0215827	0.119005	0.0419496
83.6	0.0215311	0.118744	0.0418521
83.8	0.0214797	0.118483	0.0417551
84	0.0214286	0.118225	0.0416584
84.2	0.0213777	0.117967	0.0415623
84.4	0.021327	0.11771	0.0414666
84.6	0.0212766	0.117454	0.0413713
84.8	0.0212264	0.1172	0.0412764
85	0.0211765	0.116947	0.041182
85.2	0.0211268	0.116694	0.041088
85.4	0.0210773	0.116443	0.0409944
85.6	0.021028	0.116193	0.0409013
85.8	0.020979	0.115944	0.0408086
86	0.0209302	0.115696	0.0407163
86.2	0.0208817	0.115449	0.0406244
86.4	0.0208333	0.115203	0.040533
86.6	0.0207852	0.114958	0.0404419
86.8	0.0207373	0.114714	0.0403513
87	0.0206897	0.114472	0.040261
87.2	0.0206422	0.11423	0.0401712
87.4	0.020595	0.113989	0.0400818
87.6	0.0205479	0.11375	0.0399927
87.8	0.0205011	0.113511	0.0399041
88	0.0204545	0.113273	0.0398158
88.2	0.0204082	0.113036	0.039728
88.4	0.020362	0.112801	0.0396405
88.6	0.020316	0.112566	0.0395534
88.8	0.0202703	0.112332	0.0394667
89	0.0202247	0.112099	0.0393804
89.2	0.0201794	0.111867	0.0392944
89.4	0.0201342	0.111636	0.0392088
89.6	0.0200893	0.111407	0.0391236
89.8	0.0200445	0.111177	0.0390388
90	0.02	0.110949	0.0389543
90.2	0.0199557	0.110722	0.0388702
90.4	0.0199115	0.110496	0.0387865
90.6	0.0198675	0.110271	0.0387031
90.8	0.0198238	0.110046	0.0386201
91	0.0197802	0.109823	0.0385374
91.2	0.0197368	0.1096	0.0384551
91.4	0.0196937	0.109379	0.0383731
91.6	0.0196507	0.109158	0.0382915
91.8	0.0196078	0.108938	0.0382102
92	0.0195652	0.108719	0.0381293
92.2	0.0195228	0.108501	0.0380487
92.4	0.0194805	0.108284	0.0379685
92.6	0.0194384	0.108067	0.0378886
92.8	0.0193966	0.107852	0.037809
93	0.0193548	0.107637	0.0377298
93.2	0.0193133	0.107423	0.0376509
93.4	0.0192719	0.10721	0.0375723
93.6	0.0192308	0.106998	0.037494
93.8	0.0191898	0.106787	0.0374161
94	0.0191489	0.106576	0.0373385
94.2	0.0191083	0.106367	0.0372612
94.4	0.0190678	0.106158	0.0371843
94.6	0.0190275	0.10595	0.0371076
94.8	0.0189873	0.105743	0.0370313
95	0.0189474	0.105536	0.0369553
95.2	0.0189076	0.105331	0.0368796
95.4	0.0188679	0.105126	0.0368042
95.6	0.0188285	0.104922	0.0367291
95.8	0.0187891	0.104719	0.0366543
96	0.01875	0.104517	0.0365798
96.2	0.018711	0.104315	0.0365056
96.4	0.0186722	0.104114	0.0364318
96.6	0.0186335	0.103914	0.0363582
96.8	0.018595	0.103715	0.0362849
97	0.0185567	0.103516	0.0362119
97.2	0.0185185	0.103318	0.0361392
97.4	0.0184805	0.103121	0.0360668
97.6	0.0184426	0.102925	0.0359947
97.8	0.0184049	0.102729	0.0359229
98	0.0183673	0.102535	0.0358514
98.2	0.0183299	0.102341	0.0357801
98.4	0.0182927	0.102147	0.0357091
98.6	0.0182556	0.101955	0.0356384
98.8	0.0182186	0.101763	0.035568
99	0.0181818	0.101572	0.0354979
99.2	0.0181452	0.101381	0.035428
99.4	0.0181087	0.101191	0.0353585
99.6	0.0180723	0.101002	0.0352891
99.8	0.0180361	0.100814	0.0352201
100	0.018	0.100626	0.0351513
100.2	0.0179641	0.100439	0.0350828
100.4	0.0179283	0.100253	0.0350146
100.6	0.0178926	0.100068	0.0349466
100.8	0.0178571	0.0998828	0.0348789
101	0.0178218	0.0996986	0.0348115
101.2	0.0177866	0.0995151	0.0347443
101.4	0.0177515	0.0993323	0.0346774
101.6	0.0177165	0.0991501	0.0346107
101.8	0.0176817	0.0989686	0.0345443
102	0.0176471	0.0987878	0.0344781
102.2	0.0176125	0.0986076	0.0344122
102.4	0.0175781	0.0984281	0.0343466
102.6	0.0175439	0.0982492	0.0342812
102.8	0.0175097	0.098071	0.034216
103	0.0174757	0.0978934	0.0341511
103.2	0.0174419	0.0977165	0.0340864
103.4	0.0174081	0.0975402	0.034022
103.6	0.0173745	0.0973645	0.0339578
103.8	0.017341	0.0971895	0.0338939
104	0.0173077	0.0970151	0.0338302
104.2	0.0172745	0.0968413	0.0337667
104.4	0.0172414	0.0966682	0.0337035
104.6	0.0172084	0.0964956	0.0336406
104.8	0.0171756	0.0963237	0.0335778
105	0.0171429	0.0961524	0.0335153
105.2	0.0171103	0.0959817	0.033453
105.4	0.0170778	0.0958116	0.033391
105.6	0.0170455	0.0956421	0.0333291
105.8	0.0170132	0.0954732	0.0332676
106	0.0169811	0.0953048	0.0332062
106.2	0.0169492	0.0951371	0.0331451
106.4	0.0169173	0.09497	0.0330841
106.6	0.0168856	0.0948034	0.0330234
106.8	0.0168539	0.0946375	0.032963
107	0.0168224	0.0944721	0.0329027
107.2	0.016791	0.0943073	0.0328427
107.4	0.0167598	0.0941431	0.0327829
107.6	0.0167286	0.0939794	0.0327233
107.8	0.0166976	0.0938163	0.0326639
108	0.0166667	0.0936538	0.0326048
108.2	0.0166359	0.0934918	0.0325458
108.4	0.0166052	0.0933304	0.0324871
108.6	0.0165746	0.0931695	0.0324286
108.8	0.0165441	0.0930092	0.0323703
109	0.0165138	0.0928495	0.0323122
109.2	0.0164835	0.0926903	0.0322543
109.4	0.0164534	0.0925316	0.0321966
109.6	0.0164234	0.0923735	0.0321391
109.8	0.0163934	0.0922159	0.0320818
110	0.0163636	0.0920589	0.0320248
110.2	0.0163339	0.0919023	0.0319679
