# Supplementary material for: Quantifying crowding-ventilation effect on respiratory infections
Source: Research Square preprint supplement (doi:10.21203/rs.3.rs-7664648/v1), 2025-10-09
Supplement: Supplementary file 20 [file Figure 3a.xlsx]

## Sheet: Spaciousness ventilation Fig3ab
						Table 1. Spaciousness versus clean air equivalent in combining VTAC and clean air equivalent to archieve a certain intake fraction time threshold of 0.01 hours under five typical exposure periods of 0.5, 1, 2, 5 and 8 hours.
						Intake fraction time (hr):	0.01		0.01			0.01			0.01			0.01
						inhalation flow rate (L/s)	0.1		0.1			0.1			0.1			0.1
						Exposure time (hr)	0.5		1			2			5			8
						Effective clean flow rate (L/s.p)	5		10			20			50			80
						Clean air equivalent qc (L/s)	2Vp/delta t	Vp (m3)	Clean air equivalent qc (L/s)	2Vp/delta t	Vp (m3)	Clean air equivalent qc (L/s)	2Vp/delta t	Vp (m3)	Clean air equivalent qc (L/s)	2Vp/delta t	Vp (m3)	Clean air equivalent qc (L/s)	2Vp/delta t	Vp (m3)
						0.1	4.96989	4.4729	0.1	9.97469	17.9544	0.1	19.9787	71.9234	0.1	49.9831	449.848	0.1	79.985	1151.78
						0.2	4.92832	4.43549	0.2	9.93978	17.8916	0.3	19.916	71.6975	0.6	49.8411	448.57	1.1	79.6985	1147.66
						0.3	4.88086	4.39278	0.3	9.89999	17.82	0.5	19.8408	71.4268	1.1	49.6608	446.947	2.1	79.3231	1142.25
						0.4	4.82908	4.34617	0.4	9.85663	17.7419	0.7	19.7574	71.1267	1.6	49.4579	445.121	3.1	78.8978	1136.13
						0.5	4.77377	4.29639	0.5	9.8104	17.6587	0.9	19.6677	70.8037	2.1	49.238	443.142	4.1	78.4355	1129.47
						0.6	4.71543	4.24389	0.6	9.76172	17.5711	1.1	19.5727	70.4617	2.6	49.0042	441.038	5.1	77.9432	1122.38
						0.7	4.65441	4.18897	0.7	9.7109	17.4796	1.3	19.4731	70.1033	3.1	48.7586	438.827	6.1	77.4252	1114.92
						0.8	4.59096	4.13186	0.8	9.65816	17.3847	1.5	19.3695	69.7303	3.6	48.5025	436.522	7.1	76.8845	1107.14
						0.9	4.52525	4.07272	0.9	9.60366	17.2866	1.7	19.2622	69.344	4.1	48.237	434.133	8.1	76.3233	1099.06
						1	4.45744	4.01169	1	9.54754	17.1856	1.9	19.1516	68.9457	4.6	47.9628	431.665	9.1	75.7435	1090.71
						1.1	4.38764	3.94888	1.1	9.48991	17.0818	2.1	19.0378	68.5361	5.1	47.6807	429.126	10.1	75.1463	1082.11
						1.2	4.31595	3.88435	1.2	9.43087	16.9756	2.3	18.9211	68.116	5.6	47.3911	426.52	11.1	74.5328	1073.27
						1.3	4.24243	3.81819	1.3	9.37049	16.8669	2.5	18.8017	67.686	6.1	47.0945	423.85	12.1	73.9041	1064.22
						1.4	4.16716	3.75044	1.4	9.30883	16.7559	2.7	18.6796	67.2466	6.6	46.7913	421.121	13.1	73.2609	1054.96
						1.5	4.09018	3.68116	1.5	9.24595	16.6427	2.9	18.5551	66.7983	7.1	46.4817	418.336	14.1	72.6037	1045.49
						1.6	4.01153	3.61038	1.6	9.18191	16.5274	3.1	18.4282	66.3414	7.6	46.1662	415.496	15.1	71.9333	1035.84
						1.7	3.93125	3.53813	1.7	9.11675	16.4101	3.3	18.2989	65.8762	8.1	45.8448	412.604	16.1	71.2501	1026
						1.8	3.84936	3.46442	1.8	9.0505	16.2909	3.5	18.1675	65.4031	8.6	45.5179	409.661	17.1	70.5546	1015.99
						1.9	3.76587	3.38928	1.9	8.9832	16.1698	3.7	18.034	64.9222	9.1	45.1856	406.671	18.1	69.847	1005.8
						2	3.6808	3.31272	2	8.91488	16.0468	3.9	17.8983	64.434	9.6	44.8481	403.633	19.1	69.1277	995.439
						2.1	3.59416	3.23474	2.1	8.84556	15.922	4.1	17.7607	63.9385	10.1	44.5055	400.549	20.1	68.397	984.917
						2.2	3.50594	3.15535	2.2	8.77528	15.7955	4.3	17.6211	63.4359	10.6	44.1579	397.421	21.1	67.6552	974.235
						2.3	3.41615	3.07454	2.3	8.70405	15.6673	4.5	17.4796	62.9264	11.1	43.8055	394.25	22.1	66.9025	963.396
						2.4	3.32477	2.9923	2.4	8.63189	15.5374	4.7	17.3362	62.4102	11.6	43.4485	391.036	23.1	66.139	952.402
						2.5	3.2318	2.90862	2.5	8.55882	15.4059	4.9	17.1909	61.8874	12.1	43.0868	387.781	24.1	65.365	941.256
						2.6	3.1372	2.82348	2.6	8.48486	15.2728	5.1	17.0439	61.3581	12.6	42.7205	384.485	25.1	64.5806	929.961
						2.7	3.04096	2.73686	2.7	8.41003	15.138	5.3	16.8951	60.8224	13.1	42.3498	381.149	26.1	63.7859	918.517
						2.8	2.94305	2.64874	2.8	8.33432	15.0018	5.5	16.7446	60.2804	13.6	41.9748	377.773	27.1	62.9811	906.927
						2.9	2.84342	2.55908	2.9	8.25776	14.864	5.7	16.5923	59.7323	14.1	41.5954	374.359	28.1	62.1661	895.192
						3	2.74204	2.46784	3	8.18036	14.7247	5.9	16.4383	59.178	14.6	41.2118	370.906	29.1	61.3412	883.313
						3.1	2.63886	2.37497	3.1	8.10213	14.5838	6.1	16.2827	58.6177	15.1	40.8239	367.415	30.1	60.5063	871.291
						3.2	2.5338	2.28042	3.2	8.02307	14.4415	6.3	16.1254	58.0514	15.6	40.4319	363.887	31.1	59.6615	859.126
						3.3	2.42681	2.18413	3.3	7.94319	14.2977	6.5	15.9665	57.4793	16.1	40.0358	360.322	32.1	58.8069	846.82
						3.4	2.3178	2.08602	3.4	7.8625	14.1525	6.7	15.8059	56.9012	16.6	39.6356	356.72	33.1	57.9424	834.371
						3.5	2.20667	1.98601	3.5	7.78101	14.0058	6.9	15.6437	56.3174	17.1	39.2313	353.082	34.1	57.0682	821.781
						3.6	2.09331	1.88398	3.6	7.69871	13.8577	7.1	15.4799	55.7277	17.6	38.8231	349.408	35.1	56.184	809.05
						3.7	1.97759	1.77983	3.7	7.61562	13.7081	7.3	15.3145	55.1323	18.1	38.4108	345.697	36.1	55.2901	796.177
						3.8	1.85935	1.67341	3.8	7.53174	13.5571	7.5	15.1476	54.5312	18.6	37.9945	341.951	37.1	54.3862	783.161
						3.9	1.73839	1.56455	3.9	7.44706	13.4047	7.7	14.979	53.9244	19.1	37.5743	338.169	38.1	53.4724	770.003
						4	1.61449	1.45304	4	7.3616	13.2509	7.9	14.8089	53.3119	19.6	37.1502	334.352	39.9	51.8025	745.955
						4.1	1.48737	1.33863	4.1	7.27535	13.0956	8.1	14.6372	52.6937	20.1	36.7221	330.499	40.9	50.8606	732.392
						4.2	1.35665	1.22099	4.2	7.18832	12.939	8.3	14.4639	52.0699	20.6	36.29	326.61	41.9	49.9085	718.682
						4.3	1.2219	1.09971	4.3	7.10049	12.7809	8.5	14.289	51.4404	21.1	35.8541	322.687	42.9	48.9461	704.824
						4.4	1.08249	0.974242	4.4	7.01189	12.6214	8.7	14.1126	50.8053	21.6	35.4142	318.728	43.9	47.9733	690.815
						4.5	0.937589	0.84383	4.5	6.92249	12.4605	8.9	13.9346	50.1645	22.1	34.9703	314.733	44.9	46.9899	676.655
						4.6	0.785969	0.707372	4.6	6.8323	12.2981	9.1	13.755	49.5179	22.6	34.5226	310.703	45.9	45.9959	662.34
						4.7	0.625695	0.563126	4.7	6.74132	12.1344	9.3	13.5738	48.8657	23.1	34.0708	306.638	46.9	44.9909	647.869
						4.8	0.453301	0.407971	4.8	6.64954	11.9692	9.5	13.3911	48.2078	23.6	33.6151	302.536	47.9	43.9749	633.239
						4.9	0.260884	0.234796	4.9	6.55697	11.8025	9.7	13.2067	47.5442	24.1	33.1555	298.399	48.9	42.9476	618.446
						5	2.75707e-12	2.48137e-12	5	6.46359	11.6345	9.9	13.0208	46.8747	24.6	32.6918	294.226	49.9	41.9089	603.488
									5.1	6.3694	11.4649	10.1	12.8332	46.1995	24.9	32.4117	291.705	50.9	40.8583	588.36
									5.2	6.2744	11.2939	10.3	12.644	45.5184	25.9	31.4673	283.206	51.9	39.7958	573.06
									5.3	6.17857	11.1214	10.5	12.4532	44.8314	26.9	30.5066	274.559	52.9	38.721	557.582
									5.4	6.08192	10.9475	10.7	12.2607	44.1385	27.9	29.5291	265.762	53.9	37.6334	541.922
									5.5	5.98443	10.772	10.9	12.0666	43.4396	28.9	28.5346	256.812	54.9	36.5329	526.074
									5.6	5.88609	10.595	11.1	11.8707	42.7346	29.9	27.5226	247.704	55.9	35.4189	510.032
									5.7	5.7869	10.4164	11.3	11.6732	42.0236	30.9	26.4926	238.433	56.9	34.2911	493.791
									5.8	5.68684	10.2363	11.5	11.474	41.3063	31.9	25.444	228.996	57.9	33.1488	477.343
									5.9	5.58591	10.0546	11.7	11.273	40.5827	32.9	24.376	219.384	58.9	31.9916	460.679
									6	5.48409	9.87135	11.9	11.0702	39.8528	33.9	23.288	209.592	59.9	30.8189	443.792
									6.1	5.38136	9.68645	12.1	10.8657	39.1164	34.9	22.1788	199.61	60.9	29.6299	426.671
									6.2	5.27771	9.49989	12.3	10.6593	38.3735	35.9	21.0475	189.428	61.9	28.4239	409.304
									6.3	5.17314	9.31165	12.5	10.4511	37.6239	36.9	19.8927	179.035	62.9	27.2	391.68
									6.4	5.06761	9.12169	12.7	10.241	36.8675	37.9	18.7129	168.416	63.9	25.9572	373.784
									6.5	4.96111	8.93	12.9	10.029	36.1043	38.9	17.5062	157.555	64.9	24.6944	355.6
									6.6	4.85363	8.73653	13.1	9.81499	35.334	39.9	16.2702	146.432	65.9	23.4103	337.108
									6.7	4.74513	8.54124	13.3	9.59901	34.5564	40.9	15.0023	135.021	66.9	22.1033	318.287
									6.8	4.6356	8.34408	13.5	9.38099	33.7716	41.9	13.699	123.291	67.9	20.7717	299.112
									6.9	4.52502	8.14503	13.7	9.16089	32.9792	42.9	12.3557	111.202	68.9	19.4133	279.551
									7	4.41335	7.94402	13.9	8.93864	32.1791	43.9	10.9666	98.6997	69.9	18.0256	259.569
									7.1	4.30056	7.74101	14.1	8.71419	31.3711	44.9	9.52358	85.7122	70.9	16.6056	239.12
									7.2	4.18663	7.53593	14.3	8.48748	30.5549	45.9	8.01481	72.1332	71.9	15.1492	218.149
									7.3	4.07152	7.32873	14.5	8.25844	29.7304	46.9	6.42192	57.7973	72.9	13.6517	196.584
									7.4	3.95518	7.11933	14.7	8.02701	28.8972	47.9	4.71247	42.4123	73.9	12.1064	174.333
									7.5	3.83759	6.90767	14.9	7.7931	28.0552	48.9	2.81497	25.3347	74.9	10.5045	151.265
									7.6	3.7187	6.69365	15.1	7.55662	27.2038	49.9	0.414224	3.72801	75.9	8.83305	127.196
									7.7	3.59844	6.4772	15.3	7.31749	26.3429	49.99	0.0656619	0.590957	76.9	7.07183	101.834
									7.8	3.47678	6.25821	15.5	7.07559	25.4721	49.999	0.0104069	0.093662	77.9	5.18528	74.668
									7.9	3.35365	6.03657	15.7	6.83081	24.5909				78.9	3.095	44.568
									8	3.22899	5.81217	15.9	6.58303	23.6989				79.9999	0.00181195	0.0260921
									8.1	3.10271	5.58487	16.1	6.3321	22.7956
									8.2	2.97473	5.35452	16.3	6.07787	21.8803
									8.3	2.84497	5.12094	16.5	5.82016	20.9526
									8.4	2.71331	4.88396	16.7	5.55877	20.0116
									8.5	2.57963	4.64334	16.9	5.29346	19.0565
									8.6	2.4438	4.39884	17.1	5.02399	18.0864
									8.7	2.30565	4.15016	17.3	4.75005	17.1002
									8.8	2.16498	3.89697	17.5	4.47128	16.0966
									8.9	2.02158	3.63885	17.7	4.18728	15.0742
									9	1.87518	3.37532	17.9	3.89755	14.0312
									9.1	1.72543	3.10578	18.1	3.6015	12.9654
									9.2	1.57194	2.82949	18.3	3.29837	11.8741
									9.3	1.41416	2.54548	18.5	2.98724	10.7541
									9.4	1.25139	2.2525	18.7	2.6669	9.60084
									9.5	1.08267	1.94881	18.9	2.3357	8.40853
									9.6	0.906602	1.63188	19.1	1.99134	7.16883
									9.7	0.720958	1.29772	19.3	1.63033	5.86919
									9.8	0.521769	0.939183	19.5	1.24685	4.48868
									9.9	0.29998	0.539964	19.7	0.829424	2.98593
									9.9999	0.00119544	0.00215179	19.999	0.00866427	0.0311914
