# Supplementary material for: Quantifying crowding-ventilation effect on respiratory infections
Source: Research Square preprint supplement (doi:10.21203/rs.3.rs-7664648/v1), 2025-10-09
Supplement: Supplementary file 24 [file Figure 3c.xlsx]

## Sheet: Spaciousness ventilation Fig3c
						Table 1. Spaciousness versus clean air equivalent in combining VTAC and clean air equivalent to archieve a certain intake fraction time threshold of 0.02 hours under five typical exposure periods of 0.5, 1, 2, 5 and 8 hours.
						Intake fraction time (hr):	0.02		0.02			0.02			0.02			0.02
						inhalation flow rate (L/s)	0.1		0.1			0.1			0.1			0.1
						Exposure time (hr)	0.5		1			2			5			8
						Effective clean flow rate (L/s.p)	2.5		5			10			25			40
						Clean air equivalent qc (L/s)	2Vp/delta t	Vp (m3)	Clean air equivalent qc (L/s)	2Vp/delta t	Vp (m3)	Clean air equivalent qc (L/s)	2Vp/delta t	Vp (m3)	Clean air equivalent qc (L/s)	2Vp/delta t	Vp (m3)	Clean air equivalent qc (L/s)	2Vp/delta t	Vp (m3)
						0.1	2.46416	2.21774	0.1	4.96989	8.94581	0.1	9.97469	35.9089	0.1	24.9799	224.819	0.1	39.9821	575.742
						0.15	2.44043	2.19639	0.15	4.95	8.90999	0.2	9.93978	35.7832	0.35	24.9036	224.133	0.6	39.8319	573.58
						0.2	2.41454	2.17309	0.2	4.92832	8.87097	0.3	9.89999	35.64	0.6	24.8109	223.298	1.1	39.6412	570.834
						0.25	2.38688	2.1482	0.25	4.9052	8.82936	0.4	9.85663	35.4839	0.85	24.7076	222.368	1.6	39.4265	567.742
						0.3	2.35772	2.12195	0.3	4.88086	8.78555	0.5	9.8104	35.3174	1.1	24.5961	221.365	2.1	39.1938	564.391
						0.35	2.32721	2.09449	0.35	4.85545	8.73981	0.6	9.76172	35.1422	1.35	24.478	220.302	2.6	38.9463	560.826
						0.4	2.29548	2.06593	0.4	4.82908	8.69234	0.7	9.7109	34.9592	1.6	24.3541	219.187	3.1	38.686	557.079
						0.45	2.26262	2.03636	0.45	4.80183	8.64329	0.8	9.65816	34.7694	1.85	24.2251	218.026	3.6	38.4146	553.171
						0.5	2.22872	2.00585	0.5	4.77377	8.59278	0.9	9.60366	34.5732	2.1	24.0914	216.823	4.1	38.1331	549.116
						0.55	2.19382	1.97444	0.55	4.74496	8.54092	1	9.54754	34.3711	2.35	23.9535	215.581	4.6	37.8422	544.928
						0.6	2.15797	1.94218	0.6	4.71543	8.48778	1.1	9.48991	34.1637	2.6	23.8117	214.305	5.1	37.5428	540.616
						0.65	2.12122	1.90909	0.65	4.68524	8.43344	1.2	9.43087	33.9511	2.85	23.6661	212.995	5.6	37.2353	536.189
						0.7	2.08358	1.87522	0.7	4.65441	8.37795	1.3	9.37049	33.7337	3.1	23.5172	211.655	6.1	36.9202	531.651
						0.75	2.04509	1.84058	0.75	4.62298	8.32136	1.4	9.30883	33.5118	3.35	23.3649	210.284	6.6	36.5979	527.009
						0.8	2.00577	1.80519	0.8	4.59096	8.26372	1.5	9.24595	33.2854	3.6	23.2096	208.886	7.1	36.2686	522.269
						0.85	1.96563	1.76906	0.85	4.55837	8.20507	1.6	9.18191	33.0549	3.85	23.0512	207.461	7.6	35.9328	517.432
						0.9	1.92468	1.73221	0.9	4.52525	8.14545	1.7	9.11675	32.8203	4.1	22.89	206.01	8.1	35.5906	512.504
						0.95	1.88293	1.69464	0.95	4.4916	8.08488	1.8	9.0505	32.5818	4.35	22.7259	204.533	8.6	35.2422	507.487
						1	1.8404	1.65636	1	4.45744	8.02339	1.9	8.9832	32.3395	4.6	22.5593	203.033	9.1	34.8878	502.384
						1.05	1.79708	1.61737	1.05	4.42278	7.96101	2	8.91488	32.0936	4.85	22.39	201.51	9.6	34.5276	497.197
						1.1	1.75297	1.57767	1.1	4.38764	7.89775	2.1	8.84556	31.844	5.1	22.2182	199.964	10.1	34.1617	491.928
						1.15	1.70808	1.53727	1.15	4.35202	7.83364	2.2	8.77528	31.591	5.35	22.0439	198.395	10.6	33.7902	486.579
						1.2	1.66239	1.49615	1.2	4.31595	7.7687	2.3	8.70405	31.3346	5.6	21.8672	196.805	11.1	33.4133	481.152
						1.25	1.6159	1.45431	1.25	4.27941	7.70294	2.4	8.63189	31.0748	5.85	21.6882	195.194	11.6	33.0311	475.647
						1.3	1.5686	1.41174	1.3	4.24243	7.63638	2.5	8.55882	30.8118	6.1	21.5069	193.562	12.1	32.6435	470.067
						1.35	1.52048	1.36843	1.35	4.20501	7.56902	2.6	8.48486	30.5455	6.35	21.3234	191.91	12.6	32.2508	464.412
						1.4	1.47152	1.32437	1.4	4.16716	7.50089	2.7	8.41003	30.2761	6.6	21.1376	190.238	13.1	31.8529	458.682
						1.45	1.42171	1.27954	1.45	4.12888	7.43199	2.8	8.33432	30.0036	6.85	20.9496	188.547	13.6	31.45	452.88
						1.5	1.37102	1.23392	1.5	4.09018	7.36233	2.9	8.25776	29.728	7.1	20.7595	186.836	14.1	31.042	447.005
						1.55	1.31943	1.18749	1.55	4.05106	7.29192	3	8.18036	29.4493	7.35	20.5673	185.105	14.6	30.6291	441.059
						1.6	1.2669	1.14021	1.6	4.01153	7.22076	3.1	8.10213	29.1677	7.6	20.3729	183.356	15.1	30.2111	435.04
						1.65	1.21341	1.09207	1.65	3.9716	7.14887	3.2	8.02307	28.883	7.85	20.1765	181.589	15.6	29.7883	428.951
						1.7	1.1589	1.04301	1.7	3.93125	7.07625	3.3	7.94319	28.5955	8.1	19.978	179.802	16.1	29.3605	422.791
						1.75	1.10334	0.993003	1.75	3.8905	7.00291	3.4	7.8625	28.305	8.35	19.7775	177.998	16.6	28.9277	416.559
						1.8	1.04666	0.941991	1.8	3.84936	6.92884	3.5	7.78101	28.0116	8.6	19.575	176.175	17.1	28.4901	410.257
						1.85	0.988796	0.889916	1.85	3.80781	6.85406	3.6	7.69871	27.7154	8.85	19.3705	174.334	17.6	28.0475	403.885
						1.9	0.929674	0.836707	1.9	3.76587	6.77856	3.7	7.61562	27.4162	9.1	19.1639	172.475	18.1	27.6001	397.441
						1.95	0.869196	0.782276	1.95	3.72353	6.70236	3.8	7.53174	27.1143	9.35	18.9554	170.599	18.6	27.1476	390.926
						2	0.807246	0.726522	2	3.6808	6.62544	3.9	7.44706	26.8094	9.6	18.7449	168.704	19.1	26.6903	384.34
						2.05	0.743683	0.669315	2.05	3.63768	6.54782	4	7.3616	26.5018	9.85	18.5324	166.792	19.6	26.2279	377.681
						2.1	0.678327	0.610495	2.1	3.59416	6.46948	4.1	7.27535	26.1913	10.1	18.318	164.862	20.1	25.7605	370.951
						2.15	0.61095	0.549855	2.15	3.55025	6.39044	4.2	7.18832	25.8779	10.35	18.1016	162.914	20.6	25.288	364.147
						2.2	0.541246	0.487121	2.2	3.50594	6.3107	4.3	7.10049	25.5618	10.6	17.8832	160.949	21.1	24.8104	357.27
						2.25	0.468795	0.421915	2.25	3.46124	6.23024	4.4	7.01189	25.2428	10.85	17.6629	158.966	21.6	24.3277	350.319
						2.3	0.392984	0.353686	2.3	3.41615	6.14907	4.5	6.92249	24.921	11.1	17.4406	156.965	22.1	23.8397	343.292
						2.35	0.312848	0.281563	2.35	3.37066	6.06719	4.6	6.8323	24.5963	11.35	17.2163	154.946	22.6	23.3464	336.188
						2.4	0.226651	0.203985	2.4	3.32477	5.98459	4.7	6.74132	24.2688	11.6	16.99	152.91	23.1	22.8478	329.008
						2.45	0.130442	0.117398	2.45	3.27848	5.90127	4.8	6.64954	23.9384	11.85	16.7618	150.856	23.6	22.3436	321.748
						2.5	1.58352e-12	1.42517e-12	2.5	3.2318	5.81723	4.9	6.55697	23.6051	12.1	16.5315	148.784	24.1	21.834	314.409
									2.55	3.1847	5.73246	5	6.46359	23.2689	12.35	16.2993	146.694	24.6	21.3186	306.988
									2.6	3.1372	5.64696	5.1	6.3694	22.9298	12.6	16.065	144.585	25.1	20.7975	299.484
									2.65	3.08929	5.56072	5.2	6.2744	22.5878	12.85	15.8287	142.459	25.6	20.2704	291.894
									2.7	3.04096	5.47373	5.3	6.17857	22.2429	13.1	15.5904	140.314	26.1	19.7373	284.218
									2.75	2.99221	5.38599	5.4	6.08192	21.8949	13.35	15.35	138.15	26.6	19.198	276.452
									2.8	2.94305	5.29748	5.5	5.98443	21.5439	13.6	15.1076	135.968	27.1	18.6523	268.594
									2.85	2.89345	5.20821	5.6	5.88609	21.1899	13.85	14.863	133.767	27.6	18.1001	260.641
									2.9	2.84342	5.11816	5.7	5.7869	20.8328	14.1	14.6163	131.547	28.1	17.541	252.591
									2.95	2.79295	5.02732	5.8	5.68684	20.4726	14.35	14.3675	129.307	28.6	16.975	244.439
									3	2.74204	4.93568	5.9	5.58591	20.1093	14.6	14.1164	127.048	29.1	16.4016	236.183
									3.05	2.69068	4.84322	6	5.48409	19.7427	14.85	13.8632	124.769	29.6	15.8207	227.819
									3.1	2.63886	4.74994	6.1	5.38136	19.3729	15.1	13.6078	122.47	30.1	15.232	219.34
									3.15	2.58657	4.65582	6.2	5.27771	18.9998	15.35	13.35	120.15	30.6	14.635	210.744
									3.2	2.5338	4.56085	6.3	5.17314	18.6233	15.6	13.09	117.81	31.1	14.0293	202.022
									3.25	2.48056	4.465	6.4	5.06761	18.2434	15.85	12.8276	115.448	31.6	13.4146	193.17
									3.3	2.42681	4.36826	6.5	4.96111	17.86	16.1	12.5628	113.065	32.1	12.7903	184.18
									3.35	2.37257	4.27062	6.6	4.85363	17.4731	16.35	12.2956	110.66	32.6	12.1557	175.043
									3.4	2.3178	4.17204	6.7	4.74513	17.0825	16.6	12.0259	108.233	33.1	11.5103	165.749
									3.45	2.26251	4.07252	6.8	4.6356	16.6882	16.85	11.7536	105.783	33.6	10.8532	156.287
									3.5	2.20667	3.97201	6.9	4.52502	16.2901	17.1	11.4787	103.309	34.1	10.1835	146.643
									3.55	2.15028	3.8705	7	4.41335	15.888	17.35	11.2012	100.811	34.6	9.50009	136.801
									3.6	2.09331	3.76797	7.1	4.30056	15.482	17.6	10.9209	98.2883	35.1	8.80158	126.743
									3.65	2.03576	3.66436	7.2	4.18663	15.0719	17.85	10.6378	95.7404	35.6	8.08633	116.443
									3.7	1.97759	3.55967	7.3	4.07152	14.6575	18.1	10.3518	93.1664	36.1	7.35228	105.873
									3.75	1.9188	3.45383	7.4	3.95518	14.2387	18.35	10.0628	90.5655	36.6	6.59674	94.9931
									3.8	1.85935	3.34683	7.5	3.83759	13.8153	18.6	9.77075	87.9368	37.1	5.81615	83.7526
									3.85	1.79922	3.2386	7.6	3.7187	13.3873	18.85	9.47548	85.2793	37.6	5.00556	72.0801
									3.9	1.73839	3.12911	7.7	3.59844	12.9544	19.1	9.1769	82.5921	38.1	4.15766	59.8703
									3.95	1.67683	3.01829	7.8	3.47678	12.5164	19.35	8.87488	79.8739	38.6	3.26066	46.9535
									4	1.61449	2.90609	7.9	3.35365	12.0731	19.6	8.56928	77.1235	39.1	2.29271	33.0151
									4.05	1.55135	2.79244	8	3.22899	11.6243	19.85	8.25994	74.3394	39.2	2.08707	30.0539
									4.1	1.48737	2.67726	8.1	3.10271	11.1697	20.1	7.94668	71.5201	39.3	1.87609	27.0157
									4.15	1.42248	2.56047	8.2	2.97473	10.709	20.35	7.62931	68.6638	39.4	1.65885	23.8874
									4.2	1.35665	2.44198	8.3	2.84497	10.2419	20.6	7.30762	65.7686	39.5	1.43407	20.6506
									4.25	1.28982	2.32167	8.4	2.71331	9.76791	20.85	6.98135	62.8321	39.6	1.19992	17.2789
									4.3	1.2219	2.19942	8.5	2.57963	9.28668	21.1	6.65022	59.852	39.7	0.953478	13.7301
									4.35	1.15282	2.07508	8.6	2.4438	8.79768	21.35	6.31392	56.8252	39.8	0.689519	9.92908
									4.4	1.08249	1.94848	8.7	2.30565	8.30032	21.6	5.97206	53.7486	39.9	0.396124	5.70419
									4.45	1.01079	1.81943	8.8	2.16498	7.79394	21.85	5.62423	50.6181	39.91	0.364113	5.24323
									4.5	0.937589	1.68766	8.9	2.02158	7.2777	22.1	5.26991	47.4292	39.92	0.331379	4.77186
									4.55	0.862717	1.55289	9	1.87518	6.75064	22.35	4.9085	44.1765	39.93	0.297812	4.28849
									4.6	0.785969	1.41474	9.1	1.72543	6.21157	22.6	4.53926	40.8533	39.94	0.263267	3.79104
									4.65	0.707078	1.27274	9.2	1.57194	5.65898	22.85	4.16128	37.4515	39.95	0.227542	3.27661
									4.7	0.625695	1.12625	9.3	1.41416	5.09097	23.1	3.77344	33.9609	39.96	0.190346	2.74099
									4.75	0.541337	0.974407	9.4	1.25139	4.50501	23.35	3.37424	30.3681	39.97	0.151218	2.17754
									4.8	0.453301	0.815942	9.5	1.08267	3.89763	23.6	2.96171	26.6554	39.98	0.109331	1.57436
									4.85	0.360479	0.648862	9.6	0.906602	3.26377	23.85	2.53307	22.7976	39.99	0.0627956	0.904257
									4.9	0.260884	0.469592	9.7	0.720958	2.59545	24.1	2.08415	18.7573	39.991	0.0577197	0.831164
									4.91	0.239845	0.43172	9.8	0.521769	1.87837	24.35	1.60808	14.4727	39.992	0.0525295	0.756425
									4.92	0.218321	0.392978	9.9	0.29998	1.07993	24.6	1.09161	9.82445	39.993	0.0472075	0.679788
									4.93	0.196241	0.353234	9.91	0.275759	0.992733	24.85	0.498572	4.48715	39.994	0.0417306	0.60092
									4.94	0.173508	0.312315	9.92	0.250987	0.903554	24.87	0.444677	4.00209	39.995	0.036067	0.519365
									4.95	0.14999	0.269982	9.93	0.225581	0.81209	24.89	0.38908	3.50172	39.996	0.0301706	0.434456
									4.96	0.125494	0.225889	9.94	0.199429	0.717944	24.91	0.331401	2.98261	39.997	0.0239681	0.345141
									4.97	0.0997144	0.179486	9.95	0.17238	0.620568	24.93	0.271065	2.43958	39.998	0.0173285	0.249531
									4.98	0.0721061	0.129791	9.96	0.144212	0.519164	24.95	0.207112	1.86401	39.999	0.00995265	0.143318
									4.99	0.0414224	0.0745603	9.97	0.114576	0.412474	24.97	0.137645	1.23881
												9.98	0.0828448	0.298241	24.99	0.0571608	0.514448
												9.99	0.0475866	0.171312	24.991	0.0525405	0.472865
															24.992	0.0478161	0.430345
															24.993	0.0429717	0.386745
															24.994	0.0379863	0.341876
															24.995	0.0328309	0.295478
															24.996	0.0274636	0.247172
															24.997	0.0218176	0.196359
															24.998	0.0157738	0.141964
															24.999	0.00905971	0.0815374
