# Supplementary material for: Quantifying crowding-ventilation effect on respiratory infections
Source: Research Square preprint supplement (doi:10.21203/rs.3.rs-7664648/v1), 2025-10-09
Supplement: Supplementary file 26 [file Figure 3d.xlsx]

## Sheet: Spaciousness ventilation Fig3d
Table 1. Required spaciousness for targeted effective clean airflow with two exposure periods when clean air equivalent is 1 L/s person.
Clean air equivalent (L/s.p)	1
Effective clean flow rate (L/s.p)	exposure time: 1 hr		exposure time: 4 hr
	required VTAC (L/s.p)	required spaciousness (m3/person)	required VTAC (L/s.p)	required spaciousness (m3/person)
1	0	0	0	0
2	1.29272	2.32689	1.29272	9.30757
3	2.37492	4.27485	2.37492	17.0994
4	3.42353	6.16235	3.42353	24.6494
5	4.45744	8.02339	4.45744	32.0936
6	5.48316	9.86968	5.48316	39.4787
7	6.50369	11.7066	6.50369	46.8266
8	7.52067	13.5372	7.52067	54.1488
9	8.53508	15.3631	8.53508	61.4526
10	9.54754	17.1856	9.54754	68.7423
11	10.5585	19.0053	10.5585	76.0211
12	11.5682	20.8228	11.5682	83.2911
13	12.577	22.6385	12.577	90.5541
14	13.5849	24.4528	13.5849	97.8111
15	14.5921	26.2658	14.5921	105.063
16	15.5987	28.0777	15.5987	112.311
17	16.6049	29.8888	16.6049	119.555
18	17.6105	31.699	17.6105	126.796
19	18.6158	33.5085	18.6158	134.034
20	19.6208	35.3174	19.6208	141.27
21	20.6255	37.1258	20.6255	148.503
22	21.6298	38.9337	21.6298	155.735
23	22.634	40.7411	22.634	162.965
24	23.6379	42.5482	23.6379	170.193
25	24.6416	44.3549	24.6416	177.419
26	25.6451	46.1612	25.6451	184.645
27	26.6485	47.9673	26.6485	191.869
28	27.6517	49.773	27.6517	199.092
29	28.6547	51.5785	28.6547	206.314
30	29.6577	53.3838	29.6577	213.535
