# Supplementary material for: Quantifying crowding-ventilation effect on respiratory infections
Source: Research Square preprint supplement (doi:10.21203/rs.3.rs-7664648/v1), 2025-10-09
Supplement: Supplementary file 32 [file Figure 4c.xlsx]

## Sheet: Fig4c. ASHRAE 62.1
Table 1: Clean air equivalent versus spaciousness for ASHRAE 62.1 for 84 space categories.
			Inhalation flow rate (L/s):		0.1	deposition and inactivation rate (h-1):		0.93
no	Space type	N, people / 100 m2	Physical activity	Exposure time (hr)	ASHRAE outdoor air rate (L/s.p)	Met Value	Met*Delta t	Inhalation rate (P), L/s	Vp (m3/p)	qc: ASHRAE clean air equivalent (L/s.p)	nc: ASHRAE clean air equivalent (ach)	qe: effective clean flow rate (L/s.p)	qa = qe-qc	increase (%)	iFt (h)	a
1	Lobbies (public assembly spaces)	150	Sedentary/Passive	0.1	2.7	1.5	0.15	0.0760684	2	3.21667	5.79	13.3549	10.1382	315.177	0.00112319	4.15177
2	Telephone/data entry	60	Sedentary/Passive	0.1	3	1.5	0.15	0.0760684	5	4.29167	3.09	30.711	26.4193	615.596	0.000488424	7.15596																					1
3	Lobbies/prefunction	30	light exercise	0.1	4.8	2	0.2	0.20812	10	7.38333	2.658	60.5848	53.2015	720.562	0.000330116	8.20562
4	Main entry lobbies (office buildings)	10	light exercise	0.1	5.5	2	0.2	0.20812	30	13.25	1.59	175.616	162.366	1225.4	0.000113885	13.254
5	Occupiable storage rooms for liquids and gels	2	Sedentary/Passive	0.1	32.5	1.5	0.15	0.0760684	150	71.25	1.71	881.502	810.252	1137.2	1.70164e-05	12.372
6	Occupiable storage rooms for dry materials	2	Sedentary/Passive	0.1	17.5	1.5	0.15	0.0760684	150	56.25	1.35	871.251	815.001	1448.89	1.72166e-05	15.4889
7	Animal surgery scrub	20	light exercise	0.1	9.5	2.3	0.23	0.20812	15	13.375	3.21	92.4833	79.1083	591.464	0.000248694	6.91464
8	Booking/waiting	50	Sedentary/Passive	0.5	4.4	1.5	0.75	0.0760684	6	5.95	3.57	11.1469	5.19692	87.3431	0.00672832	1.87343
9	Mall common areas	40	light exercise	0.5	4.55	2.3	1.15	0.20812	7.5	6.4875	3.114	13.1564	6.66888	102.796	0.00874101	2.02796
10	Reception areas	30	Sedentary/Passive	0.5	3.5	1.5	0.75	0.0760684	10	6.08333	2.19	15.5079	9.42455	154.924	0.00483625	2.54924
11	Coffee stations	20	Sedentary/Passive	0.5	4	1.5	0.75	0.0760684	15	7.875	1.89	22.3025	14.4275	183.206	0.00336286	2.83206
12	Bank vaults or safe deposit	5	light exercise	0.5	8.5	2.3	1.15	0.20812	60	24	1.44	83.5783	59.5783	248.243	0.00137596	3.48243
13	Animal exam room	20	light/moderate	0.5	8	2.8	1.4	0.298032	15	11.875	2.85	25.427	13.552	114.122	0.00550596	2.14122
14	Animal preparation rooms	20	moderate exercise	0.5	9.5	3.5	1.75	0.37254	15	13.375	3.21	26.6375	13.2625	99.1588	0.00656969	1.99159
15	Animal procedure room	20	light/moderate	0.5	9.5	3	1.5	0.31932	15	13.375	3.21	26.6375	13.2625	99.1588	0.00563116	1.99159
16	Large-animal holding room	20	moderate exercise	0.5	9.5	3.5	1.75	0.37254	15	13.375	3.21	26.6375	13.2625	99.1588	0.00656969	1.99159
17	Lecture hall (fixed seats)	150	Sedentary/Passive	1	4	1.8	1.8	0.0883333	2	4.51667	8.13	5.14993	0.633261	14.0205	0.0349519	1.14021
18	Multi-use assembly	100	Sedentary/Passive	1	4.1	1.8	1.8	0.0883333	3	4.875	5.85	5.87667	1.00167	20.547	0.0306296	1.20547
19	Bars, cocktail lounges	100	moderate exercise	1	4.7	2	2	0.457692	3	5.475	6.57	6.45632	0.981319	17.9236	0.0309774	1.17924
20	Cafeteria/fast-food dining	100	moderate exercise	1	4.7	2	2	0.457692	3	5.475	6.57	6.45632	0.981319	17.9236	0.0309774	1.17924
21	Transportation waiting	100	light exercise	1	4.1	3.5	3.5	0.20812	3	4.875	5.85	5.87667	1.00167	20.547	0.0595576	1.20547
22	Restaurant dining rooms	70	moderate exercise	1	5.08571	2	2	0.457692	4.28571	6.19286	5.202	7.65661	1.46376	23.6362	0.0261212	1.23636
23	Lecture classroom	65	Sedentary/Passive	1	4.26154	1.8	1.8	0.0883333	4.61538	5.45385	4.254	7.0989	1.64505	30.1631	0.0253561	1.30163
24	Break rooms (crowded)	50	Sedentary/Passive	1	3.7	1.5	1.5	0.0760684	6	5.25	3.15	7.54155	2.29155	43.6485	0.0198898	1.43649
25	Bowling Alley	40	moderate exercise	1	6.5	3.8	3.8	0.457692	7.5	8.4375	4.05	11.1403	2.70276	32.0327	0.0341105	1.32033
26	Health club (aerobic rooms)	40	heavy exercise	1	10.75	8	8	0.849145	7.5	12.6875	6.09	15.1734	2.48588	19.5931	0.0527239	1.19593
27	Classroom (age 9 plus)	35	Sedentary/Passive	1	6.71429	1.8	1.8	0.08	8.57143	8.92857	3.75	12.0721	3.14351	35.2074	0.0149104	1.35207
28	Music/theater/dance	35	heavy exercise	1	5.85714	7.8	7.8	0.816667	8.57143	8.07143	3.39	11.2894	3.21794	39.8683	0.0690915	1.39868
29	Classroom (ages 5-8)	25	Sedentary/Passive	1	7.4	1.8	1.8	0.0783333	12	10.5	3.15	15.0831	4.5831	43.6485	0.0119339	1.43649
30	Computer lab	25	Sedentary/Passive	1	7.4	1.5	1.5	0.0707895	12	10.5	3.15	15.0831	4.5831	43.6485	0.00994491	1.43649
31	Daycare (through age 4)	25	moderate exercise	1	8.6	3.3	3.3	0.320833	12	11.7	3.51	16.1688	4.46877	38.1946	0.0204097	1.38195
32	Media center	25	Sedentary/Passive	1	7.4	1.5	1.5	0.0707895	12	10.5	3.15	15.0831	4.5831	43.6485	0.00994491	1.43649
33	Science laboratories	25	moderate exercise	1	8.6	4.5	4.5	0.363889	12	11.7	3.51	16.1688	4.46877	38.1946	0.0278314	1.38195
34	University/college laboratories	25	moderate exercise	1	8.6	3.5	3.5	0.433333	12	11.7	3.51	16.1688	4.46877	38.1946	0.0216467	1.38195
35	Break rooms (spacious)	25	Sedentary/Passive	1	3.7	1.5	1.5	0.0760684	12	6.8	2.04	11.8561	5.05612	74.3547	0.0126517	1.74355
36	Art classroom	20	moderate exercise	1	9.5	3.3	3.3	0.363889	15	13.375	3.21	19.0786	5.70364	42.6441	0.0172968	1.42644
37	Wood/metal shop	20	moderate exercise	1	9.5	3.3	3.3	0.441228	15	13.375	3.21	19.0786	5.70364	42.6441	0.0172968	1.42644
38	Kitchen (cooking)	20	moderate exercise	1	6.8	3.3	3.3	0.457692	15	10.675	2.562	16.6851	6.01008	56.3005	0.0197782	1.563
39	Coin-operated laundries	20	light exercise	1	6.8	2	2	0.20812	15	10.675	2.562	16.6851	6.01008	56.3005	0.0119868	1.563
40	Banks or bank lobbies	15	light exercise	1	5.8	2	2	0.20812	20	10.9667	1.974	19.4521	8.48539	77.3744	0.0102817	1.77374
41	Health club (weight rooms)	10	heavy exercise	1	13	6	6	0.849145	30	20.75	2.49	32.8484	12.0984	58.3053	0.0182658	1.58305
42	Laundry rooms, central	10	moderate exercise	1	8.5	4	4	0.457692	30	16.25	1.95	29.0106	12.7606	78.5266	0.0137881	1.78527
43	Laundry rooms within dwelling units	10	moderate exercise	1	8.5	4	4	0.457692	30	16.25	1.95	29.0106	12.7606	78.5266	0.0137881	1.78527
44	Pharmacy (prep. area)	10	light exercise	1	11.5	1.8	1.8	0.20812	30	19.25	2.31	31.5538	12.3038	63.9157	0.00570455	1.63916
45	Photo studios	10	light exercise	1	8.5	1.8	1.8	0.20812	30	16.25	1.95	29.0106	12.7606	78.5266	0.00620463	1.78527
46	Pet shops (animal areas)	10	moderate exercise	1	12.8	4.3	4.3	0.457692	30	20.55	2.466	32.6749	12.1249	59.002	0.0131599	1.59002
47	Libraries (public assembly spaces)	10	Sedentary/Passive	1	8.5	1.5	1.5	0.0883333	30	16.25	1.95	29.0106	12.7606	78.5266	0.00517053	1.78527
48	Supermarket	8	light exercise	1	7.55	2.3	2.3	0.20812	37.5	17.2375	1.6548	33.7198	16.4823	95.619	0.00682091	1.95619
49	Gym, sports arena (play area)	7	heavy exercise	1	22.8571	7	7	0.849145	42.8571	33.9286	2.85	50.6836	16.755	49.3833	0.0138112	1.49383
50	Shipping/receiving	2	heavy exercise	1	35	8	8	0.849145	150	73.75	1.77	138.821	65.0705	88.2312	0.00576284	1.88231
51	Animal imaging (MRI/CT/PET)	20	light/moderate	1	9.5	3	3	0.31932	15	13.375	3.21	19.0786	5.70364	42.6441	0.0157244	1.42644
52	Animal necropsy	20	moderate/vigorous	1	9.5	4.5	4.5	0.47898	15	13.375	3.21	19.0786	5.70364	42.6441	0.0235866	1.42644
53	Animal postoperative recovery room	20	light exercise	1	9.5	2.5	2.5	0.2661	15	13.375	3.21	19.0786	5.70364	42.6441	0.0131037	1.42644
54	Small-animal-cage room (static cages)	20	light exercise	1	9.5	2.3	2.3	0.20812	15	13.375	3.21	19.0786	5.70364	42.6441	0.0120554	1.42644
55	Small-animal-cage room (ventilated cages)	20	light exercise	1	9.5	2.3	2.3	0.20812	15	13.375	3.21	19.0786	5.70364	42.6441	0.0120554	1.42644
56	Auditorium seating area	150	Sedentary/Passive	2	2.7	1.5	3	0.0760684	2	3.21667	5.79	3.5207	0.30403	9.4517	0.0852104	1.09452
57	Spectator areas	150	moderate exercise	2	4	3.3	6.6	0.457692	2	4.51667	8.13	4.81265	0.295981	6.55308	0.137139	1.06553
58	Places of religious worship	120	Sedentary/Passive	2	2.75	1.3	2.6	0.0760684	2.5	3.39583	4.89	3.78258	0.386745	11.3888	0.0687362	1.11389
59	Multi-purpose assembly	120	Sedentary/Passive	2	2.75	1.5	3	0.0760684	2.5	3.39583	4.89	3.78258	0.386745	11.3888	0.079311	1.11389
60	Disco/Dance floors	100	heavy exercise	2	10.3	7.8	15.6	0.849145	3	11.075	13.29	11.508	0.432955	3.9093	0.135558	1.03909
61	Courtrooms	70	Sedentary/Passive	2	2.92857	1.5	3	0.0760684	4.28571	4.03571	3.39	4.733	0.69729	17.278	0.0633847	1.17278
62	Stages, studios	70	moderate exercise	2	5.42857	3.3	6.6	0.457692	4.28571	6.53571	5.49	7.19058	0.654869	10.0199	0.0917867	1.1002
63	Conference/meeting	50	Sedentary/Passive	2	3.1	1.5	3	0.0760684	6	4.65	2.79	5.66062	1.01062	21.7338	0.0529977	1.21734
64	Museums (children's)	40	moderate exercise	2	5.3	3.3	6.6	0.363889	7.5	7.2375	3.474	8.45293	1.21543	16.7935	0.0780794	1.16794
65	Museums (galleries)	40	light exercise	2	4.55	2	4	0.20754	7.5	6.4875	3.114	7.7255	1.238	19.0828	0.0517766	1.19083
66	Dayroom	30	Sedentary/Passive	2	3.5	1.3	2.6	0.0760684	10	6.08333	2.19	7.85403	1.7707	29.1074	0.033104	1.29107
67	Daycare sickroom	25	Sedentary/Passive	2	8.6	1.3	2.6	0.0760684	12	11.7	3.51	13.6415	1.9415	16.594	0.0190595	1.16594
68	Barbershop	25	Sedentary/Passive	2	5	1.3	2.6	0.0760684	12	8.1	2.43	10.178	2.07801	25.6544	0.0255453	1.25654
69	Beauty and nail salons	25	Sedentary/Passive	2	12.4	1.3	2.6	0.0760684	12	15.5	4.65	17.3673	1.86728	12.047	0.0149707	1.12047
70	Sorting, packing, light assembly	7	moderate exercise	2	12.3714	3.5	7	0.457692	42.8571	23.4429	1.9692	31.214	7.77118	33.1494	0.0224258	1.33149
71	Computer (not printing)	4	Sedentary/Passive	2	10	1.5	3	0.0760684	75	29.375	1.41	44.0717	14.6967	50.0314	0.00680708	1.50031
72	Animal operating rooms	20	moderate exercise	2	9.5	3.5	7	0.37254	15	13.375	3.21	15.838	2.46295	18.4146	0.0441976	1.18415
73	Gambling Casinos	120	moderate exercise	4	4.55	2.5	10	0.457692	2.5	5.19583	7.482	5.37545	0.179613	3.45686	0.186031	1.03457
74	Legislative chambers	50	Sedentary/Passive	4	3.1	1.5	6	0.0760684	6	4.65	2.79	5.10767	0.45767	9.84237	0.11747	1.09842
75	Cell	25	Sleep or Nap	4	4.9	1	4	0.0794017	12	8	2.4	8.93016	0.930162	11.627	0.044792	1.11627
76	Game arcades	20	moderate exercise	4	8.3	5.8	23.2	0.457692	15	12.175	2.922	13.3141	1.13912	9.3562	0.174251	1.09356
77	Guard stations	15	Sedentary/Passive	4	4.5	1.3	5.2	0.0760684	20	9.66667	1.74	11.2868	1.62013	16.7599	0.0460715	1.1676
78	Sales (except as below)	15	moderate exercise	4	7.8	2.3	9.2	0.457692	20	12.9667	2.334	14.522	1.55535	11.995	0.0633521	1.11995
79	Libraries (educational facilities)	10	Sedentary/Passive	4	8.5	1.5	6	0.0883333	30	16.25	1.95	18.6386	2.38858	14.699	0.0321913	1.14699
80	Manufactoring (excludes heavy industrial and process using chemicals )	7	moderate exercise	4	17.8571	3	12	0.457692	42.8571	28.9286	2.43	32.2458	3.31727	11.4671	0.0372141	1.11467
81	Barracks, sleeping areas	20	Sleep or Nap	8	4	1	8	0.0794017	15	7.875	1.89	8.43272	0.557719	7.08215	0.0948686	1.07082
82	Bedroom/living room	10	Sedentary/Passive	8	5.5	1.3	10.4	0.0760684	30	13.25	1.59	14.3805	1.13054	8.5324	0.0723199	1.08532
83	Office space	5	Sedentary/Passive	8	8.5	1.5	12	0.0760684	60	24	1.44	26.2813	2.28134	9.5056	0.0456598	1.09506
84	Manufacturing where hazardous materials are not used	7	moderate exercise	8	17.8571	3	24	0.0760684	42.8571	28.9286	2.43	30.4974	1.56879	5.42299	0.0786953	1.05423
