# Supplementary material for: Quantifying crowding-ventilation effect on respiratory infections
Source: Research Square preprint supplement (doi:10.21203/rs.3.rs-7664648/v1), 2025-10-09
Supplement: Supplementary file 34 [file Figure 4d.xlsx]

## Sheet: Fig4d. ASHRAE 241
Table 1: Clean air equivalent versus spaciousness for ASHRAE 241 for 29 occupancy categories
			Inhalation flow rate (L/s):		0.1	deposition and inactivation rate (h-1):		0.93
no	Occupancy category	occupant density (persons/100 sq m)	Physical activity	Exposure time (hr)	ASHRAE ECAi (L/s.p)	Met Value	Met*Delta t	Inhalation rate (P), L/s	Vp (m3/p)	qc: ASHRAE clean air equivalent (L/s.p)	nc: ASHRAE clean air equivalent (ach)	qe: effective clean flow rate (L/s.p)	qa = qe-qc	increase (%)	iFt (h)	a
1	Auditorium	150	Sedentary/Passive	2	25	1.3	2.6	0.0760684	2	25.5167	45.93	25.7975	0.280835	1.10059	0.0100785	1.01101
2	Classroom: daycare	25	Light/Moderate	4	20	1.8	7.2	0.320833	12	23.1	6.93	23.9645	0.864521	3.74251	0.0300444	1.03743
3	Classroom: elementary school	25	Sedentary/Passive	4	20	1.3	5.2	0.0783333	12	23.1	6.93	23.9645	0.864521	3.74251	0.0216987	1.03743
4	Classroom: high school	35	Sedentary/Passive	4	20	1.3	5.2	0.1	8.57143	22.2143	9.33	22.8259	0.611627	2.7533	0.0227811	1.02753
5	Convention	150	Sedentary/Passive	4	30	1.3	5.2	0.0883333	2	30.5167	54.93	30.6562	0.139524	0.457206	0.0169623	1.00457
6	Corectional cell	25	Sleep or Nap	8	15	1	8	0.0794017	12	18.1	5.43	18.5265	0.426484	2.35627	0.0431814	1.02356
7	Correctional dayroom	30	Sedentary/Passive	4	20	1.3	5.2	0.0783333	10	22.5833	8.13	23.2998	0.716476	3.17259	0.0223178	1.03173
8	Food & beverage facilities: cafeteria	100	moderate exercise	1	30	2	2	0.457692	3	30.775	36.93	31.6315	0.856527	2.78319	0.00632281	1.02783
9	Food & beverage facilities: restaurant	70	moderate exercise	1	30	2	2	0.457692	4.28571	31.1071	26.13	32.345	1.23785	3.97931	0.00618334	1.03979
10	Gym	7	heavy exercise	1	40	7	7	0.849145	42.8571	51.0714	4.29	66.3184	15.247	29.8542	0.0105551	1.29854
11	Health care exam room	20	Sedentary/Passive	1	20	1.3	1.3	0.1	15	23.875	5.73	28.9027	5.02773	21.0585	0.00449785	1.21059
12	Health care group treament area	20	Sedentary/Passive	1	35	1.3	1.3	0.1	15	38.875	9.33	43.5414	4.6664	12.0036	0.00298566	1.12004
13	Health care patient room	20	Sleep or Nap	8	35	1	8	0.076	15	38.875	9.33	39.4029	0.527906	1.35796	0.0203031	1.01358
14	Health care resident room	20	Sleep or Nap	8	25	1	8	0.076	15	28.875	6.93	29.4054	0.5304	1.83688	0.0272059	1.01837
15	Health care waiting room	50	Sedentary/Passive	2	45	1.3	2.6	0.1	6	46.55	27.93	47.3985	0.848524	1.82282	0.0054854	1.01823
16	Lecture hall	150	Sedentary/Passive	1	25	1.3	1.3	0.0883333	2	25.5167	45.93	26.0846	0.56792	2.22568	0.00498379	1.02226
17	Lobbies	150	Sedentary/Passive	0.5	25	1.5	0.75	0.0760684	2	25.5167	45.93	26.6784	1.1617	4.5527	0.00281127	1.04553
18	Manufacturing	7	moderate exercise	4	25	3	12	0.441228	42.8571	36.0714	3.03	39.3152	3.24381	8.99275	0.0305225	1.08993
19	Museum	40	light exercise	4	30	1.8	7.2	0.20754	7.5	31.9375	15.33	32.467	0.529468	1.65782	0.0221764	1.01658
20	Office: call center	60	Sedentary/Passive	4	15	1.5	6	0.1	5	16.2917	11.73	16.6465	0.354784	2.1777	0.0360437	1.02178
21	Office: general	5	Sedentary/Passive	4	15	1.5	6	0.0760684	60	30.5	1.83	35.3222	4.82225	15.8107	0.0169865	1.15811
22	Place of religious workship	120	Sedentary/Passive	2	25	1.3	2.6	0.0760684	2.5	25.6458	36.93	25.9978	0.351988	1.3725	0.0100008	1.01372
23	Residential common space	30	Sedentary/Passive	4	25	1.3	5.2	0.0760684	10	27.5833	9.93	28.2957	0.712379	2.58264	0.0183773	1.02583
24	Residential dwelling unit	3	Sleep or Nap	8	15	1	8	0.0760684	100	40.8333	1.47	44.6282	3.79489	9.2936	0.0179259	1.09294
25	Retail	15	light exercise	1	20	1.8	1.8	0.457692	20	25.1667	4.53	32.1977	7.03104	27.9379	0.00559046	1.27938
26	Sorting, packagin, light assembly	7	moderate exercise	4	10	3.5	14	0.457692	42.8571	21.0714	1.77	24.5337	3.4623	16.4312	0.0570643	1.16431
27	Spectator area	150	Sedentary/Passive	2	25	1.3	2.6	0.457692	2	25.5167	45.93	25.7975	0.280835	1.10059	0.0100785	1.01101
28	Transportation waiting	100	Sedentary/Passive	1	30	1.3	1.3	0.1	3	30.775	36.93	31.6315	0.856527	2.78319	0.00410982	1.02783
29	Warehouse	2	moderate exercise	4	10	2	8	0.458	150	48.75	1.17	61.8414	13.0914	26.8541	0.0129363	1.26854
