# Supplementary material for: Quantifying crowding-ventilation effect on respiratory infections
Source: Research Square preprint supplement (doi:10.21203/rs.3.rs-7664648/v1), 2025-10-09
Supplement: Supplementary file 36 [file Figure Supplementary.xlsx]

## Sheet: Fig S1. Ct & y
		Spaciousness dilution factor (γ) for Δt0 = 0, 0.5 and 1 hours
nDt	CT	Gamma_0	Gamma_0.5	Gamma_1
0.0001	0.99995	19999.7	9999.54	6666.19
0.00015	0.999925	13333	6666.21	4443.96
0.000225	0.999888	8888.56	4443.99	2962.48
0.0003375	0.999831	5925.59	2962.5	1974.83
0.00050625	0.999747	3950.28	1974.85	1316.39
0.000759375	0.99962	2633.41	1316.41	877.434
0.00113906	0.999431	1755.5	877.457	584.795
0.00170859	0.999146	1170.22	584.818	389.703
0.00256289	0.99872	780.036	389.726	259.642
0.00384434	0.99808	519.913	259.665	172.934
0.0057665	0.997122	346.498	172.957	115.129
0.00864976	0.995688	230.888	115.153	76.5931
0.0129746	0.993541	153.814	76.6162	50.9025
0.019462	0.990332	102.432	50.9256	33.7758
0.0291929	0.985545	68.178	33.799	22.3588
0.0437894	0.978421	45.3423	22.382	14.7484
0.0656841	0.967865	30.1191	14.7716	9.67634
0.0985261	0.952316	19.9713	9.6996	6.29724
0.147789	0.929615	13.2076	6.32055	4.0479
0.221684	0.896914	8.70066	4.07126	2.5534
0.332526	0.850731	5.69929	2.57678	1.56455
0.498789	0.787376	3.70314	1.58786	0.916247
0.748183	0.704072	2.3792	0.939265	0.499666
1.12227	0.600977	1.50612	0.521824	0.243227
1.68341	0.483697	0.936847	0.263362	0.0987097
2.52512	0.36432	0.573119	0.114923	0.0300395
3.78768	0.258035	0.347772	0.0404013	0.00587837
5.68151	0.17541	0.212723	0.0103466	0.000598223
8.52227	0.117316	0.132909	0.00165764	2.3345e-05
12.7834	0.0782262	0.0848649	0.000131078	2.19579e-07
19.1751	0.052151	0.0550203	3.57637e-06	2.45256e-10
28.7627	0.0347673	0.0360196	1.97442e-08	1.12126e-14
43.144	0.0231782	0.0237282	9.91931e-12	4.24506e-21
64.716	0.0154521	0.0156946	1.36802e-16	1.21114e-30
97.074	0.0103014	0.0104086	8.58127e-24	7.14835e-45
145.611	0.00686761	0.00691511	1.65115e-34	3.96981e-66
218.416	0.00457841	0.00459947	1.70682e-50	6.36297e-98
327.625	0.00305227	0.00306162	2.19701e-74	1.5814e-145
491.437	0.00203485	0.002039	3.92957e-110	7.58854e-217
737.155	0.00135657	0.00135841	1.15123e-163	0
1105.73	0.000904377	0.000905196	7.07016e-244	0
1658.6	0.000602918	0.000603282	0	0
2487.9	0.000401945	0.000402107	0	0

## Sheet: Fig S2. ASHRAE 62.1
Table 1: Estimated main metrics for ASHRAE 62.1 for 84 space categories.
			Inhalation flow rate (L/s):		0.1	deposition and inactivation rate (h-1):		0.93
no	Space type	N, people / 100 m2	Physical activity	Exposure time (hr)	ASHRAE outdoor air rate (L/s.p)	Met Value	Met*Delta t	Inhalation rate (P), L/s	Vp (m3/p)	qc: ASHRAE physical clean air equivalent (L/s.p)	nd: ASHRAE physical clean air equivalent (ach)	qe: effective clean flow rate (L/s.p)	qa = qe-qc	increase (%)	iFt (h)	Spaciousness factor	qc-tote	Vp-tote
				0.1					1									5.55556
1	Lobbies (public assembly spaces)	150	Sedentary/Passive	0.1	2.7	1.5	0.15	0.0760684	2	3.21667	5.79	13.3549	10.1382	315.177	0.00112319	4.15177	3.21667	11.1111
2	Telephone/data entry	60	Sedentary/Passive	0.1	3	1.5	0.15	0.0760684	5	4.29167	3.09	30.711	26.4193	615.596	0.000488424	7.15596	4.29167	27.7778
3	Lobbies/prefunction	30	light exercise	0.1	4.8	2	0.2	0.20812	10	7.38333	2.658	60.5848	53.2015	720.562	0.000330116	8.20562	7.38333	55.5556
4	Animal surgery scrub	20	light exercise	0.1	9.5	2.3	0.23	0.20812	15	13.375	3.21	92.4833	79.1083	591.464	0.000248694	6.91464	13.375	83.3333
5	Main entry lobbies (office buildings)	10	light exercise	0.1	5.5	2	0.2	0.20812	30	13.25	1.59	175.616	162.366	1225.4	0.000113885	13.254	13.25	166.667
6	Occupiable storage rooms for liquids and gels	2	Sedentary/Passive	0.1	32.5	1.5	0.15	0.0760684	150	71.25	1.71	881.502	810.252	1137.2	1.70164e-05	12.372	71.25	833.333
7	Occupiable storage rooms for dry materials	2	Sedentary/Passive	0.1	17.5	1.5	0.15	0.0760684	150	56.25	1.35	871.251	815.001	1448.89	1.72166e-05	15.4889	56.25	833.333
				0.1					20000									111111
	Space type	N, people / 100 m2	Physical activity	Exposure time (hr)	ASHRAE outdoor air rate (L/s.p)	Met Value	Met*Delta t	Inhalation rate (P), L/s	Vp (m3/p)	qc: ASHRAE physical clean air equivalent (L/s.p)	nd: ASHRAE physical clean air equivalent (ach)	qe: effective clean flow rate (L/s.p)	qa = qe-qc	increase (%)	iFt (h)	Spaciousness factor	qc-tote	Vp-tote
				0.5					1									1.11111
8	Booking/waiting	50	Sedentary/Passive	0.5	4.4	1.5	0.75	0.0760684	6	5.95	3.57	11.1469	5.19692	87.3431	0.00672832	1.87343	5.95	6.66667
9	Mall common areas	40	light exercise	0.5	4.55	2.3	1.15	0.20812	7.5	6.4875	3.114	13.1564	6.66888	102.796	0.00874101	2.02796	6.4875	8.33333
10	Reception areas	30	Sedentary/Passive	0.5	3.5	1.5	0.75	0.0760684	10	6.08333	2.19	15.5079	9.42455	154.924	0.00483625	2.54924	6.08333	11.1111
11	Coffee stations	20	Sedentary/Passive	0.5	4	1.5	0.75	0.0760684	15	7.875	1.89	22.3025	14.4275	183.206	0.00336286	2.83206	7.875	16.6667
12	Animal exam room	20	light/moderate	0.5	8	2.8	1.4	0.298032	15	11.875	2.85	25.427	13.552	114.122	0.00550596	2.14122	11.875	16.6667
13	Animal preparation rooms	20	moderate exercise	0.5	9.5	3.5	1.75	0.37254	15	13.375	3.21	26.6375	13.2625	99.1588	0.00656969	1.99159	13.375	16.6667
14	Animal procedure room	20	light/moderate	0.5	9.5	3	1.5	0.31932	15	13.375	3.21	26.6375	13.2625	99.1588	0.00563116	1.99159	13.375	16.6667
15	Large-animal holding room	20	moderate exercise	0.5	9.5	3.5	1.75	0.37254	15	13.375	3.21	26.6375	13.2625	99.1588	0.00656969	1.99159	13.375	16.6667
16	Bank vaults or safe deposit	5	light exercise	0.5	8.5	2.3	1.15	0.20812	60	24	1.44	83.5783	59.5783	248.243	0.00137596	3.48243	24	66.6667
				0.5					20000									22222.2
	Space type	N, people / 100 m2	Physical activity	Exposure time (hr)	ASHRAE outdoor air rate (L/s.p)	Met Value	Met*Delta t	Inhalation rate (P), L/s	Vp (m3/p)	qc: ASHRAE physical clean air equivalent (L/s.p)	nd: ASHRAE physical clean air equivalent (ach)	qe: effective clean flow rate (L/s.p)	qa = qe-qc	increase (%)	iFt (h)	Spaciousness factor	qc-tote	Vp-tote
				1					1									0.555556
17	Lecture hall (fixed seats)	150	Sedentary/Passive	1	4	1.8	1.8	0.0883333	2	4.51667	8.13	5.14993	0.633261	14.0205	0.0349519	1.14021	4.51667	1.11111
18	Multi-use assembly	100	Sedentary/Passive	1	4.1	1.8	1.8	0.0883333	3	4.875	5.85	5.87667	1.00167	20.547	0.0306296	1.20547	4.875	1.66667
19	Bars, cocktail lounges	100	moderate exercise	1	4.7	2	2	0.457692	3	5.475	6.57	6.45632	0.981319	17.9236	0.0309774	1.17924	5.475	1.66667
20	Cafeteria/fast-food dining	100	moderate exercise	1	4.7	2	2	0.457692	3	5.475	6.57	6.45632	0.981319	17.9236	0.0309774	1.17924	5.475	1.66667
21	Transportation waiting	100	light exercise	1	4.1	3.5	3.5	0.20812	3	4.875	5.85	5.87667	1.00167	20.547	0.0595576	1.20547	4.875	1.66667
22	Restaurant dining rooms	70	moderate exercise	1	5.08571	2	2	0.457692	4.28571	6.19286	5.202	7.65661	1.46376	23.6362	0.0261212	1.23636	6.19286	2.38095
23	Lecture classroom	65	Sedentary/Passive	1	4.26154	1.8	1.8	0.0883333	4.61538	5.45385	4.254	7.0989	1.64505	30.1631	0.0253561	1.30163	5.45385	2.5641
24	Break rooms (crowded)	50	Sedentary/Passive	1	3.7	1.5	1.5	0.0760684	6	5.25	3.15	7.54155	2.29155	43.6485	0.0198898	1.43649	5.25	3.33333
25	Bowling Alley	40	moderate exercise	1	6.5	3.8	3.8	0.457692	7.5	8.4375	4.05	11.1403	2.70276	32.0327	0.0341105	1.32033	8.4375	4.16667
26	Health club (aerobic rooms)	40	heavy exercise	1	10.75	8	8	0.849145	7.5	12.6875	6.09	15.1734	2.48588	19.5931	0.0527239	1.19593	12.6875	4.16667
27	Classroom (age 9 plus)	35	Sedentary/Passive	1	6.71429	1.8	1.8	0.08	8.57143	8.92857	3.75	12.0721	3.14351	35.2074	0.0149104	1.35207	8.92857	4.7619
28	Music/theater/dance	35	heavy exercise	1	5.85714	7.8	7.8	0.816667	8.57143	8.07143	3.39	11.2894	3.21794	39.8683	0.0690915	1.39868	8.07143	4.7619
29	Classroom (ages 5-8)	25	Sedentary/Passive	1	7.4	1.8	1.8	0.0783333	12	10.5	3.15	15.0831	4.5831	43.6485	0.0119339	1.43649	10.5	6.66667
30	Computer lab	25	Sedentary/Passive	1	7.4	1.5	1.5	0.0707895	12	10.5	3.15	15.0831	4.5831	43.6485	0.00994491	1.43649	10.5	6.66667
31	Daycare (through age 4)	25	moderate exercise	1	8.6	3.3	3.3	0.320833	12	11.7	3.51	16.1688	4.46877	38.1946	0.0204097	1.38195	11.7	6.66667
32	Media center	25	Sedentary/Passive	1	7.4	1.5	1.5	0.0707895	12	10.5	3.15	15.0831	4.5831	43.6485	0.00994491	1.43649	10.5	6.66667
33	Science laboratories	25	moderate exercise	1	8.6	4.5	4.5	0.363889	12	11.7	3.51	16.1688	4.46877	38.1946	0.0278314	1.38195	11.7	6.66667
34	University/college laboratories	25	moderate exercise	1	8.6	3.5	3.5	0.433333	12	11.7	3.51	16.1688	4.46877	38.1946	0.0216467	1.38195	11.7	6.66667
35	Break rooms (spacious)	25	Sedentary/Passive	1	3.7	1.5	1.5	0.0760684	12	6.8	2.04	11.8561	5.05612	74.3547	0.0126517	1.74355	6.8	6.66667
36	Art classroom	20	moderate exercise	1	9.5	3.3	3.3	0.363889	15	13.375	3.21	19.0786	5.70364	42.6441	0.0172968	1.42644	13.375	8.33333
37	Wood/metal shop	20	moderate exercise	1	9.5	3.3	3.3	0.441228	15	13.375	3.21	19.0786	5.70364	42.6441	0.0172968	1.42644	13.375	8.33333
38	Kitchen (cooking)	20	moderate exercise	1	6.8	3.3	3.3	0.457692	15	10.675	2.562	16.6851	6.01008	56.3005	0.0197782	1.563	10.675	8.33333
39	Coin-operated laundries	20	light exercise	1	6.8	2	2	0.20812	15	10.675	2.562	16.6851	6.01008	56.3005	0.0119868	1.563	10.675	8.33333
40	Animal imaging (MRI/CT/PET)	20	light/moderate	1	9.5	3	3	0.31932	15	13.375	3.21	19.0786	5.70364	42.6441	0.0157244	1.42644	13.375	8.33333
41	Animal necropsy	20	moderate/vigorous	1	9.5	4.5	4.5	0.47898	15	13.375	3.21	19.0786	5.70364	42.6441	0.0235866	1.42644	13.375	8.33333
42	Animal postoperative recovery room	20	light exercise	1	9.5	2.5	2.5	0.2661	15	13.375	3.21	19.0786	5.70364	42.6441	0.0131037	1.42644	13.375	8.33333
43	Small-animal-cage room (static cages)	20	light exercise	1	9.5	2.3	2.3	0.20812	15	13.375	3.21	19.0786	5.70364	42.6441	0.0120554	1.42644	13.375	8.33333
44	Small-animal-cage room (ventilated cages)	20	light exercise	1	9.5	2.3	2.3	0.20812	15	13.375	3.21	19.0786	5.70364	42.6441	0.0120554	1.42644	13.375	8.33333
45	Banks or bank lobbies	15	light exercise	1	5.8	2	2	0.20812	20	10.9667	1.974	19.4521	8.48539	77.3744	0.0102817	1.77374	10.9667	11.1111
46	Health club (weight rooms)	10	heavy exercise	1	13	6	6	0.849145	30	20.75	2.49	32.8484	12.0984	58.3053	0.0182658	1.58305	20.75	16.6667
47	Laundry rooms, central	10	moderate exercise	1	8.5	4	4	0.457692	30	16.25	1.95	29.0106	12.7606	78.5266	0.0137881	1.78527	16.25	16.6667
48	Laundry rooms within dwelling units	10	moderate exercise	1	8.5	4	4	0.457692	30	16.25	1.95	29.0106	12.7606	78.5266	0.0137881	1.78527	16.25	16.6667
49	Pharmacy (prep. area)	10	light exercise	1	11.5	1.8	1.8	0.20812	30	19.25	2.31	31.5538	12.3038	63.9157	0.00570455	1.63916	19.25	16.6667
50	Photo studios	10	light exercise	1	8.5	1.8	1.8	0.20812	30	16.25	1.95	29.0106	12.7606	78.5266	0.00620463	1.78527	16.25	16.6667
51	Pet shops (animal areas)	10	moderate exercise	1	12.8	4.3	4.3	0.457692	30	20.55	2.466	32.6749	12.1249	59.002	0.0131599	1.59002	20.55	16.6667
52	Libraries (public assembly spaces)	10	Sedentary/Passive	1	8.5	1.5	1.5	0.0883333	30	16.25	1.95	29.0106	12.7606	78.5266	0.00517053	1.78527	16.25	16.6667
53	Supermarket	8	light exercise	1	7.55	2.3	2.3	0.20812	37.5	17.2375	1.6548	33.7198	16.4823	95.619	0.00682091	1.95619	17.2375	20.8333
54	Gym, sports arena (play area)	7	heavy exercise	1	22.8571	7	7	0.849145	42.8571	33.9286	2.85	50.6836	16.755	49.3833	0.0138112	1.49383	33.9286	23.8095
55	Shipping/receiving	2	heavy exercise	1	35	8	8	0.849145	150	73.75	1.77	138.821	65.0705	88.2312	0.00576284	1.88231	73.75	83.3333
				1					20000									11111.1
	Space type	N, people / 100 m2	Physical activity	Exposure time (hr)	ASHRAE outdoor air rate (L/s.p)	Met Value	Met*Delta t	Inhalation rate (P), L/s	Vp (m3/p)	qc: ASHRAE physical clean air equivalent (L/s.p)	nd: ASHRAE physical clean air equivalent (ach)	qe: effective clean flow rate (L/s.p)	qa = qe-qc	increase (%)	iFt (h)	Spaciousness factor	qc-tote	Vp-tote
				2					1									0.277778
56	Auditorium seating area	150	Sedentary/Passive	2	2.7	1.5	3	0.0760684	2	3.21667	5.79	3.5207	0.30403	9.4517	0.0852104	1.09452	3.21667	0.555556
57	Spectator areas	150	moderate exercise	2	4	3.3	6.6	0.457692	2	4.51667	8.13	4.81265	0.295981	6.55308	0.137139	1.06553	4.51667	0.555556
58	Places of religious worship	120	Sedentary/Passive	2	2.75	1.3	2.6	0.0760684	2.5	3.39583	4.89	3.78258	0.386745	11.3888	0.0687362	1.11389	3.39583	0.694444
59	Multi-purpose assembly	120	Sedentary/Passive	2	2.75	1.5	3	0.0760684	2.5	3.39583	4.89	3.78258	0.386745	11.3888	0.079311	1.11389	3.39583	0.694444
60	Disco/Dance floors	100	heavy exercise	2	10.3	7.8	15.6	0.849145	3	11.075	13.29	11.508	0.432955	3.9093	0.135558	1.03909	11.075	0.833333
61	Courtrooms	70	Sedentary/Passive	2	2.92857	1.5	3	0.0760684	4.28571	4.03571	3.39	4.733	0.69729	17.278	0.0633847	1.17278	4.03571	1.19048
62	Stages, studios	70	moderate exercise	2	5.42857	3.3	6.6	0.457692	4.28571	6.53571	5.49	7.19058	0.654869	10.0199	0.0917867	1.1002	6.53571	1.19048
63	Conference/meeting	50	Sedentary/Passive	2	3.1	1.5	3	0.0760684	6	4.65	2.79	5.66062	1.01062	21.7338	0.0529977	1.21734	4.65	1.66667
64	Museums (children's)	40	moderate exercise	2	5.3	3.3	6.6	0.363889	7.5	7.2375	3.474	8.45293	1.21543	16.7935	0.0780794	1.16794	7.2375	2.08333
65	Museums (galleries)	40	light exercise	2	4.55	2	4	0.20754	7.5	6.4875	3.114	7.7255	1.238	19.0828	0.0517766	1.19083	6.4875	2.08333
66	Dayroom	30	Sedentary/Passive	2	3.5	1.3	2.6	0.0760684	10	6.08333	2.19	7.85403	1.7707	29.1074	0.033104	1.29107	6.08333	2.77778
67	Daycare sickroom	25	Sedentary/Passive	2	8.6	1.3	2.6	0.0760684	12	11.7	3.51	13.6415	1.9415	16.594	0.0190595	1.16594	11.7	3.33333
68	Barbershop	25	Sedentary/Passive	2	5	1.3	2.6	0.0760684	12	8.1	2.43	10.178	2.07801	25.6544	0.0255453	1.25654	8.1	3.33333
69	Beauty and nail salons	25	Sedentary/Passive	2	12.4	1.3	2.6	0.0760684	12	15.5	4.65	17.3673	1.86728	12.047	0.0149707	1.12047	15.5	3.33333
70	Animal operating rooms	20	moderate exercise	2	9.5	3.5	7	0.37254	15	13.375	3.21	15.838	2.46295	18.4146	0.0441976	1.18415	13.375	4.16667
71	Sorting, packing, light assembly	7	moderate exercise	2	12.3714	3.5	7	0.457692	42.8571	23.4429	1.9692	31.214	7.77118	33.1494	0.0224258	1.33149	23.4429	11.9048
72	Computer (not printing)	4	Sedentary/Passive	2	10	1.5	3	0.0760684	75	29.375	1.41	44.0717	14.6967	50.0314	0.00680708	1.50031	29.375	20.8333
				2					200000									55555.6
	Space type	N, people / 100 m2	Physical activity	Exposure time (hr)	ASHRAE outdoor air rate (L/s.p)	Met Value	Met*Delta t	Inhalation rate (P), L/s	Vp (m3/p)	qc: ASHRAE physical clean air equivalent (L/s.p)	nd: ASHRAE physical clean air equivalent (ach)	qe: effective clean flow rate (L/s.p)	qa = qe-qc	increase (%)	iFt (h)	Spaciousness factor	qc-tote	Vp-tote
				4					1									0.138889
73	Gambling Casinos	120	moderate exercise	4	4.55	2.5	10	0.457692	2.5	5.19583	7.482	5.37545	0.179613	3.45686	0.186031	1.03457	5.19583	0.347222
74	Legislative chambers	50	Sedentary/Passive	4	3.1	1.5	6	0.0760684	6	4.65	2.79	5.10767	0.45767	9.84237	0.11747	1.09842	4.65	0.833333
75	Cell	25	Sleep or Nap	4	4.9	1	4	0.0794017	12	8	2.4	8.93016	0.930162	11.627	0.044792	1.11627	8	1.66667
76	Game arcades	20	moderate exercise	4	8.3	5.8	23.2	0.457692	15	12.175	2.922	13.3141	1.13912	9.3562	0.174251	1.09356	12.175	2.08333
77	Guard stations	15	Sedentary/Passive	4	4.5	1.3	5.2	0.0760684	20	9.66667	1.74	11.2868	1.62013	16.7599	0.0460715	1.1676	9.66667	2.77778
78	Sales (except as below)	15	moderate exercise	4	7.8	2.3	9.2	0.457692	20	12.9667	2.334	14.522	1.55535	11.995	0.0633521	1.11995	12.9667	2.77778
79	Libraries (educational facilities)	10	Sedentary/Passive	4	8.5	1.5	6	0.0883333	30	16.25	1.95	18.6386	2.38858	14.699	0.0321913	1.14699	16.25	4.16667
80	Manufacturing (excludes heavy industrial and process using chemicals )	7	moderate exercise	4	17.8571	3	12	0.457692	42.8571	28.9286	2.43	32.2458	3.31727	11.4671	0.0372141	1.11467	28.9286	5.95238
				4					200000									27777.8
	Space type	N, people / 100 m2	Physical activity	Exposure time (hr)	ASHRAE outdoor air rate (L/s.p)	Met Value	Met*Delta t	Inhalation rate (P), L/s	Vp (m3/p)	qc: ASHRAE physical clean air equivalent (L/s.p)	nc: ASHRAE physical clean air equivalent (ach)	qe: effective clean flow rate (L/s.p)	qa = qe-qc	increase (%)	iFt (h)	Spaciousness factor	qc-tote	Vp-tote
				8					1									0.0694444
81	Barracks, sleeping areas	20	Sleep or Nap	8	4	1	8	0.0794017	15	7.875	1.89	8.43272	0.557719	7.08215	0.0948686	1.07082	7.875	1.04167
82	Bedroom/living room	10	Sedentary/Passive	8	5.5	1.3	10.4	0.0760684	30	13.25	1.59	14.3805	1.13054	8.5324	0.0723199	1.08532	13.25	2.08333
84	Manufacturing where hazardous materials are not used	7	moderate exercise	8	17.8571	3	24	0.0760684	42.8571	28.9286	2.43	30.4974	1.56879	5.42299	0.0786953	1.05423	28.9286	2.97619
83	office space	5	Sedentary/Passive	8	8.5	1.5	12	0.0760684	60	24	1.44	26.2813	2.28134	9.5056	0.0456598	1.09506	24	4.16667
				8					200000									13888.9

## Sheet: Fig S3. ASHRAE 241
Table S2: Estimated main metrics for ASHRAE 241 for 29 occupancy categories
			Inhalation flow rate (L/s):		0.1	deposition and inactivation rate (h-1):		0.93
no	Occupancy category	occupant density (persons/100 m2)	Physical activity	Exposure time (hr)	ASHRAE ECAi (L/s.p)	Met Value	Met*Delta t	Inhalation rate (P), L/s	Vp (m3/p)	qc: ASHRAE physical clean air equivalent (L/s.p)	nc: ASHRAE physical clean air equivalent (ach)	qe: effective clean flow rate (L/s.p)	qa = qe-qc	increase (%)	iFt (h)	spaciousness factor	qc-tote	Vp-tote
1	Audotorium	150	Sedentary/Passive	2	25	1.3	2.6	0.0760684	2	25.5167	45.93	25.7975	0.280835	1.10059	0.0100785	1.01101	25.5167	0.555556
2	Cafeteria	100	moderate exercise	1	30	2	2	0.457692	3	30.775	36.93	31.6315	0.856527	2.78319	0.00632281	1.02783	30.775	1.66667
3	Call center	60	Sedentary/Passive	4	15	1.5	6	0.1	5	16.2917	11.73	16.6465	0.354784	2.1777	0.0360437	1.02178	16.2917	0.694444
4	Convention	150	Sedentary/Passive	4	30	1.3	5.2	0.0883333	2	30.5167	54.93	30.6562	0.139524	0.457206	0.0169623	1.00457	30.5167	0.277778
5	corectional cell	25	Sleep or Nap	8	15	1	8	0.0794017	12	18.1	5.43	18.5265	0.426484	2.35627	0.0431814	1.02356	18.1	0.833333
6	correctional dayroom	30	Sedentary/Passive	4	20	1.3	5.2	0.0783333	10	22.5833	8.13	23.2998	0.716476	3.17259	0.0223178	1.03173	22.5833	1.38889
7	Daycare	25	light exercise	4	20	1.8	7.2	0.320833	12	23.1	6.93	23.9645	0.864521	3.74251	0.0300444	1.03743	23.1	1.66667
8	Elementary School	25	Sedentary/Passive	4	20	1.3	5.2	0.0783333	12	23.1	6.93	23.9645	0.864521	3.74251	0.0216987	1.03743	23.1	1.66667
9	Gym	7	heavy exercise	1	40	7	7	0.849145	42.8571	51.0714	4.29	66.3184	15.247	29.8542	0.0105551	1.29854	51.0714	23.8095
10	Health care exam room	20	Sedentary/Passive	1	20	1.3	1.3	0.1	15	23.875	5.73	28.9027	5.02773	21.0585	0.00449785	1.21059	23.875	8.33333
11	Health care group treament area	20	Sedentary/Passive	1	35	1.3	1.3	0.1	15	38.875	9.33	43.5414	4.6664	12.0036	0.00298566	1.12004	38.875	8.33333
12	Health care patient room	20	Sleep or Nap	8	35	1	8	0.076	15	38.875	9.33	39.4029	0.527906	1.35796	0.0203031	1.01358	38.875	1.04167
13	Health care resident room	20	Sleep or Nap	8	25	1	8	0.076	15	28.875	6.93	29.4054	0.5304	1.83688	0.0272059	1.01837	28.875	1.04167
14	Health care waiting room	50	Sedentary/Passive	2	45	1.3	2.6	0.1	6	46.55	27.93	47.3985	0.848524	1.82282	0.0054854	1.01823	46.55	1.66667
15	High school	35	Sedentary/Passive	4	20	1.3	5.2	0.1	8.57143	22.2143	9.33	22.8259	0.611627	2.7533	0.0227811	1.02753	22.2143	1.19048
16	Lecture hall	150	Sedentary/Passive	1	25	1.3	1.3	0.0883333	2	25.5167	45.93	26.0846	0.56792	2.22568	0.00498379	1.02226	25.5167	1.11111
17	Lobbies	150	Sedentary/Passive	0.5	25	1.5	0.75	0.0760684	2	25.5167	45.93	26.6784	1.1617	4.5527	0.00281127	1.04553	25.5167	2.22222
18	Manufacturing	7	moderate exercise	4	25	3	12	0.441228	42.8571	36.0714	3.03	39.3152	3.24381	8.99275	0.0305225	1.08993	36.0714	5.95238
19	Museum	40	light exercise	4	30	1.8	7.2	0.20754	7.5	31.9375	15.33	32.467	0.529468	1.65782	0.0221764	1.01658	31.9375	1.04167
20	Office	5	Sedentary/Passive	4	15	1.5	6	0.0760684	60	30.5	1.83	35.3222	4.82225	15.8107	0.0169865	1.15811	30.5	8.33333
21	Place of religious workship	120	Sedentary/Passive	2	25	1.3	2.6	0.0760684	2.5	25.6458	36.93	25.9978	0.351988	1.3725	0.0100008	1.01372	25.6458	0.694444
22	Residential common space	30	Sedentary/Passive	4	25	1.3	5.2	0.0760684	10	27.5833	9.93	28.2957	0.712379	2.58264	0.0183773	1.02583	27.5833	1.38889
23	Residential dwelling unit	3	Sleep or Nap	8	15	1	8	0.0760684	100	40.8333	1.47	44.6282	3.79489	9.2936	0.0179259	1.09294	40.8333	6.94444
24	Restaurant	70	moderate exercise	1	30	2	2	0.457692	4.28571	31.1071	26.13	32.345	1.23785	3.97931	0.00618334	1.03979	31.1071	2.38095
25	Retail	15	light exercise	1	20	1.8	1.8	0.457692	20	25.1667	4.53	32.1977	7.03104	27.9379	0.00559046	1.27938	25.1667	11.1111
26	Sorting, packagin, light assembly	7	moderate exercise	4	10	3.5	14	0.457692	42.8571	21.0714	1.77	24.5337	3.4623	16.4312	0.0570643	1.16431	21.0714	5.95238
27	Spectator area	150	Sedentary/Passive	2	25	1.3	2.6	0.457692	2	25.5167	45.93	25.7975	0.280835	1.10059	0.0100785	1.01101	25.5167	0.555556
28	Transportation waiting	100	Sedentary/Passive	1	30	1.3	1.3	0.1	3	30.775	36.93	31.6315	0.856527	2.78319	0.00410982	1.02783	30.775	1.66667
29	Warehouse	2	moderate exercise	4	10	2	8	0.458	150	48.75	1.17	61.8414	13.0914	26.8541	0.0129363	1.26854	48.75	20.8333

## Sheet: Fig S4ab. ASHRAE 62.1
Table 1: The minimum clean air equivalent for 84 space categories in ASHRAE 62.1, and the corresponding new derived flow rates based on a threshold intake fraction time of 0.02 hr. Occupant density and exposure times remain unchanged.
			Inhalation flow rate (L/s):		0.1	deposition and inactivation rate (h-1):		0.93
no	Space type	N, people / 100 m2	Physical activity	Exposure time (hr)	ASHRAE outdoor air rate (L/s.p)	Met Value	Met*Delta t	Inhalation rate (P), L/s	Vp (m3/p)	qc: ASHRAE physical clean air equivalent (L/s.p)	nc: ASHRAE physical clean air equivalent (ach)	qe: effective clean flow rate (L/s.p)	qa = qe-qc	increase (%)	iFt (h)	Spaciousness factor	qc-tote	Vp-tote	qe (iFt = 0.02 hr)	qc (iFt <= 0.02 hr)	Vp (iFt <=0.02)	Vp_solver	Vp-tote (new)	qc_Vp_new (iFt <= 0.02 hr)
1	Lobbies (public assembly spaces)	150	Sedentary/Passive	0.1	2.7	1.5	0.15	0.0760684	2	3.21667	5.79	13.3549	10.1382	315.177	0.00112319	4.15177	3.21667	11.1111	0.75	1	2	-23.8959	11.1111	3.21667
2	Telephone/data entry	60	Sedentary/Passive	0.1	3	1.5	0.15	0.0760684	5	4.29167	3.09	30.711	26.4193	615.596	0.000488424	7.15596	4.29167	27.7778	0.75	1	2	-24.4038	11.1111	3.51667
3	Lobbies/prefunction	30	light exercise	0.1	4.8	2	0.2	0.20812	10	7.38333	2.658	60.5848	53.2015	720.562	0.000330116	8.20562	7.38333	55.5556	1	1	2	-27.3593	11.1111	5.31667
4	Animal surgery scrub	20	light exercise	0.1	9.5	2.3	0.23	0.20812	15	13.375	3.21	92.4833	79.1083	591.464	0.000248694	6.91464	13.375	83.3333	1.15	1	2	-36.915	11.1111	10.0167
5	Main entry lobbies (office buildings)	10	light exercise	0.1	5.5	2	0.2	0.20812	30	13.25	1.59	175.616	162.366	1225.4	0.000113885	13.254	13.25	166.667	1	1	2	-28.7091	11.1111	6.01667
6	Occupiable storage rooms for liquids and gels	2	Sedentary/Passive	0.1	32.5	1.5	0.15	0.0760684	150	71.25	1.71	881.502	810.252	1137.2	1.70164e-05	12.372	71.25	833.333	0.75	1	2	-98.7318	11.1111	33.0167
7	Occupiable storage rooms for dry materials	2	Sedentary/Passive	0.1	17.5	1.5	0.15	0.0760684	150	56.25	1.35	871.251	815.001	1448.89	1.72166e-05	15.4889	56.25	833.333	0.75	1	2	-56.7068	11.1111	18.0167
8	Booking/waiting	50	Sedentary/Passive	0.5	4.4	1.5	0.75	0.0760684	6	5.95	3.57	11.1469	5.19692	87.3431	0.00672832	1.87343	5.95	6.66667	3.75	1	2	-4.8161	2.22222	4.91667
9	Mall common areas	40	light exercise	0.5	4.55	2.3	1.15	0.20812	7.5	6.4875	3.114	13.1564	6.66888	102.796	0.00874101	2.02796	6.4875	8.33333	5.75	1	2	-1.41079	2.22222	5.06667
10	Reception areas	30	Sedentary/Passive	0.5	3.5	1.5	0.75	0.0760684	10	6.08333	2.19	15.5079	9.42455	154.924	0.00483625	2.54924	6.08333	11.1111	3.75	1	2	-3.18113	2.22222	4.01667
11	Coffee stations	20	Sedentary/Passive	0.5	4	1.5	0.75	0.0760684	15	7.875	1.89	22.3025	14.4275	183.206	0.00336286	2.83206	7.875	16.6667	3.75	1	2	-4.07929	2.22222	4.51667
12	Animal exam room	20	light/moderate	0.5	8	2.8	1.4	0.298032	15	11.875	2.85	25.427	13.552	114.122	0.00550596	2.14122	11.875	16.6667	7	1	2	-5.87631	2.22222	8.51667
13	Animal preparation rooms	20	moderate exercise	0.5	9.5	3.5	1.75	0.37254	15	13.375	3.21	26.6375	13.2625	99.1588	0.00656969	1.99159	13.375	16.6667	8.75	1	2	-5.48398	2.22222	10.0167
14	Animal procedure room	20	light/moderate	0.5	9.5	3	1.5	0.31932	15	13.375	3.21	26.6375	13.2625	99.1588	0.00563116	1.99159	13.375	16.6667	7.5	1	2	-8.1215	2.22222	10.0167
15	Large-animal holding room	20	moderate exercise	0.5	9.5	3.5	1.75	0.37254	15	13.375	3.21	26.6375	13.2625	99.1588	0.00656969	1.99159	13.375	16.6667	8.75	1	2	-5.48398	2.22222	10.0167
16	Bank vaults or safe deposit	5	light exercise	0.5	8.5	2.3	1.15	0.20812	60	24	1.44	83.5783	59.5783	248.243	0.00137596	3.48243	24	66.6667	5.75	1	2	-9.43377	2.22222	9.01667
17	Lecture hall (fixed seats)	150	Sedentary/Passive	1	4	1.8	1.8	0.0883333	2	4.51667	8.13	5.14993	0.633261	14.0205	0.0349519	1.14021	4.51667	1.11111	9	8.46913	7.74456	3.12639e-13	4.30253	6.00068
18	Multi-use assembly	100	Sedentary/Passive	1	4.1	1.8	1.8	0.0883333	3	4.875	5.85	5.87667	1.00167	20.547	0.0306296	1.20547	4.875	1.66667	9	8.11416	7.61431	2.22045e-13	4.23017	6.06703
19	Bars, cocktail lounges	100	moderate exercise	1	4.7	2	2	0.457692	3	5.475	6.57	6.45632	0.981319	17.9236	0.0309774	1.17924	5.475	1.66667	10	9.13859	8.2712	-9.85815e-07	4.59511	6.83673
20	Cafeteria/fast-food dining	100	moderate exercise	1	4.7	2	2	0.457692	3	5.475	6.57	6.45632	0.981319	17.9236	0.0309774	1.17924	5.475	1.66667	10	9.13859	8.2712	-9.85815e-07	4.59511	6.83673
21	Transportation waiting	100	light exercise	1	4.1	3.5	3.5	0.20812	3	4.875	5.85	5.87667	1.00167	20.547	0.0595576	1.20547	4.875	1.66667	17.5	16.7553	19.6383	-9.65534e-07	10.9102	9.17324
22	Restaurant dining rooms	70	moderate exercise	1	5.08571	2	2	0.457692	4.28571	6.19286	5.202	7.65661	1.46376	23.6362	0.0261212	1.23636	6.19286	2.38095	10	8.64571	7.76041	2.93099e-13	4.31134	7.09049
23	Lecture classroom	65	Sedentary/Passive	1	4.26154	1.8	1.8	0.0883333	4.61538	5.45385	4.254	7.0989	1.64505	30.1631	0.0253561	1.30163	5.45385	2.5641	9	7.46722	7.40263	-9.89814e-07	4.11257	6.17388
24	Break rooms (crowded)	50	Sedentary/Passive	1	3.7	1.5	1.5	0.0760684	6	5.25	3.15	7.54155	2.29155	43.6485	0.0198898	1.43649	5.25	3.33333	7.5	5.22919	5.97241	1.31871e-10	3.318	5.24287
25	Bowling Alley	40	moderate exercise	1	6.5	3.8	3.8	0.457692	7.5	8.4375	4.05	11.1403	2.70276	32.0327	0.0341105	1.32033	8.4375	4.16667	19	16.6825	18.8239	0	10.4577	11.3628
26	Health club (aerobic rooms)	40	heavy exercise	1	10.75	8	8	0.849145	7.5	12.6875	6.09	15.1734	2.48588	19.5931	0.0527239	1.19593	12.6875	4.16667	40	38.0948	43.2319	2.27374e-13	24.0177	21.9182
27	Classroom (age 9 plus)	35	Sedentary/Passive	1	6.71429	1.8	1.8	0.08	8.57143	8.92857	3.75	12.0721	3.14351	35.2074	0.0149104	1.35207	8.92857	4.7619	9	5.5685	3.96345	-9.84602e-07	2.20192	7.73818
28	Music/theater/dance	35	heavy exercise	1	5.85714	7.8	7.8	0.816667	8.57143	8.07143	3.39	11.2894	3.21794	39.8683	0.0690915	1.39868	8.07143	4.7619	39	36.7314	47.6093	5.68434e-14	26.4496	18.1562
29	Classroom (ages 5-8)	25	Sedentary/Passive	1	7.4	1.8	1.8	0.0783333	12	10.5	3.15	15.0831	4.5831	43.6485	0.0119339	1.43649	10.5	6.66667	9	3.55187	2.90352	-9.7242e-07	1.61307	8.15008
30	Computer lab	25	Sedentary/Passive	1	7.4	1.5	1.5	0.0707895	12	10.5	3.15	15.0831	4.5831	43.6485	0.00994491	1.43649	10.5	6.66667	7.5	1.52824	2	-2.00859	1.11111	7.91667
31	Daycare (through age 4)	25	moderate exercise	1	8.6	3.3	3.3	0.320833	12	11.7	3.51	16.1688	4.46877	38.1946	0.0204097	1.38195	11.7	6.66667	16.5	12.0893	12.5254	3.28267e-08	6.95856	11.8357
32	Media center	25	Sedentary/Passive	1	7.4	1.5	1.5	0.0707895	12	10.5	3.15	15.0831	4.5831	43.6485	0.00994491	1.43649	10.5	6.66667	7.5	1.52824	2	-2.00859	1.11111	7.91667
33	Science laboratories	25	moderate exercise	1	8.6	4.5	4.5	0.363889	12	11.7	3.51	16.1688	4.46877	38.1946	0.0278314	1.38195	11.7	6.66667	22.5	18.4705	21.1575	-9.78757e-07	11.7541	14.0657
34	University/college laboratories	25	moderate exercise	1	8.6	3.5	3.5	0.433333	12	11.7	3.51	16.1688	4.46877	38.1946	0.0216467	1.38195	11.7	6.66667	17.5	13.1665	13.9798	-9.79729e-07	7.76657	12.2115
35	Break rooms (spacious)	25	Sedentary/Passive	1	3.7	1.5	1.5	0.0760684	12	6.8	2.04	11.8561	5.05612	74.3547	0.0126517	1.74355	6.8	6.66667	7.5	1.52824	5.97241	-9.75474e-07	3.318	5.24287
36	Art classroom	20	moderate exercise	1	9.5	3.3	3.3	0.363889	15	13.375	3.21	19.0786	5.70364	42.6441	0.0172968	1.42644	13.375	8.33333	16.5	10.5866	11.3023	-9.81594e-07	6.27904	12.4198
37	Wood/metal shop	20	moderate exercise	1	9.5	3.3	3.3	0.441228	15	13.375	3.21	19.0786	5.70364	42.6441	0.0172968	1.42644	13.375	8.33333	16.5	10.5866	11.3023	-9.81594e-07	6.27904	12.4198
38	Kitchen (cooking)	20	moderate exercise	1	6.8	3.3	3.3	0.457692	15	10.675	2.562	16.6851	6.01008	56.3005	0.0197782	1.563	10.675	8.33333	16.5	10.5866	14.8868	1.90031e-09	8.27043	10.6458
39	Coin-operated laundries	20	light exercise	1	6.8	2	2	0.20812	15	10.675	2.562	16.6851	6.01008	56.3005	0.0119868	1.563	10.675	8.33333	10	2.8013	5.3788	-9.73781e-07	2.98822	8.18952
40	Animal imaging (MRI/CT/PET)	20	light/moderate	1	9.5	3	3	0.31932	15	13.375	3.21	19.0786	5.70364	42.6441	0.0157244	1.42644	13.375	8.33333	15	8.89485	9.07018	-9.86778e-07	5.03899	11.8431
41	Animal necropsy	20	moderate/vigorous	1	9.5	4.5	4.5	0.47898	15	13.375	3.21	19.0786	5.70364	42.6441	0.0235866	1.42644	13.375	8.33333	22.5	17.1282	20.0081	2.94875e-13	11.1156	14.6688
42	Animal postoperative recovery room	20	light exercise	1	9.5	2.5	2.5	0.2661	15	13.375	3.21	19.0786	5.70364	42.6441	0.0131037	1.42644	13.375	8.33333	12.5	5.97676	5.24069	-9.78022e-07	2.9115	10.8538
43	Small-animal-cage room (static cages)	20	light exercise	1	9.5	2.3	2.3	0.20812	15	13.375	3.21	19.0786	5.70364	42.6441	0.0120554	1.42644	13.375	8.33333	11.5	4.7534	3.63927	-9.65382e-07	2.02182	10.4401
44	Small-animal-cage room (ventilated cages)	20	light exercise	1	9.5	2.3	2.3	0.20812	15	13.375	3.21	19.0786	5.70364	42.6441	0.0120554	1.42644	13.375	8.33333	11.5	4.7534	3.63927	-9.65382e-07	2.02182	10.4401
45	Banks or bank lobbies	15	light exercise	1	5.8	2	2	0.20812	20	10.9667	1.974	19.4521	8.48539	77.3744	0.0102817	1.77374	10.9667	11.1111	10	1	6.79143	0	3.77302	7.55445
46	Health club (weight rooms)	10	heavy exercise	1	13	6	6	0.849145	30	20.75	2.49	32.8484	12.0984	58.3053	0.0182658	1.58305	20.75	16.6667	30	17.7897	26.2473	2.28547e-07	14.5819	19.7806
47	Laundry rooms, central	10	moderate exercise	1	8.5	4	4	0.457692	30	16.25	1.95	29.0106	12.7606	78.5266	0.0137881	1.78527	16.25	16.6667	20	5.6026	17.7134	-9.72489e-07	9.8408	13.076
48	Laundry rooms within dwelling units	10	moderate exercise	1	8.5	4	4	0.457692	30	16.25	1.95	29.0106	12.7606	78.5266	0.0137881	1.78527	16.25	16.6667	20	5.6026	17.7134	-9.72489e-07	9.8408	13.076
49	Pharmacy (prep. area)	10	light exercise	1	11.5	1.8	1.8	0.20812	30	19.25	2.31	31.5538	12.3038	63.9157	0.00570455	1.63916	19.25	16.6667	9	1	2	-7.92561	1.11111	12.0167
50	Photo studios	10	light exercise	1	8.5	1.8	1.8	0.20812	30	16.25	1.95	29.0106	12.7606	78.5266	0.00620463	1.78527	16.25	16.6667	9	1	2	-1.17686	1.11111	9.01667
51	Pet shops (animal areas)	10	moderate exercise	1	12.8	4.3	4.3	0.457692	30	20.55	2.466	32.6749	12.1249	59.002	0.0131599	1.59002	20.55	16.6667	21.5	7.60119	14.145	0	7.85833	16.4541
52	Libraries (public assembly spaces)	10	Sedentary/Passive	1	8.5	1.5	1.5	0.0883333	30	16.25	1.95	29.0106	12.7606	78.5266	0.00517053	1.78527	16.25	16.6667	7.5	1	2	-4.35375	1.11111	9.01667
53	Supermarket	8	light exercise	1	7.55	2.3	2.3	0.20812	37.5	17.2375	1.6548	33.7198	16.4823	95.619	0.00682091	1.95619	17.2375	20.8333	11.5	1	6.57442	-5.68434e-14	3.65246	9.24839
54	Gym, sports arena (play area)	7	heavy exercise	1	22.8571	7	7	0.849145	42.8571	33.9286	2.85	50.6836	16.755	49.3833	0.0138112	1.49383	33.9286	23.8095	35	16.2141	20.1823	0	11.2124	28.0709
55	Shipping/receiving	2	heavy exercise	1	35	8	8	0.849145	150	73.75	1.77	138.821	65.0705	88.2312	0.00576284	1.88231	73.75	83.3333	40	1	9.46694	-6.25278e-13	5.25941	37.4456
56	Auditorium seating area	150	Sedentary/Passive	2	2.7	1.5	3	0.0760684	2	3.21667	5.79	3.5207	0.30403	9.4517	0.0852104	1.09452	3.21667	0.555556	15	14.8047	27.0393	-9.64546e-07	7.51091	9.68515
57	Spectator areas	150	moderate exercise	2	4	3.3	6.6	0.457692	2	4.51667	8.13	4.81265	0.295981	6.55308	0.137139	1.06553	4.51667	0.555556	33	32.8398	63.199	0	17.5553	20.3264
58	Places of religious worship	120	Sedentary/Passive	2	2.75	1.3	2.6	0.0760684	2.5	3.39583	4.89	3.78258	0.386745	11.3888	0.0687362	1.11389	3.39583	0.694444	13	12.7322	22.6412	0	6.28921	8.59897
59	Multi-purpose assembly	120	Sedentary/Passive	2	2.75	1.5	3	0.0760684	2.5	3.39583	4.89	3.78258	0.386745	11.3888	0.079311	1.11389	3.39583	0.694444	15	14.7417	26.9429	0	7.48414	9.71025
60	Disco/Dance floors	100	heavy exercise	2	10.3	7.8	15.6	0.849145	3	11.075	13.29	11.508	0.432955	3.9093	0.135558	1.03909	11.075	0.833333	78	77.7856	147.771	0	41.0474	48.474
61	Courtrooms	70	Sedentary/Passive	2	2.92857	1.5	3	0.0760684	4.28571	4.03571	3.39	4.733	0.69729	17.278	0.0633847	1.17278	4.03571	1.19048	15	14.4923	26.5981	3.90799e-14	7.38836	9.79975
62	Stages, studios	70	moderate exercise	2	5.42857	3.3	6.6	0.457692	4.28571	6.53571	5.49	7.19058	0.654869	10.0199	0.0917867	1.1002	6.53571	1.19048	33	32.5843	60.4701	6.39488e-14	16.7972	21.05
63	Conference/meeting	50	Sedentary/Passive	2	3.1	1.5	3	0.0760684	6	4.65	2.79	5.66062	1.01062	21.7338	0.0529977	1.21734	4.65	1.66667	15	14.2251	26.2662	-9.56577e-07	7.29616	9.88543
64	Museums (children's)	40	moderate exercise	2	5.3	3.3	6.6	0.363889	7.5	7.2375	3.474	8.45293	1.21543	16.7935	0.0780794	1.16794	7.2375	2.08333	33	32.1619	60.7168	0	16.8658	20.9852
65	Museums (galleries)	40	light exercise	2	4.55	2	4	0.20754	7.5	6.4875	3.114	7.7255	1.238	19.0828	0.0517766	1.19083	6.4875	2.08333	20	19.0474	34.2118	0	9.50328	13.3881
66	Dayroom	30	Sedentary/Passive	2	3.5	1.3	2.6	0.0760684	10	6.08333	2.19	7.85403	1.7707	29.1074	0.033104	1.29107	6.08333	2.77778	13	11.4658	21.1756	2.98428e-13	5.88211	8.97037
67	Daycare sickroom	25	Sedentary/Passive	2	8.6	1.3	2.6	0.0760684	12	11.7	3.51	13.6415	1.9415	16.594	0.0190595	1.16594	11.7	3.33333	13	11.065	10.6208	4.05913e-07	2.95023	11.3437
68	Barbershop	25	Sedentary/Passive	2	5	1.3	2.6	0.0760684	12	8.1	2.43	10.178	2.07801	25.6544	0.0255453	1.25654	8.1	3.33333	13	11.065	18.1834	8.09287e-07	5.05095	9.69738
69	Beauty and nail salons	25	Sedentary/Passive	2	12.4	1.3	2.6	0.0760684	12	15.5	4.65	17.3673	1.86728	12.047	0.0149707	1.12047	15.5	3.33333	13	11.065	2	-0.281997	0.555556	12.9167
70	Animal operating rooms	20	moderate exercise	2	9.5	3.5	7	0.37254	15	13.375	3.21	15.838	2.46295	18.4146	0.0441976	1.18415	13.375	4.16667	35	33.0279	56.8599	0	15.7944	24.1888
71	Sorting, packing, light assembly	7	moderate exercise	2	12.3714	3.5	7	0.457692	42.8571	23.4429	1.9692	31.214	7.77118	33.1494	0.0224258	1.33149	23.4429	11.9048	35	27.5149	51.1522	-9.8075e-07	14.2089	25.5857
72	Computer (not printing)	4	Sedentary/Passive	2	10	1.5	3	0.0760684	75	29.375	1.41	44.0717	14.6967	50.0314	0.00680708	1.50031	29.375	20.8333	15	1	12.0862	0	3.35729	13.1223
73	Gambling Casinos	120	moderate exercise	4	4.55	2.5	10	0.457692	2.5	5.19583	7.482	5.37545	0.179613	3.45686	0.186031	1.03457	5.19583	0.347222	50	49.9198	130.842	1.98952e-13	18.1724	38.3507
74	Legislative chambers	50	Sedentary/Passive	4	3.1	1.5	6	0.0760684	6	4.65	2.79	5.10767	0.45767	9.84237	0.11747	1.09842	4.65	0.833333	30	29.7275	77.5138	0	10.7658	23.1244
75	Cell	25	Sleep or Nap	4	4.9	1	4	0.0794017	12	8	2.4	8.93016	0.930162	11.627	0.044792	1.11627	8	1.66667	20	19.2804	44.02	2.27374e-13	6.11389	16.2718
76	Game arcades	20	moderate exercise	4	8.3	5.8	23.2	0.457692	15	12.175	2.922	13.3141	1.13912	9.3562	0.174251	1.09356	12.175	2.08333	116	115.389	309.585	0	42.9979	88.2761
77	Guard stations	15	Sedentary/Passive	4	4.5	1.3	5.2	0.0760684	20	9.66667	1.74	11.2868	1.62013	16.7599	0.0460715	1.1676	9.66667	2.77778	26	24.7216	62.299	0	8.65263	20.5939
78	Sales (except as below)	15	moderate exercise	4	7.8	2.3	9.2	0.457692	20	12.9667	2.334	14.522	1.55535	11.995	0.0633521	1.11995	12.9667	2.77778	46	44.8951	110.658	0	15.3691	36.3865
79	Libraries (educational facilities)	10	Sedentary/Passive	4	8.5	1.5	6	0.0883333	30	16.25	1.95	18.6386	2.38858	14.699	0.0321913	1.14699	16.25	4.16667	30	27.9472	62.8899	2.34479e-13	8.73471	24.7466
80	Manufacturing (excludes heavy industrial and process using chemicals )	7	moderate exercise	4	17.8571	3	12	0.457692	42.8571	28.9286	2.43	32.2458	3.31727	11.4671	0.0372141	1.11467	28.9286	5.95238	60	57.3123	123.432	0	17.1433	49.7437
81	Barracks, sleeping areas	20	Sleep or Nap	8	4	1	8	0.0794017	15	7.875	1.89	8.43272	0.557719	7.08215	0.0948686	1.07082	7.875	1.04167	40	39.6649	121.398	0	8.43038	35.361
82	Bedroom/living room	10	Sedentary/Passive	8	5.5	1.3	10.4	0.0760684	30	13.25	1.59	14.3805	1.13054	8.5324	0.0723199	1.08532	13.25	2.08333	52	51.253	156.839	3.2685e-13	10.8916	46.0167
83	Manufacturing where hazardous materials are not used	7	moderate exercise	8	17.8571	3	24	0.0760684	42.8571	28.9286	2.43	30.4974	1.56879	5.42299	0.0786953	1.05423	28.9286	2.97619	120	119.054	345.082	6.82121e-13	23.964	107.003
84	office space	5	Sedentary/Passive	8	8.5	1.5	12	0.0760684	60	24	1.44	26.2813	2.28134	9.5056	0.0456598	1.09506	24	4.16667	60	58.2827	173.941	0	12.0792	53.4347

## Sheet: Fig S4bc. ASHRAE 241
Table 1: The minimum clean air equivalent for 29 space categories in ASHRAE 241, and the corresponding new derived flow rates based on a threshold intake fraction time of 0.02 hr. Occupant density and exposure times remain unchanged.
			Inhalation flow rate (L/s):		0.1	deposition and inactivation rate (h-1):		0.93
no	Occupancy category	occupant density (persons/100 m2)	Physical activity	Exposure time (hr)	ASHRAE ECAi (L/s.p)	Met Value	Met*Delta t	Inhalation rate (P), L/s	Vp (m3/p)	qc: ASHRAE physical clean air equivalent (L/s.p)	nc: ASHRAE physical clean air equivalent (ach)	qe: effective clean flow rate (L/s.p)	qa = qe-qc	increase (%)	iFt (h)	spaciousness factor	qc-tote	Vp-tote	qe (iFt = 0.02 hr)	qc (iFt <= 0.02 hr)	Vp (iFt <=0.02)	Vp_solver
1	Audotorium	150	Sedentary/Passive	2	25	1.3	2.6	0.0760684	2	25.5167	45.93	25.7975	0.280835	1.10059	0.0100785	1.01101	25.5167	0.555556	13	12.7975	2	-33.1444
2	Cafeteria	100	moderate exercise	1	30	2	2	0.457692	3	30.775	36.93	31.6315	0.856527	2.78319	0.00632281	1.02783	30.775	1.66667	10	9.13859	2	-55.0831
3	Call center	60	Sedentary/Passive	4	15	1.5	6	0.1	5	16.2917	11.73	16.6465	0.354784	2.1777	0.0360437	1.02178	16.2917	0.694444	30	29.7831	44.8495	-1.67724e-05
4	Convention	150	Sedentary/Passive	4	30	1.3	5.2	0.0883333	2	30.5167	54.93	30.6562	0.139524	0.457206	0.0169623	1.00457	30.5167	0.277778	26	25.9285	2	-13.2162
5	corectional cell	25	Sleep or Nap	8	15	1	8	0.0794017	12	18.1	5.43	18.5265	0.426484	2.35627	0.0431814	1.02356	18.1	0.833333	40	39.7465	85.288	2.58111e-05
6	correctional dayroom	30	Sedentary/Passive	4	20	1.3	5.2	0.0783333	10	22.5833	8.13	23.2998	0.716476	3.17259	0.0223178	1.03173	22.5833	1.38889	26	25.4644	18.6832	-1.82863e-06
7	Daycare	25	light exercise	4	20	1.8	7.2	0.320833	12	23.1	6.93	23.9645	0.864521	3.74251	0.0300444	1.03743	23.1	1.66667	36	35.3802	48.161	-6.40137e-06
8	Elementary School	25	Sedentary/Passive	4	20	1.3	5.2	0.0783333	12	23.1	6.93	23.9645	0.864521	3.74251	0.0216987	1.03743	23.1	1.66667	26	25.3269	18.6832	-8.20467e-07
9	Gym	7	heavy exercise	1	40	7	7	0.849145	42.8571	51.0714	4.29	66.3184	15.247	29.8542	0.0105551	1.29854	51.0714	23.8095	35	16.2141	2	-18.2318
10	Health care exam room	20	Sedentary/Passive	1	20	1.3	1.3	0.1	15	23.875	5.73	28.9027	5.02773	21.0585	0.00449785	1.21059	23.875	8.33333	6.5	1	2	-34.4271
11	Health care group treament area	20	Sedentary/Passive	1	35	1.3	1.3	0.1	15	38.875	9.33	43.5414	4.6664	12.0036	0.00298566	1.12004	38.875	8.33333	6.5	1	2	-77.4663
12	Health care patient room	20	Sleep or Nap	8	35	1	8	0.076	15	38.875	9.33	39.4029	0.527906	1.35796	0.0203031	1.01358	38.875	1.04167	40	39.6649	17.7531	2.80233e-08
13	Health care resident room	20	Sleep or Nap	8	25	1	8	0.076	15	28.875	6.93	29.4054	0.5304	1.83688	0.0272059	1.01837	28.875	1.04167	40	39.6649	51.9162	1.64978e-05
14	Health care waiting room	50	Sedentary/Passive	2	45	1.3	2.6	0.1	6	46.55	27.93	47.3985	0.848524	1.82282	0.0054854	1.01823	46.55	1.66667	13	12.1958	2	-94.0209
15	High school	35	Sedentary/Passive	4	20	1.3	5.2	0.1	8.57143	22.2143	9.33	22.8259	0.611627	2.7533	0.0227811	1.02753	22.2143	1.19048	26	25.5585	2	14.844
16	Lecture hall	150	Sedentary/Passive	1	25	1.3	1.3	0.0883333	2	25.5167	45.93	26.0846	0.56792	2.22568	0.00498379	1.02226	25.5167	1.11111	6.5	5.92187	2	-48.1116
17	Lobbies	150	Sedentary/Passive	0.5	25	1.5	0.75	0.0760684	2	25.5167	45.93	26.6784	1.1617	4.5527	0.00281127	1.04553	25.5167	2.22222	3.75	2.08485	2	-54.8443
18	Manufacturing	7	moderate exercise	4	25	3	12	0.441228	42.8571	36.0714	3.03	39.3152	3.24381	8.99275	0.0305225	1.08993	36.0714	5.95238	60	57.3123	103.7	6.51306e-05
19	Museum	40	light exercise	4	30	1.8	7.2	0.20754	7.5	31.9375	15.33	32.467	0.529468	1.65782	0.0221764	1.01658	31.9375	1.04167	36	35.6559	18.9666	-2.01836e-06
20	Office	5	Sedentary/Passive	4	15	1.5	6	0.0760684	60	30.5	1.83	35.3222	4.82225	15.8107	0.0169865	1.15811	30.5	8.33333	30	25.0537	44.8494	4.05922e-06
21	Place of religious workship	120	Sedentary/Passive	2	25	1.3	2.6	0.0760684	2.5	25.6458	36.93	25.9978	0.351988	1.3725	0.0100008	1.01372	25.6458	0.694444	13	12.7322	2	-33.1444
22	Residential common space	30	Sedentary/Passive	4	25	1.3	5.2	0.0760684	10	27.5833	9.93	28.2957	0.712379	2.58264	0.0183773	1.02583	27.5833	1.38889	26	25.4644	3.34467	4.88398e-06
23	Residential dwelling unit	3	Sleep or Nap	8	15	1	8	0.0760684	100	40.8333	1.47	44.6282	3.79489	9.2936	0.0179259	1.09294	40.8333	6.94444	40	36.3718	85.288	4.07053e-07
24	Restaurant	70	moderate exercise	1	30	2	2	0.457692	4.28571	31.1071	26.13	32.345	1.23785	3.97931	0.00618334	1.03979	31.1071	2.38095	10	8.64571	2	-55.0831
25	Retail	15	light exercise	1	20	1.8	1.8	0.457692	20	25.1667	4.53	32.1977	7.03104	27.9379	0.00559046	1.27938	25.1667	11.1111	9	1	2	-29.2173
26	Sorting, packagin, light assembly	7	moderate exercise	4	10	3.5	14	0.457692	42.8571	21.0714	1.77	24.5337	3.4623	16.4312	0.0570643	1.16431	21.0714	5.95238	70	67.4165	173.433	-0.000104063
27	Spectator area	150	Sedentary/Passive	2	25	1.3	2.6	0.457692	2	25.5167	45.93	25.7975	0.280835	1.10059	0.0100785	1.01101	25.5167	0.555556	13	12.7975	2	-33.1444
28	Transportation waiting	100	Sedentary/Passive	1	30	1.3	1.3	0.1	3	30.775	36.93	31.6315	0.856527	2.78319	0.00410982	1.02783	30.775	1.66667	6.5	5.53249	2	-62.4872
29	Warehouse	2	moderate exercise	4	10	2	8	0.458	150	48.75	1.17	61.8414	13.0914	26.8541	0.0129363	1.26854	48.75	20.8333	40	25.0658	87.4949	2.71508e-05
